# Supplementary material for: Leisure-time physical activity and circulating 25-hydroxyvitamin D levels in cancer survivors: a cross-sectional analysis using data from the US National Health and Nutrition Examination Survey
Source: PubMed Central journal article supplement — BMJ Open. 2017 Jul 10;7(7):e016064. doi: 10.1136/bmjopen-2017-016064 (PMC5541594; doi:10.1136/bmjopen-2017-016064), 2017-07-10
Supplement: bmjopen-2017-016064.draft_revisions.pdf [file bmjopen-2017-016064.draft_revisions.pdf]

# BMJ Open

## Leisure-time physical activity and circulating 25-hydroxyvitamin D levels in cancer survivors in the NHANES survey

|                                 |                                                                                                                                                                                                                 |
|---------------------------------|-----------------------------------------------------------------------------------------------------------------------------------------------------------------------------------------------------------------|
| Journal:                        | <i>BMJ Open</i>                                                                                                                                                                                                 |
| Manuscript ID                   | bmjopen-2017-016064                                                                                                                                                                                             |
| Article Type:                   | Research                                                                                                                                                                                                        |
| Date Submitted by the Author:   | 25-Jan-2017                                                                                                                                                                                                     |
| Complete List of Authors:       | Yang, Lin; Medizinische Universitat Wien, Epidemiology; Washington University in Saint Louis School of Medicine, Surgery<br>Toriola, Adetunji; Washington University in Saint Louis School of Medicine, Surgery |
| <b>Primary Subject Heading</b>: | Epidemiology                                                                                                                                                                                                    |
| Secondary Subject Heading:      | Oncology                                                                                                                                                                                                        |
| Keywords:                       | cancer survivor, cancer prognosis, vitamin D, physical activity, NHANES                                                                                                                                         |
|                                 |                                                                                                                                                                                                                 |

SCHOLARONE™  
Manuscripts

1  
2  
3 **Title: Leisure-time physical activity and circulating 25-hydroxyvitamin D levels in**  
4 **cancer survivors in the NHANES survey**  
5  
6  
7  
8  
9

10 Lin Yang PhD<sup>1,2</sup>, Adetunji T. Toriola MD, PhD<sup>1</sup>  
11  
12  
13

14  
15 1. The Division of Public Health Sciences, Department of Surgery, Washington  
16 University School of Medicine and Siteman Cancer Center, St Louis, Missouri, USA  
17  
18  
19

20  
21  
22 2. Department of Epidemiology, Medical University of Vienna, Vienna, Austria  
23  
24  
25

26  
27 Correspondence to:  
28

29 Adetunji T. Toriola  
30

31 The Division of Public Health Sciences, Department of Surgery,  
32

33 660 S. Euclid Avenue, Campus Box 8100  
34  
35

36 St. Louis, MO 63110, USA  
37

38 Telephone: (314) 268-2668  
39

40 Email: [toriolaa@wudosis.wustl.edu](mailto:toriolaa@wudosis.wustl.edu)  
41  
42  
43  
44  
45

46  
47 Keywords: cancer survivor, cancer prognosis, vitamin D, physical activity, NHANES  
48  
49

50 Abstract: 281 words  
51  
52

53 Text: 3,169 words  
54  
55  
56  
57  
58  
59  
60

## Abstract

**Objectives:** Circulating 25-hydroxyvitamin D (25-OHD) is associated with improved cancer prognosis, yet it may be a surrogate marker for physical activity. Using data from the National Health and Nutrition Examination Survey (NHANES), we investigated the associations of leisure-time physical activity (LTPA) with circulating 25-OHD levels in cancer survivors, and determined whether associations differ by indoor and outdoor activity.

**Design:** Cross-sectional study.

**Setting:** The US National Health and Nutrition Examination Survey (NHANES).

**Participants:** Cancer survivors with available data on demographic information, measures of adiposity, smoking history, self-reported LTPA, circulating 25-OHD levels in five waves of NHANES (2001-2010).

**Main outcomes measures:** Circulating 25-OHD levels.

**Results:** Multiple linear regression and logistic regression models were used to evaluate the associations of self-reported LTPA with 25-OHD, adjusting for potential confounders. Due to the differences in LTPA measure, the analyses were conducted separately for 2001-2006, and 2007-2010 data. We further estimated associations by indoor and outdoor activity in the 2001-2006 data. There were 1,530 cancer survivors (mean age=60.5 years, mean BMI=28.6 kg/m<sup>2</sup>). The prevalent cancer sites were breast (19.3%), prostate (18.8%), cervix (10.4%), and colon (8.6%). Compared to inactive cancer survivors, being physically active was associated with higher circulating 25-OHD levels; 9.19 nmol/L (95%CI: 5.24 to 13.14), and 9.12nmol/L (95%CI: 1.17 to 17.07) for 2001-2006 and 2007-2010 data, respectively. In the mutually adjusted model, outdoor

1  
2  
3 activity (5.72 nmol/L, 95%CI: 1.34 to 10.09), but not indoor activity (4.11 nmol/L, 95%CI:  
4  
5 -0.87 to 9.08), was associated with statistically significant higher 25-OHD levels. The  
6  
7 interaction between indoor and outdoor activities was not significant (P-value=0.12).  
8  
9

10 **Conclusion:** Physical activity, particularly outdoor activity is associated with higher 25-  
11  
12 OHD levels in cancer survivors. Intervention in cancer survivors may consider including,  
13  
14 and prioritizing outdoor activities.  
15  
16  
17  
18  
19  
20

### 21 **Strengths and limitations of this study**

22  
23

- 24 • To the best of our knowledge, this is the first study to investigate the association  
25 of leisure-time physical activity (LTPA) with circulating 25-hydroxyvitamin D (25-  
26  
27 OHD) levels in cancer survivors. We further compared associations by outdoor  
28  
29 and indoor LTPA.  
30  
31
- 32 • The current study pooled data from cancer survivors in a nationally  
33  
34 representative adult sample in the US.  
35  
36
- 37 • This study controlled for a range of factors that are known to affect circulating 25-  
38  
39 OHD levels.  
40  
41
- 42 • Study limitations includes (1), the cross-sectional nature makes it impossible to  
43  
44 determine a causal effect; (2) season, an important determinant of 25-OHD  
45  
46 levels, was categorized into 2 (winter and summer, rather than winter, summer,  
47  
48 fall and spring); (3) physical activity was self-reported.  
49  
50  
51  
52  
53  
54  
55  
56  
57  
58  
59  
60

## Background

There are >15.5 million cancer survivors in the US and the number is expected to rise to 20 million by 2026.<sup>1</sup> Identifying factors, particularly modifiable factors, that improve prognosis and survival in this rapidly expanding demographic group is, therefore, a high priority.

There is emerging evidence that vitamin D status is associated with improved cancer prognosis and survival, particularly colorectal and breast cancers.<sup>2</sup> Circulating 25-hydroxyvitamin D (25-OHD) is the best indicator of overall vitamin D status because it has a long half-life, is unregulated by homeostatic systems in the body, and reflects total vitamin D from multiple determinants.<sup>2</sup> However, it has been suggested that circulating 25-OHD level may be a surrogate or biological marker for lifestyle factors that impact cancer prognosis, notably physical activity.<sup>2-4</sup> Physical activity, before and after cancer diagnosis, is associated with reduced mortality in cancer survivors,<sup>5-7</sup> although the underlying mechanisms are still being elucidated. In cancer-free population, leisure-time physical activity is associated with an increase in circulating 25-OHD levels; which is thought to reflect exposure to sunlight, a major determinant of circulating 25-OHD levels.<sup>8</sup> In support, studies have reported higher 25-OHD levels for the same amount of outdoor, compared to indoor physical activity,<sup>9</sup> although others have not.<sup>10</sup> Nevertheless, it has also been shown that physical activity and sun exposure may have independent effects on circulating 25-OHD levels, suggesting that indoor physical activity might be sufficient to increase circulating 25-OHD levels through its effect on 25-OHD metabolism, such as 1,25-dihydroxyvitamin.<sup>11-14</sup>

1  
2  
3  
4  
5  
6 To the best of our knowledge, no study has investigated the associations of physical  
7  
8 activity with circulating 25-OHD levels in cancer survivors. Because physical activity  
9  
10 declines after cancer diagnosis, findings in cancer-free population may not apply to  
11  
12 cancer survivors. Using data from the National Health and Nutrition Examination Survey  
13  
14 (NHANES), our objectives are to (i) investigate for the first time the associations of  
15  
16 leisure-time physical activity with circulating 25-OHD levels in cancer survivors, (ii)  
17  
18 determine whether associations differ by indoor and outdoor physical activity. Study  
19  
20 findings could have implications for public health recommendations in cancer survivors  
21  
22 because physical inactivity and vitamin D insufficiency are prevalent among cancer  
23  
24 survivors,<sup>15 16</sup> and understanding the associations between physical activity and vitamin  
25  
26 D could inform cancer survivorship care strategies.  
27  
28  
29  
30  
31  
32  
33  
34  
35  
36  
37  
38  
39  
40  
41  
42  
43  
44  
45  
46  
47  
48  
49  
50  
51  
52  
53  
54  
55  
56  
57  
58  
59  
60

## Methods

### Study Population

The National Health and Nutrition Examination Survey (NHANES) was designed to provide cross-sectional estimates on the prevalence of health, nutrition, and potential risk factors among the civilian non-institutionalized U.S. population up to 85 years of age.<sup>17</sup> In brief, NHANES surveys a nationally representative complex, stratified, multistage, probability clustered sample of about 5,000 participants each year in 15 counties across the country. The NHANES obtained approval from the National Center for Health Statistics Research Ethics Review Board and participants provided written consent.

We extracted demographic information, measures of adiposity, smoking history, self-reported leisure time physical activity, circulating 25-OHD levels, cancer diagnosis, and combined them into a single dataset for each data collection wave. Participants were considered as cancer survivors if they answered “yes” to the question “Have you ever been told by a doctor or other health professional that you had cancer or a malignancy of any kind?” We excluded participants who had non-melanoma skin cancer. This interview question was only given to males and females 20 years or older, subsequently restricted the analysed sample to adult cancer survivors. We created a single dataset for each wave of data from NHANES in 2001 to 2002, 2003 to 2004, 2005 to 2006, 2007 to 2008, and 2009 to 2010, and excluded those who were never diagnosed with cancer, and were pregnant.

### Circulating 25-OHD levels

The process of blood collection is detailed in the NHANES Laboratory/Medical Technologist Procedures Manual.<sup>18</sup> Participants who received chemotherapy within last 4 weeks were excluded from blood collection. Blood samples were collected, processed, stored and shipped to University of Washington, Seattle for testing. The lab method measuring 25-OHD for 2007-2010 changed from 2005-2006 and earlier in NHANES, and has been described previously.<sup>19</sup> Briefly, circulating 25-OHD concentrations were measured at the National Center for Environmental health, CDC, Atlanta, GA using the DiaSorin RIA kit (Stillwater, MN) between 2001 and 2006. We converted the 25-OHD data in 2001-2006 using provided regression to equivalent 25-OHD measurement from a standardized liquid chromatography-tandem mass spectrometry (LC-MS/MS) method, which was used in the analysis of 25-OHD in NHANES 2007-2010 data. This standardization procedure therefore ensures that 25-OHD data is comparable between 2001-2006 and 2007-2010.

Continuous 25-OHD data was used in linear regression models and categorized as low (<50 nmol/L) and high (≥50 nmol/L) 25-OHD in logistic regression models, based on definitions of vitamin D insufficiency.<sup>20</sup>

### Socio-demographic characteristics

Socio-demographic characteristics including age, sex, race and ethnicity, and smoking status were extracted. Based on self-reported race and ethnicity, participants were classified into one of the three racial groups: Non-Hispanic White, Non-Hispanic Black,



1  
2  
3 and Hispanic and others. We classified participants into three groups: never smokers  
4 (did not smoke 100 cigarettes and do not smoke now), former smokers (smoked 100  
5 cigarettes in life and do not smoke now), and current smokers (smoked 100 cigarettes  
6 in life and smoke now).  
7  
8  
9  
10  
11

### 12 13 14 15 Body mass index (BMI)

16  
17 Weight and height were measured at the time of physical examination in a mobile  
18 examination centre or in the participant's home. The measurements followed standard  
19 procedures and were carried out by trained technicians using standardized equipment.  
20  
21 BMI was calculated as weight in kg/(height in meters)<sup>2</sup>. We categorized study  
22 participants into standard BMI categories: underweight (<18.5kg/m<sup>2</sup>), normal weight  
23 (18.5-24.9 kg/m<sup>2</sup>), overweight (25.0 – 29.9 kg/m<sup>2</sup>), and obese (≥30.0 kg/m<sup>2</sup>). For  
24 analytic purposes, we combined those who were underweight and those who had  
25 normal weight into 1 category (≤25 kg/m<sup>2</sup>).  
26  
27  
28  
29  
30  
31  
32  
33  
34  
35  
36  
37  
38

### 39 Season of blood draw

40  
41 Blood samples were collected at the time of physical examination in a mobile  
42 examination or in the participants' home. Season of blood draw was determined from  
43 the documented month of physical examination. Months were reported in two groups:  
44 November 1<sup>st</sup> through April 30<sup>th</sup>, or May 1<sup>st</sup> through October 31<sup>st</sup>, and classified into  
45 winter or summer, respectively.<sup>9</sup>  
46  
47  
48  
49  
50  
51  
52  
53  
54

### 55 Self-reported leisure-time physical activity (LTPA)

1  
2  
3 The assessment on self-reported physical activity for 2007-2010 changed from 2005-  
4  
5 2006 and earlier. There is no conversion provided between two assessments, therefore  
6  
7 analyses for LTPA were conducted separately in 2001 – 2006 data, and 2007 – 2010  
8  
9 data.  
10  
11

12  
13  
14  
15 In 2001-2006 data, participants self-reported specific LTPA in the past 30 days from a  
16  
17 list of 48 activities, that if they engaged in certain activities, and the frequencies and  
18  
19 durations of these activities. Each activity was coded into a metabolic equivalent task  
20  
21 (MET) score based on the 2011 Compendium of Physical Activities, a valid and globally  
22  
23 used instrument to quantify the energy expenditure of physical activity in adults.<sup>21</sup> For  
24  
25 each reported activity, MET-minutes per week (MET-min/week) were calculated by  
26  
27 multiplying the MET value of each reported activity by the minutes spent in the activity  
28  
29 per seven days. Overall LTPA was summarized as the total MET-minutes per week of  
30  
31 all reported activities.<sup>22</sup> Cancer survivors were classified as inactive (zero MET-  
32  
33 min/week), insufficiently active (<750 MET-min/week), and sufficiently active (≥750  
34  
35 MET-min/week) based on the standard definition.<sup>22</sup> In addition, we categorized each of  
36  
37 the 48 listed activities into outdoor (e.g., walking, jogging, fishing) or indoor (e.g.,  
38  
39 aerobics, bowling, weights) activity. Activities that could be either indoor or outdoor  
40  
41 (e.g., bicycling, swimming) were classified as indoor to ensure a conservative estimation  
42  
43 of the associations between outdoor LTPA and 25-OHD. Both indoor and outdoor LTPA  
44  
45 were summarized in MET-min/week, then classified as inactive (zero MET-min/week),  
46  
47 insufficiently active (<450 MET-min/week), and sufficiently active (≥MET-min/week). We  
48  
49 used 450 MET-min/week as the cut-off given is the minimal goal of weekly LTPA.<sup>22</sup>  
50  
51  
52  
53  
54  
55  
56  
57  
58  
59  
60

1  
2  
3  
4  
5  
6 In the 2007-2010 data, participants self-reported their daily activities, leisure time  
7  
8 activities, and sedentary activities, using questions based on the Global Physical  
9  
10 Activity Questionnaire (GPAQ).<sup>23</sup> Levels of LTPA were calculated as the minutes per  
11  
12 week that participants reported participating in moderate-to-vigorous-intensity physical  
13  
14 activity (MVPA). Participants reported the number of days and minutes spent in  
15  
16 moderate recreational and vigorous recreational activities in a typical week, by  
17  
18 answering questions “In a typical week, on how many days do you do vigorous-intensity  
19  
20 sports, fitness or recreational activities?”, “Minutes vigorous recreational activities”, “In a  
21  
22 typical week, on how many days do you do moderate-intensity sports, fitness or  
23  
24 recreational activities?”, and “Minutes moderate recreational activities”. We summarized  
25  
26 the total number of minutes for both activities, where the number of minutes spent in  
27  
28 vigorous-intensity physical activity were doubled and added to the number of minutes of  
29  
30 moderate-intensity physical activity to approximately equivalent the MET value.<sup>24</sup>  
31  
32  
33  
34  
35  
36 Cancer survivors were classified as inactive (zero min/week MVPA), insufficiently active  
37  
38 (<150 min/week MVPA), and sufficiently active ( $\geq$ 150 min/week MVPA) based on the  
39  
40 physical activity guidelines for cancer survivors.<sup>25</sup>  
41  
42  
43  
44  
45  
46  
47  
48  
49  
50  
51  
52  
53  
54  
55  
56  
57  
58  
59  
60

## Statistical Analysis

Survey analysis procedures were used to account for the sample weights, stratification, and clustering of the complex sampling design to ensure nationally representative estimates. Information on socio-demographic characteristics, weight, height, season of blood draw, and self-reported LTPA was complete among cancer survivors who had available data on circulating 25-OHD levels. We calculated the descriptive statistics for participants' characteristics and LTPA categories by 25-OHD levels separately in 2001-2006 data, and 2007-2010 data. We summarized weighted means and standard errors for continuous variables, and weighted proportions for categorical variables.

We estimated linear associations between LTPA and 25-OHD in 2001-2006 data, and 2007-2010 data, respectively. The multiple linear regression models for LTPA were adjusted for age, sex, race, BMI, smoking status, and season of blood draw. In 2001-2006 data, we further estimated the linear associations between LTPA and 25-OHD separately by indoor and outdoor activities. In the multiple linear regression models, we simultaneously adjusted for both indoor and outdoor activities, provided they were significantly different ( $P$  value  $< 0.001$ ). We tested for differences between the indoor and outdoor effects by including both in the regression model and testing for interaction. We examined the normality of residuals by kernel density estimate and standardized normal probability plots for all the linear regression models. Using logistic regression models, we conducted similar analyses treating 25-OHD level as a binary outcome ( $< 50$  nmol/L vs.  $\geq 50$  nmol/L) to estimate the odds ratios of the associations between LTPA and 25-OHD in the 2001-2006 and 2007-2010 data.

1  
2  
3 All statistical significance was set at  $p < 0.05$ . All statistical analyses were performed  
4  
5 using Stata version 14.0 (STATA Corp., College Station, Texas, USA).  
6  
7  
8  
9  
10  
11  
12  
13  
14  
15  
16  
17  
18  
19  
20  
21  
22  
23  
24  
25  
26  
27  
28  
29  
30  
31  
32  
33  
34  
35  
36  
37  
38  
39  
40  
41  
42  
43  
44  
45  
46  
47  
48  
49  
50  
51  
52  
53  
54  
55  
56  
57  
58  
59  
60

For peer review only

## Results

Our study population consisted of 1,530 cancer survivors who had data on circulating 25-OHD levels. The most prevalent cancer sites were breast cancer (19.3%), prostate (18.8%), cervix (10.4%), and colon (8.6%). Participants' mean age at the time of baseline examination was 60.5 years, and their mean BMI was 28.6 kg/m<sup>2</sup>. We observed statistically significant differences in circulating 25-OHD levels (<50 nmol/L vs. ≥50 nmol/L) for most characteristics, except for age, and sex (Tables 1 (2001-2006) and 2 (2007-2010)). Cancer survivors who were obese, Non-Hispanic Black, or smokers had lower 25-OHD levels than those who had normal weight, Non-Hispanic White or Hispanic and who were non-smokers, respectively.

[Insert Table 1 and Table 2]

### Associations between LTPA and Circulating 25-OHD levels

Tables 3 and 4 summarized both the non-adjusted and adjusted associations between LTPA and circulating 25-OHD in linear regression and logistic regression models, respectively. Because LTPA measure differed between 2001-2006 and 2007-2010 and there is no conversion between the two, it is not possible to compare the findings between two study phrases directly. Cancer survivors who were sufficiently active had higher circulating 25-OHD levels than those who were inactive. This translated to 9.19 nmol/L (95% CI: 5.24 to 13.14) higher 25-OHD levels in 2001-2006 phase, and 9.12 nmol/L (95% CI: 1.17 to 17.07) higher in 2007-2010 phase in the multivariable-adjusted models. Compared to inactive, being insufficiently active was associated with 4.83 nmol/L (95% CI: 0.41 to 9.25) higher level of 25-OHD in 2001-2006 data. Furthermore,

1  
2  
3 the comprehensive data on a list of 48 activities collected in 2001-2006 allowed us to  
4  
5 extend the analyses to compare between indoor and outdoor LTPA in relation to 25-  
6  
7 OHD levels. In the non-adjusted models (Table 3), higher levels of indoor and outdoor  
8  
9 LTPA both were associated with higher 25-OHD levels. However, in multivariable-  
10  
11 adjusted models (that also mutually adjusted for indoor and outdoor LTPA), the  
12  
13 association was only statistically significant among cancer survivors who engaged in  
14  
15 outdoor LTPA (5.72 nmol/L, 95% CI: 1.34 to 10.09). The interaction between indoor and  
16  
17 outdoor activities was not significant (P-value=0.12). Analyses using logistic regression  
18  
19 models were supportive. Outdoor LTPA was lower in Non-Hispanic Black (69.2%  
20  
21 inactive vs. 51.5% inactive among Non-Hispanic Whites, and 43.2% inactive among  
22  
23 Hispanics) (Data not shown).  
24  
25  
26  
27  
28  
29  
30  
31

32 [Insert Table 3 and Table 4]  
33  
34  
35  
36  
37  
38  
39  
40  
41  
42  
43  
44  
45  
46  
47  
48  
49  
50  
51  
52  
53  
54  
55  
56  
57  
58  
59  
60

## Discussion

We observed that being physically active was associated with higher circulating 25-OHD levels in cancer survivors. However, further analyses showed that the elevated 25-OHD levels were only statistically significant among cancer survivors who engaged in outdoor physical activity.

To the best of our knowledge, this is the first study to evaluate the associations of physical activity with circulating 25-OHD levels in cancer survivors. Our findings are, however, similar to what has been reported among non-cancer participants enrolled in NHANES (1988-1994).<sup>9</sup> Scargg and Camargo reported a 9.6 nmol/L increase in 25-OHD levels among participants who engaged in outdoor LTPA compared to those who did not engage in outdoor LTPA. The increase in 25-OHD levels associated with outdoor LTPA is higher than what we observed in our study population (5.72 nmol/L higher 25-OHD). This could be due to the different ways LTPA was categorized. The most active group in their study translates to participating daily in outdoor activity, whilst only 5.6% (weighted proportion) of cancer survivors in our sample achieved this physical activity level. To compare at an equivalently active level, our findings of a 5.72 nmol/L increase in cancer survivors is similar to 6.1 nmol/L higher 25-OHD level in individuals who were at a similar activity level (engaged in 13-30 times outdoor LTPA per month) reported by Scargg and Camargo.<sup>9</sup> A more recent analysis using NHANES 2003-2006 data reported increasing level of 25-OHD associated with higher level of objectively measured moderate-to-vigorous physical activity, but the association was not stronger for outdoor LTPA compared to indoor when using self-reported data.<sup>10</sup>



1  
2  
3 It is unclear whether physical activity has direct or indirect effects on 25-OHD levels.  
4  
5 Sun exposure is the major determinant of circulating 25-OHD levels, hence, it is  
6  
7 possible that physical activity may indirectly impact 25-OHD levels through increased  
8  
9 sun exposure associated with outdoor activity<sup>26</sup> among active individuals; yet few  
10  
11 studies have measured activities specifically to outdoor, or able to adjusted for sun  
12  
13 exposure.<sup>9 10 27 28</sup> On the other hand, physical activity may directly impact 25-OHD  
14  
15 metabolism. Zittermann and colleagues<sup>11</sup> reported higher calcium absorption rates and  
16  
17 plasma calcitriol levels in exercise-trained young men compared to age-matched  
18  
19 sedentary controls. Similarly, in a small study, young males who underwent muscle-  
20  
21 building exercise (indoor) for at least 1 year had higher circulating 25-OHD, Gla-protein,  
22  
23 and 1,25-dihydroxyvitamin levels compared to age-matched controls who received  
24  
25 constant daily diet same as the exercise group.<sup>13</sup> However, whether this mechanism  
26  
27 operates in cancer survivors is unclear, because of the physiological, biological and  
28  
29 behavioral alterations associated with cancer, and cancer treatment.<sup>25</sup>  
30  
31  
32  
33  
34  
35  
36  
37  
38

39 We observed statistically significant higher circulating 25-OHD levels associated with  
40  
41 outdoor, but not with indoor, LTPA in the mutually adjusted model. Nevertheless, no  
42  
43 statistically significant interaction between indoor and outdoor LTPA was observed. It is  
44  
45 likely that LTPA influence 25-OHD via multiple pathways, possibly both an indirect effect  
46  
47 due to sun exposure and a direct impact on 25-OHD metabolism. However this warrants  
48  
49 further investigation using precise measures of physical activity<sup>29</sup> and taking into  
50  
51 consideration sun exposure, seasonality, and other vitamin D metabolites.  
52  
53  
54  
55  
56  
57  
58  
59  
60

1  
2  
3 The main strength of this analysis is pooling cancer survivors from a nationally  
4 representative adult sample in the US. We aggregated five waves' data and achieved a  
5 fairly sizeable sample. In addition, we controlled for a range of factors that are known to  
6 affect the circulating 25-OHD levels. Further, we were able to compare associations of  
7 LTPA with 25-OHD by outdoor and indoor LTPA, thereby providing further insights on  
8 the associations of LTPA with 25-OHD levels.  
9  
10  
11  
12  
13  
14  
15  
16  
17  
18  
19

20 There are a number of limitations to this study. First, the cross-sectional nature makes it  
21 impossible to determine a causal effect. Second, season, an important determinant of  
22 25-OHD levels, was only available in two categories. Solar radiation, required for skin to  
23 synthesize vitamin D, is weaker in winter compared to summer. However, there were no  
24 statistically significantly differences between winter (Southern states) and summer  
25 (Northern states) 25-OHD levels in our study population, probably owing to the timing of  
26 blood collection in each region. The NHANES study collected blood samples in the  
27 Southern states during winter, and in the Northern states during summer. Third, we  
28 were not able to conduct analyses stratified by cancer type or time since diagnosis  
29 because of the limited number of individual cancers. Finally, physical activity was self-  
30 reported. However, any bias arising from this is likely to be non-differential.  
31  
32  
33  
34  
35  
36  
37  
38  
39  
40  
41  
42  
43  
44  
45  
46  
47

48 Our findings of an association between LTPA and 25-OHD, that was stronger for  
49 outdoor LTPA compared to indoor LTPA has implications for public health  
50 recommendations in cancer survivors. Although the casual relationship of 25-OHD with  
51 cancer survival is yet unclear, strong evidence supports the benefits of physical activity  
52  
53  
54  
55  
56  
57  
58  
59  
60

1  
2  
3 in improved cancer survival and the quality of life during survival.<sup>29 30</sup> Our findings  
4 suggest that 25-OHD might be a surrogate marker of physical activity that accounts for  
5 the direct and indirect effects of LTPA, particularly outdoor. The proportion of cancer  
6 survivors in NHANES who did not engage in any LTPA was high, especially in the 2007-  
7 2010 (53.3%) compared to the 2001-2006 wave (38.3%). This observed decline in  
8 LTPA might be attributed to the difference in measures and may not reflect an actual  
9 change in LTPA levels, i.e. the 2001-2006 measure is comprised of 48 activity items  
10 whilst the 2007-2010 measure queries general physical activity participation. In fact, an  
11 increase in the physical activity level in the US population from 2001 to 2011 has been  
12 reported from the BRFSS data,<sup>31</sup> though this trend may not hold true in cancer survivors.  
13  
14 Guidelines from the American Cancer Society<sup>25</sup> and American College of Sports  
15 Medicine<sup>32</sup> suggest that cancer survivors should follow the physical activity guidelines  
16 for Americans with specific exercise programming adaptations based on disease- and  
17 treatment-related adverse effects. However, physical activity levels in these populations  
18 are critically low during and after treatment.<sup>33</sup> Effort in designing physical activity  
19 interventions specifically to cancer survivors may consider including and prioritizing  
20 outdoor activities with the potentially benefits of sun exposure. Notably, given the well-  
21 documented differences in cancer prognosis between non-Hispanic Blacks and other  
22 racial groups, and the emerging associations of vitamin D with cancer prognosis,  
23 physical activity interventions incorporating outdoor activities might be particularly  
24 important for cancer survival among non-Hispanic Blacks.  
25  
26  
27  
28  
29  
30  
31  
32  
33  
34  
35  
36  
37  
38  
39  
40  
41  
42  
43  
44  
45  
46  
47  
48  
49  
50  
51  
52  
53  
54  
55  
56  
57  
58  
59  
60

1  
2  
3 In conclusion, physical activity, particularly outdoor physical activity is associated with  
4 higher 25-OHD levels in cancer survivors. This adds to the potential health benefits of  
5 being physically active. Non-Hispanic Black cancer survivors, who are more likely to  
6 have vitamin D deficiency, were less likely to engage in outdoor LTPA. Because of the  
7 established survival advantage associated with physical activity, and the emerging role  
8 of vitamin D in cancer prognosis, physical activity interventions in cancer survivors may  
9 consider including, and prioritizing outdoor activities.  
10  
11  
12  
13  
14  
15  
16  
17  
18  
19  
20  
21  
22  
23  
24  
25  
26  
27  
28  
29  
30  
31  
32  
33  
34  
35  
36  
37  
38  
39  
40  
41  
42  
43  
44  
45  
46  
47  
48  
49  
50  
51  
52  
53  
54  
55  
56  
57  
58  
59  
60

1  
2  
3 **Funding:** This work was supported by the Transdisciplinary Research on Energetics and  
4 Cancer (TREC) Center at Washington University in St. Louis (LY). The TREC Center is  
5 funded by the National Cancer Institute at NIH (U54 CA155496) and the Foundation for  
6 Barnes-Jewish Hospital, and Siteman Cancer center (ATT).  
7  
8  
9  
10  
11  
12

13  
14  
15 **Competing interests:** None declared.  
16  
17

18  
19  
20 **Ethics approval:** National Center for Health Statistics Research Ethics Review Board  
21 Approval.  
22  
23  
24

25  
26  
27 **Contributors:** LY and ATT conceived and designed study, analysed and interpreted  
28 data, drafted and reviewed manuscript.  
29  
30  
31

32  
33  
34 **Data sharing statement:** The NHNAES data are publically available at  
35 <https://wwwn.cdc.gov/nchs/nhanes/Default.aspx>.  
36  
37  
38  
39  
40  
41  
42  
43  
44  
45  
46  
47  
48  
49  
50  
51  
52  
53  
54  
55  
56  
57  
58  
59  
60

## REFERENCES

1. Miller KD, Siegel RL, Lin CC, et al. Cancer treatment and survivorship statistics, 2016. *CA: a cancer journal for clinicians* 2016;**66**(4):271-89.
2. Toriola AT, Nguyen N, Scheitler-Ring K, et al. Circulating 25-hydroxyvitamin D levels and prognosis among cancer patients: a systematic review. *Cancer epidemiology, biomarkers & prevention : a publication of the American Association for Cancer Research, cosponsored by the American Society of Preventive Oncology* 2014;**23**(6):917-33.
3. Ulrich CM, Holmes RS. Shedding light on colorectal cancer prognosis: vitamin d and beyond. *Journal of clinical oncology : official journal of the American Society of Clinical Oncology* 2008;**26**(18):2937-9.
4. Autier P, Boniol M, Pizot C, et al. Vitamin D status and ill health: a systematic review. *The lancet Diabetes & endocrinology* 2014;**2**(1):76-89.
5. Ballard-Barbash R, Friedenreich CM, Courneya KS, et al. Physical activity, biomarkers, and disease outcomes in cancer survivors: a systematic review. *Journal of the National Cancer Institute* 2012;**104**(11):815-40.
6. Schmid D, Leitzmann MF. Association between physical activity and mortality among breast cancer and colorectal cancer survivors: a systematic review and meta-analysis. *Annals of oncology : official journal of the European Society for Medical Oncology* 2014;**25**(7):1293-311.
7. Arem H, Moore SC, Park Y, et al. Physical activity and cancer-specific mortality in the NIH-AARP Diet and Health Study cohort. *International journal of cancer* 2014;**135**(2):423-31.
8. Brock K, Huang WY, Fraser DR, et al. Low vitamin D status is associated with physical inactivity, obesity and low vitamin D intake in a large US sample of healthy middle-aged men and women. *The Journal of steroid biochemistry and molecular biology* 2010;**121**(1-2):462-6.
9. Scragg R, Camargo CA, Jr. Frequency of leisure-time physical activity and serum 25-hydroxyvitamin D levels in the US population: results from the Third National Health and Nutrition Examination Survey. *American journal of epidemiology* 2008;**168**(6):577-86; discussion 87-91.
10. Wannier M, Richard A, Martin B, et al. Associations between objective and self-reported physical activity and vitamin D serum levels in the US population. *Cancer causes & control : CCC* 2015;**26**(6):881-91.
11. Zittermann A, Sabatschus O, Jantzen S, et al. Exercise-trained young men have higher calcium absorption rates and plasma calcitriol levels compared with age-matched sedentary controls. *Calcified tissue international* 2000;**67**(3):215-9.
12. Yeh JK, Aloia JF, Yasumura S. Effect of physical activity on calcium and phosphorus metabolism in the rat. *The American journal of physiology* 1989;**256**(1 Pt 1):E1-6.
13. Bell NH, Godsen RN, Henry DP, et al. The effects of muscle-building exercise on vitamin D and mineral metabolism. *Journal of bone and mineral research : the official journal of the American Society for Bone and Mineral Research* 1988;**3**(4):369-73.
14. Klausen T, Breum L, Sorensen HA, et al. Plasma levels of parathyroid hormone, vitamin D, calcitonin, and calcium in association with endurance exercise. *Calcified tissue international* 1993;**52**(3):205-8.
15. Teleni L, Baker J, Koczwara B, et al. Clinical outcomes of vitamin D deficiency and supplementation in cancer patients. *Nutrition reviews* 2013;**71**(9):611-21.

16. Churilla TM, Lesko SL, Brereton HD, et al. Serum vitamin D levels among patients in a clinical oncology practice compared to primary care patients in the same community: a case-control study. *BMJ open* 2011;**1**(2):e000397.
17. Centers for Disease Control and Prevention. National Health and Nutrition Examination Survey. <http://www.cdc.gov/nchs/nhanes.htm>. Accessed June 21, 2016.
18. Centers for Disease Control and Prevention. NHANES Laboratory/Medical Technologists Procedures Manual -[https://www.cdc.gov/nchs/data/nhanes/nhanes\\_09\\_10/lab.pdf](https://www.cdc.gov/nchs/data/nhanes/nhanes_09_10/lab.pdf), Accessed June 21, 2016. 2009.
19. Centers for Disease Control and Prevention. Analytical Note for 25-Hydroxyvitamin D Data Analysis using NHANES III (1988-1994), NHANES 2001-2006, and NHANES 2007-2010 - <http://www.cdc.gov/nchs/nhanes/VitaminDAnalyticalNote.aspx>, Accessed June 21, 2016. 2015.
20. Institute of Medicine Committee to Review Dietary Reference Intakes for Vitamin D, Calcium. The National Academies Collection: Reports funded by National Institutes of Health. In: Ross AC, Taylor CL, Yaktine AL, et al., eds. Dietary Reference Intakes for Calcium and Vitamin D. Washington (DC): National Academies Press (US) National Academy of Sciences., 2011.
21. Ainsworth BE, Haskell WL, Herrmann SD, et al. 2011 Compendium of Physical Activities: a second update of codes and MET values. *Medicine and science in sports and exercise* 2011;**43**(8):1575-81.
22. Navaneethan SD, Kirwan JP, Arrigain S, et al. Overweight, obesity and intentional weight loss in chronic kidney disease: NHANES 1999-2006. *International journal of obesity (2005)* 2012;**36**(12):1585-90.
23. Hallal PC, Andersen LB, Bull FC, et al. Global physical activity levels: surveillance progress, pitfalls, and prospects. *Lancet (London, England)* 2012;**380**(9838):247-57.
24. Zhao G, Li C, Ford ES, et al. Leisure-time aerobic physical activity, muscle-strengthening activity and mortality risks among US adults: the NHANES linked mortality study. *British journal of sports medicine* 2014;**48**(3):244-9.
25. Rock CL, Doyle C, Demark-Wahnefried W, et al. Nutrition and physical activity guidelines for cancer survivors. *CA: a cancer journal for clinicians* 2012;**62**(4):243-74.
26. Holick MF. Vitamin D deficiency. *The New England journal of medicine* 2007;**357**(3):266-81.
27. Scragg R, Holdaway I, Singh V, et al. Serum 25-hydroxyvitamin D3 is related to physical activity and ethnicity but not obesity in a multicultural workforce. *Australian and New Zealand journal of medicine* 1995;**25**(3):218-23.
28. Florez H, Martinez R, Chacra W, et al. Outdoor exercise reduces the risk of hypovitaminosis D in the obese. *The Journal of steroid biochemistry and molecular biology* 2007;**103**(3-5):679-81.
29. Skender S, Schrotz-King P, Bohm J, et al. Repeat physical activity measurement by accelerometry among colorectal cancer patients--feasibility and minimal number of days of monitoring. *BMC research notes* 2015;**8**:222.
30. Strasser B, Steindorf K, Wiskemann J, et al. Impact of resistance training in cancer survivors: a meta-analysis. *Medicine and science in sports and exercise* 2013;**45**(11):2080-90.
31. Dwyer-Lindgren L, Freedman G, Engell RE, et al. Prevalence of physical activity and obesity in US counties, 2001-2011: a road map for action. *Population health metrics* 2013;**11**:7.

- 1  
2  
3  
4  
5  
6  
7  
8  
9  
10  
11  
12  
13  
14  
15  
16  
17  
18  
19  
20  
21  
22  
23  
24  
25  
26  
27  
28  
29  
30  
31  
32  
33  
34  
35  
36  
37  
38  
39  
40  
41  
42  
43  
44  
45  
46  
47  
48  
49  
50  
51  
52  
53  
54  
55  
56  
57  
58  
59  
60
32. Schmitz KH, Courneya KS, Matthews C, et al. American College of Sports Medicine roundtable on exercise guidelines for cancer survivors. *Medicine and science in sports and exercise* 2010;**42**(7):1409-26.
33. Huy C, Schmidt ME, Vrieling A, et al. Physical activity in a German breast cancer patient cohort: one-year trends and characteristics associated with change in activity level. *European journal of cancer (Oxford, England : 1990)* 2012;**48**(3):297-304.

For peer review only



Table 1. Socio-demographic Characteristics and Leisure Time Physical Activity of Cancer Survivors Aged 20 years or Older from the NHANES (2001 - 2006), by Circulating 25-OHD levels (n=793)

| 2001-2006                             | N           | Overall    | Circulating 25-OHD |               | P-value |
|---------------------------------------|-------------|------------|--------------------|---------------|---------|
|                                       |             |            | <50<br>nmol/L      | ≥50<br>nmol/L |         |
|                                       |             | 791        | 258                | 533           |         |
| Age (year)                            | Mean (s.e.) | 60.3 (0.6) | 60.2 (1.0)         | 60.1 (0.8)    | 0.93    |
| BMI                                   |             |            |                    |               | 0.001   |
| <18.5                                 | %           | 1.9        | 22.2               | 77.8          |         |
| 18.5 – 24.9                           | %           | 32.7       | 26.0               | 74.0          |         |
| 25.0 – 29.9                           | %           | 32.1       | 18.2               | 81.8          |         |
| ≥ 30                                  | %           | 33.3       | 37.6               | 62.4          |         |
| Season                                |             |            |                    |               | 0.06    |
| Winter (November to April)            | %           | 34.3       | 33.4               | 66.6          |         |
| Summer (May to October)               | %           | 65.7       | 24.1               | 75.9          |         |
| Sex                                   |             |            |                    |               | 0.63    |
| Male                                  | %           | 32.7       | 26.0               | 74.0          |         |
| Female                                | %           | 67.3       | 28.0               | 72.0          |         |
| Race                                  |             |            |                    |               | <.001   |
| Non-Hispanic white                    | %           | 86.1       | 22.8               | 77.2          |         |
| Non-Hispanic black                    | %           | 6.6        | 67.0               | 33.0          |         |
| Hispanic and other                    | %           | 7.3        | 44.8               | 55.2          |         |
| Smoking                               |             |            |                    |               | 0.02    |
| Never smoked                          | %           | 39.1       | 23.8               | 76.2          |         |
| Former smoker                         | %           | 39.8       | 25.3               | 74.7          |         |
| Current smoker                        | %           | 21.1       | 37.6               | 62.4          |         |
| Leisure time physical activity (LTPA) |             |            |                    |               | <.001   |
| Inactive                              | %           | 38.2       | 37.7               | 62.3          |         |
| Insufficiently Active                 | %           | 33.0       | 25.6               | 74.4          |         |
| Sufficiently Active                   | %           | 28.8       | 15.5               | 84.5          |         |
| Indoor LTPA                           |             |            |                    |               | 0.02    |
| Inactive                              | %           | 61.7       | 32.0               | 68.0          |         |
| Insufficiently Active                 | %           | 18.2       | 20.3               | 79.7          |         |
| Sufficiently Active                   | %           | 20.1       | 19.2               | 80.8          |         |
| Outdoor LTPA                          |             |            |                    |               | <.001   |
| Inactive                              | %           | 52.0       | 35.4               | 64.6          |         |
| Insufficiently Active                 | %           | 22.0       | 19.7               | 80.3          |         |
| Sufficiently Active                   | %           | 26.0       | 17.6               | 82.4          |         |

Table 2. Socio-demographic Characteristics and Leisure Time Physical Activity of Cancer Survivors Aged 20 years or Older from the NHANES (2007- 2010), by Circulating 25-OHD level (n=737)

|                                       | N           | Circulating 25-OHD |            | P-value    |            |
|---------------------------------------|-------------|--------------------|------------|------------|------------|
|                                       |             | Overall            | <50 nmol/L |            | ≥50 nmol/L |
| 2007-2010*                            | 737         | 206                | 531        |            |            |
| Age (year)                            | Mean (s.e.) | 60.8 (0.7)         | 58.7 (1.3) | 61.4 (0.8) | 0.08       |
| BMI                                   |             |                    |            |            | 0.04       |
| <18.5                                 | %           | 2.0                | 22.3       | 77.7       |            |
| 18.5 – 24.9                           | %           | 27.2               | 17.7       | 82.3       |            |
| 25.0 – 29.9                           | %           | 34.0               | 17.7       | 82.3       |            |
| ≥ 30                                  | %           | 36.8               | 28.0       | 72.0       |            |
| Season                                |             |                    |            |            | 0.1        |
| Winter (November to April)            | %           | 32.6               | 25.4       | 74.6       |            |
| Summer (May to October)               | %           | 67.4               | 19.8       | 80.2       |            |
| Sex                                   |             |                    |            |            | 0.03       |
| Male                                  | %           | 37.8               | 17.1       | 82.9       |            |
| Female                                | %           | 62.2               | 24.3       | 75.7       |            |
| Race                                  |             |                    |            |            | <.001      |
| Non-Hispanic white                    | %           | 82.6               | 15.2       | 84.8       |            |
| Non-Hispanic black                    | %           | 8.2                | 54.3       | 45.7       |            |
| Hispanic and other                    | %           | 9.2                | 49.9       | 50.1       |            |
| Smoking                               |             |                    |            |            | 0.01       |
| Never smoked                          | %           | 47.5               | 22.1       | 77.9       |            |
| Former smoker                         | %           | 35.1               | 16.0       | 84.0       |            |
| Current smoker                        | %           | 17.4               | 31.5       | 68.5       |            |
| Leisure time physical activity (LTPA) |             |                    |            |            | 0.009      |
| Inactive                              | %           | 53.3               | 28.1       | 71.9       |            |
| Insufficiently Active                 | %           | 16.6               | 17.5       | 82.5       |            |
| Sufficiently Active                   | %           | 30.1               | 12.4       | 87.6       |            |

Table 3. Associations between Leisure-Time Physical Activity and Circulating 25-OHD level from Unadjusted and Adjusted Multiple Linear Regression models among Cancer Survivors Aged 20 years or Older from the NHANES (2001 - 2010).

| 2001-2006* (n=793) |                                       | Circulating 25-OHD (nmol/L)  |         |                                      |         |
|--------------------|---------------------------------------|------------------------------|---------|--------------------------------------|---------|
|                    |                                       | Unadjusted linear regression |         | Adjusted multiple linear regression† |         |
|                    |                                       | Beta-coefficient (95% CI)    | P-value | Beta-coefficient (95% CI)            | P-value |
| Model 1:           | Leisure time physical activity (LTPA) |                              |         |                                      |         |
|                    | Inactive                              | reference                    |         | reference                            |         |
|                    | Insufficiently Active                 | 7.36 (2.65 to 12.07)         | 0.003   | 4.83 (0.41 to 9.25)                  | 0.03    |
|                    | Sufficiently Active                   | 12.16 (7.29 to 17.04)        | <.001   | 9.19 (5.24 to 13.14)                 | <.001   |
|                    | P for trend                           |                              | <.001   |                                      | <.001   |
| Model 2:           | Outdoor physical activity             |                              |         |                                      |         |
|                    | Inactive                              | reference                    |         | reference                            |         |
|                    | Insufficiently Active                 | 9.10 (5.15 to 13.04)         | <.001   | 6.69 (2.52 to 10.87)                 | 0.002   |
|                    | Sufficiently Active                   | 8.84 (4.16 to 13.52)         | <.001   | 5.72 (1.34 to 10.09)                 | 0.01    |
|                    | P for trend                           |                              | <.001   |                                      | 0.007   |
|                    | Indoor physical activity              |                              |         |                                      |         |
|                    | Inactive                              | reference                    |         | reference                            |         |
|                    | Insufficiently Active                 | 3.15 (-1.63 to 7.94)         | 0.2     | -0.69 (-4.57 to 3.18)                | 0.72    |
|                    | Sufficiently Active                   | 8.22 (2.50 to 13.93)         | 0.006   | 4.11 (-0.87 to 9.08)                 | 0.10    |
|                    | P for trend                           |                              | 0.004   |                                      | 0.11    |
| 2007-2010* (n=737) |                                       | Circulating 25-OHD (nmol/L)  |         |                                      |         |
|                    |                                       | Unadjusted linear regression |         | Adjusted multiple linear regression† |         |
|                    |                                       | Beta-coefficient (95% CI)    | P-value | Beta-coefficient (95% CI)            | P-value |
| Model 3:           | Leisure time physical activity (LTPA) |                              |         |                                      |         |
|                    | Inactive                              | reference                    |         | reference                            |         |
|                    | Insufficiently Active                 | 8.80 (-2.67 to 20.26)        | 0.13    | 7.45 (-2.74 to 17.64)                | 0.15    |
|                    | Sufficiently Active                   | 12.04 (5.24 to 18.84)        | 0.001   | 9.12 (1.17 to 17.07)                 | 0.03    |
|                    | P for trend                           |                              | 0.001   |                                      | 0.02    |

\*Leisure-time physical activity (LTPA) data analyzed separately due to the changes in self-reported LTPA measures from wave 2005 - 2006 to 2007-2008.

†Adjusted for age, sex, race, body mass index, and smoking status.

Table 4. Associations between Leisure-Time Physical Activity and Circulating 25-OHD level from Unadjusted and Adjusted Logistic Regression models among Cancer Survivors Aged 20 years or Older from the NHANES (2001 - 2010).

| 2001-2006*                                          |                                       | Circulating 25-OHD $\geq$ 50 nmol/L (n=534) |         |                                         |         |
|-----------------------------------------------------|---------------------------------------|---------------------------------------------|---------|-----------------------------------------|---------|
| Reference:<br>Circulating 25-OHD <50 nmol/L (n=259) |                                       | Unadjusted logistic regressions             |         | Adjusted multiple logistic regressions† |         |
|                                                     |                                       | Odds ratio (95% CI)                         | P-value | Odds ratio (95% CI)                     | P-value |
| Model 1:                                            | Leisure time physical activity (LTPA) |                                             |         |                                         |         |
|                                                     | Inactive                              | reference                                   |         | reference                               |         |
|                                                     | Insufficiently Active                 | 1.73 (1.05 to 2.90)                         | 0.03    | 1.46 (0.86 to 2.49)                     | 0.16    |
|                                                     | Sufficiently Active                   | 3.30 (2.54 to 5.32)                         | <.001   | 2.90 (1.84 to 4.58)                     | <.001   |
|                                                     | P for trend                           |                                             | <.001   |                                         | <.001   |
| Model 2:                                            | Outdoor physical activity             |                                             |         |                                         |         |
|                                                     | Inactive                              | reference                                   |         | reference                               |         |
|                                                     | Insufficiently Active                 | 2.23 (1.38 to 3.61)                         | 0.002   | 1.81 (1.11 to 2.96)                     | 0.02    |
|                                                     | Sufficiently Active                   | 2.56 (1.45 to 4.52)                         | 0.002   | 2.11 (1.16 to 3.80)                     | 0.01    |
|                                                     | P for trend                           |                                             | 0.001   |                                         | 0.009   |
|                                                     | Indoor physical activity              |                                             |         |                                         |         |
|                                                     | Inactive                              | reference                                   |         | reference                               |         |
|                                                     | Insufficiently Active                 | 1.85 (0.98 to 3.46)                         | 0.06    | 1.40 (0.71 to 2.77)                     | 0.32    |
|                                                     | Sufficiently Active                   | 1.98 (1.17 to 3.35)                         | 0.01    | 1.47 (0.84 to 2.56)                     | 0.17    |
|                                                     | P for trend                           |                                             | 0.006   |                                         | 0.14    |
| 2007-2010*                                          |                                       | Circulating 25-OHD $\geq$ 50 nmol/L (n=531) |         |                                         |         |
| Reference<br>Circulating 25-OHD <50 nmol/L (n=206)  |                                       | Unadjusted logistic regressions             |         | Adjusted multiple logistic regressions† |         |
|                                                     |                                       | Odds ratio (95% CI)                         | P-value | Odds ratio (95% CI)                     | P-value |
| Model 3:                                            | Leisure time physical activity (LTPA) |                                             |         |                                         |         |
|                                                     | Inactive                              | reference                                   |         | reference                               |         |
|                                                     | Insufficiently Active                 | 1.84 (0.89 to 3.81)                         | 0.1     | 1.92 (0.90 to 4.11)                     | 0.09    |
|                                                     | Sufficiently Active                   | 2.76 (1.30 to 5.87)                         | 0.01    | 2.26 (1.07 to 4.77)                     | 0.03    |
|                                                     |                                       |                                             | 0.008   |                                         | 0.03    |

\*Leisure-time physical activity (LTPA) data analyzed separately due to the changes in self-reported LTPA measures from wave 2005 - 2006 to 2007-2008.

†Adjusted for age, sex, race, body mass index, and smoking status.

For peer review only

1  
2  
3  
4  
5  
6  
7  
8  
9  
10  
11  
12  
13  
14  
15  
16  
17  
18  
19  
20  
21  
22  
23  
24  
25  
26  
27  
28  
29  
30  
31  
32  
33  
34  
35  
36  
37  
38  
39  
40  
41  
42  
43  
44  
45  
46  
47  
48  
49

## STROBE Statement—checklist of items that should be included in reports of observational studies

|                              | Item No | Recommendation                                                                                                                                                                                                                                                                                                                                                                                                                                                                                                                                                                                                                                                                                            |
|------------------------------|---------|-----------------------------------------------------------------------------------------------------------------------------------------------------------------------------------------------------------------------------------------------------------------------------------------------------------------------------------------------------------------------------------------------------------------------------------------------------------------------------------------------------------------------------------------------------------------------------------------------------------------------------------------------------------------------------------------------------------|
| <b>Title and abstract</b>    | 1       | (a) Indicate the study's design with a commonly used term in the title or the abstract (Page 1)<br>(b) Provide in the abstract an informative and balanced summary of what was done and what was found (Page 2)                                                                                                                                                                                                                                                                                                                                                                                                                                                                                           |
| <b>Introduction</b>          |         |                                                                                                                                                                                                                                                                                                                                                                                                                                                                                                                                                                                                                                                                                                           |
| Background/rationale         | 2       | Explain the scientific background and rationale for the investigation being reported (page 4)                                                                                                                                                                                                                                                                                                                                                                                                                                                                                                                                                                                                             |
| Objectives                   | 3       | State specific objectives, including any prespecified hypotheses (Page 5)                                                                                                                                                                                                                                                                                                                                                                                                                                                                                                                                                                                                                                 |
| <b>Methods</b>               |         |                                                                                                                                                                                                                                                                                                                                                                                                                                                                                                                                                                                                                                                                                                           |
| Study design                 | 4       | Present key elements of study design early in the paper (Page 6)                                                                                                                                                                                                                                                                                                                                                                                                                                                                                                                                                                                                                                          |
| Setting                      | 5       | Describe the setting, locations, and relevant dates, including periods of recruitment, exposure, follow-up, and data collection (Page 6)                                                                                                                                                                                                                                                                                                                                                                                                                                                                                                                                                                  |
| Participants                 | 6       | (a) <i>Cohort study</i> —Give the eligibility criteria, and the sources and methods of selection of participants. Describe methods of follow-up<br><i>Case-control study</i> —Give the eligibility criteria, and the sources and methods of case ascertainment and control selection. Give the rationale for the choice of cases and controls<br><i>Cross-sectional study</i> —Give the eligibility criteria, and the sources and methods of selection of participants (Page 6)<br>(b) <i>Cohort study</i> —For matched studies, give matching criteria and number of exposed and unexposed<br><i>Case-control study</i> —For matched studies, give matching criteria and the number of controls per case |
| Variables                    | 7       | Clearly define all outcomes, exposures, predictors, potential confounders, and effect modifiers. Give diagnostic criteria, if applicable (Page 7-10)                                                                                                                                                                                                                                                                                                                                                                                                                                                                                                                                                      |
| Data sources/<br>measurement | 8*      | For each variable of interest, give sources of data and details of methods of assessment (measurement). Describe comparability of assessment methods if there is more than one group (Page 7-10)                                                                                                                                                                                                                                                                                                                                                                                                                                                                                                          |
| Bias                         | 9       | Describe any efforts to address potential sources of bias                                                                                                                                                                                                                                                                                                                                                                                                                                                                                                                                                                                                                                                 |
| Study size                   | 10      | Explain how the study size was arrived at (Page 6)                                                                                                                                                                                                                                                                                                                                                                                                                                                                                                                                                                                                                                                        |
| Quantitative variables       | 11      | Explain how quantitative variables were handled in the analyses. If applicable, describe which groupings were chosen and why (Page 7-10)                                                                                                                                                                                                                                                                                                                                                                                                                                                                                                                                                                  |
| Statistical methods          | 12      | (a) Describe all statistical methods, including those used to control for confounding (Page 11-12)<br>(b) Describe any methods used to examine subgroups and interactions (Page 11)<br>(c) Explain how missing data were addressed<br>(d) <i>Cohort study</i> —If applicable, explain how loss to follow-up was addressed<br><i>Case-control study</i> —If applicable, explain how matching of cases and controls was addressed<br><i>Cross-sectional study</i> —If applicable, describe analytical methods taking account of sampling strategy (Page 11)<br>(e) Describe any sensitivity analyses                                                                                                        |

Continued on next page

**Results**

|                  |     |                                                                                                                                                                                                                                                                                                                                                                                                                                        |
|------------------|-----|----------------------------------------------------------------------------------------------------------------------------------------------------------------------------------------------------------------------------------------------------------------------------------------------------------------------------------------------------------------------------------------------------------------------------------------|
| Participants     | 13* | (a) Report numbers of individuals at each stage of study—eg numbers potentially eligible, examined for eligibility, confirmed eligible, included in the study, completing follow-up, and analysed (Page 13)<br>(b) Give reasons for non-participation at each stage<br>(c) Consider use of a flow diagram                                                                                                                              |
| Descriptive data | 14* | (a) Give characteristics of study participants (eg demographic, clinical, social) and information on exposures and potential confounders (Page 13)<br>(b) Indicate number of participants with missing data for each variable of interest<br>(c) <i>Cohort study</i> —Summarise follow-up time (eg, average and total amount)                                                                                                          |
| Outcome data     | 15* | <i>Cohort study</i> —Report numbers of outcome events or summary measures over time<br><i>Case-control study</i> —Report numbers in each exposure category, or summary measures of exposure<br><i>Cross-sectional study</i> —Report numbers of outcome events or summary measures (Page 13)                                                                                                                                            |
| Main results     | 16  | (a) Give unadjusted estimates and, if applicable, confounder-adjusted estimates and their precision (eg, 95% confidence interval). Make clear which confounders were adjusted for and why they were included (Page 13-14)<br>(b) Report category boundaries when continuous variables were categorized (Page 7-10)<br>(c) If relevant, consider translating estimates of relative risk into absolute risk for a meaningful time period |
| Other analyses   | 17  | Report other analyses done—eg analyses of subgroups and interactions, and sensitivity analyses (Page 14)                                                                                                                                                                                                                                                                                                                               |

**Discussion**

|                  |    |                                                                                                                                                                                         |
|------------------|----|-----------------------------------------------------------------------------------------------------------------------------------------------------------------------------------------|
| Key results      | 18 | Summarise key results with reference to study objectives (Page 15)                                                                                                                      |
| Limitations      | 19 | Discuss limitations of the study, taking into account sources of potential bias or imprecision. Discuss both direction and magnitude of any potential bias (Page 17)                    |
| Interpretation   | 20 | Give a cautious overall interpretation of results considering objectives, limitations, multiplicity of analyses, results from similar studies, and other relevant evidence (Page 15-16) |
| Generalisability | 21 | Discuss the generalisability (external validity) of the study results (Page 17)                                                                                                         |

**Other information**

|         |    |                                                                                                                                                                         |
|---------|----|-------------------------------------------------------------------------------------------------------------------------------------------------------------------------|
| Funding | 22 | Give the source of funding and the role of the funders for the present study and, if applicable, for the original study on which the present article is based (Page 20) |
|---------|----|-------------------------------------------------------------------------------------------------------------------------------------------------------------------------|

\*Give information separately for cases and controls in case-control studies and, if applicable, for exposed and unexposed groups in cohort and cross-sectional studies.

**Note:** An Explanation and Elaboration article discusses each checklist item and gives methodological background and published examples of transparent reporting. The STROBE checklist is best used in conjunction with this article (freely available on the Web sites of PLoS Medicine at <http://www.plosmedicine.org/>, Annals of Internal Medicine at <http://www.annals.org/>, and Epidemiology at <http://www.epidem.com/>). Information on the STROBE Initiative is available at [www.strobe-statement.org](http://www.strobe-statement.org).

# BMJ Open

## Leisure-time physical activity and circulating 25-hydroxyvitamin D levels in cancer survivors, a cross-sectional analysis using data from the National Health and Nutrition Examination Survey

|                                 |                                                                                                                                                                                                                 |
|---------------------------------|-----------------------------------------------------------------------------------------------------------------------------------------------------------------------------------------------------------------|
| Journal:                        | <i>BMJ Open</i>                                                                                                                                                                                                 |
| Manuscript ID                   | bmjopen-2017-016064.R1                                                                                                                                                                                          |
| Article Type:                   | Research                                                                                                                                                                                                        |
| Date Submitted by the Author:   | 17-Mar-2017                                                                                                                                                                                                     |
| Complete List of Authors:       | Yang, Lin; Medizinische Universitat Wien, Epidemiology; Washington University in Saint Louis School of Medicine, Surgery<br>Toriola, Adetunji; Washington University in Saint Louis School of Medicine, Surgery |
| <b>Primary Subject Heading</b>: | Epidemiology                                                                                                                                                                                                    |
| Secondary Subject Heading:      | Oncology                                                                                                                                                                                                        |
| Keywords:                       | Cancer survivor, cancer prognosis, vitamin D, physical activity, NHANES                                                                                                                                         |
|                                 |                                                                                                                                                                                                                 |

SCHOLARONE™  
Manuscripts



1  
2  
3 **Title: Leisure-time physical activity and circulating 25-hydroxyvitamin D levels in**  
4 **cancer survivors, a cross-sectional analysis using data from the National Health**  
5 **and Nutrition Examination Survey**  
6  
7  
8  
9

10  
11  
12 Lin Yang PhD<sup>1,2</sup>, Adetunji T. Toriola MD, PhD<sup>1</sup>  
13  
14

15  
16  
17 1. The Division of Public Health Sciences, Department of Surgery, Washington  
18 University School of Medicine and Siteman Cancer Center, St Louis, Missouri, USA  
19  
20

21  
22  
23 2. Department of Epidemiology, Medical University of Vienna, Vienna, Austria  
24  
25  
26

27  
28  
29 Correspondence to:

30  
31 Adetunji T. Toriola

32  
33 The Division of Public Health Sciences, Department of Surgery,

34  
35 660 S. Euclid Avenue, Campus Box 8100

36  
37 St. Louis, MO 63110, USA

38  
39 Telephone: (314) 268-2668

40  
41 Email: [toriolaa@wudosis.wustl.edu](mailto:toriolaa@wudosis.wustl.edu)  
42  
43  
44  
45  
46  
47  
48

49 Keywords: cancer survivor, cancer prognosis, vitamin D, physical activity, NHANES  
50  
51

52 Abstract: 295 words  
53  
54

55 Text: 3,875 words  
56  
57  
58  
59  
60

## Abstract

**Objectives:** Circulating 25-hydroxyvitamin D (25-OHD) is associated with improved cancer prognosis in some studies, yet it may be a surrogate marker for physical activity. Using data from the National Health and Nutrition Examination Survey (NHANES), we investigated the associations of leisure-time physical activity (LTPA) with circulating 25-OHD levels in cancer survivors, and determined whether associations differ by indoor and outdoor activity.

**Design:** Cross-sectional study.

**Setting:** The US National Health and Nutrition Examination Survey (NHANES).

**Participants:** Cancer survivors with available data on demographic information, measures of adiposity, smoking history, self-reported LTPA, circulating 25-OHD levels in five waves of NHANES (2001-2010).

**Main outcomes measures:** Circulating 25-OHD levels.

**Results:** Multivariable linear regression and logistic regression models were used to evaluate the associations of self-reported LTPA with 25-OHD, adjusting for potential confounders. Due to the differences in LTPA measure, the analyses were conducted separately for 2001-2006, and 2007-2010 data. We further estimated associations by indoor and outdoor activity in the 2001-2006 data. There were 1,530 cancer survivors (mean age=60.5 years, mean BMI=28.6 kg/m<sup>2</sup>). The prevalent cancer sites were breast (19.3%), prostate (18.8%), cervix (10.4%), and colon (8.6%). Compared to inactive cancer survivors, being physically active was associated with higher circulating 25-OHD levels (8.07 nmol/L, 95%CI: 4.63 to 11.52) for 2001-2006 data. In the mutually adjusted model, higher outdoor activity (5.83 nmol/L, 95%CI: 1.64 to 10.01), but not indoor

1  
2  
3 activity (2.93 nmol/L, 95%CI: -1.80 to 7.66), was associated with statistically significant  
4  
5 higher 25-OHD levels. The interaction between indoor and outdoor activities was,  
6  
7 however, not significant (P-value=0.29).  
8  
9

10 **Conclusion:** Physical activity, particularly outdoor activity is associated with higher 25-  
11  
12 OHD levels in cancer survivors. In view of the possible beneficial effects of vitamin D on  
13  
14 cancer prognosis, engaging in outdoor physical activity could provide clinically  
15  
16 meaningful increases in 25-OHD levels among cancer survivors.  
17  
18  
19  
20  
21  
22  
23

#### 24 **Strengths and limitations of this study**

- 25  
26  
27 • To the best of our knowledge, this is the first study to investigate the association  
28  
29 of leisure-time physical activity (LTPA) with circulating 25-hydroxyvitamin D (25-  
30  
31 OHD) levels in cancer survivors. We further compared associations by outdoor  
32  
33 and indoor LTPA.  
34  
35
- 36  
37 • The current study pooled data from cancer survivors in a nationally  
38  
39 representative adult sample in the US.  
40  
41
- 42  
43 • This study controlled for a range of factors that are known to affect circulating 25-  
44  
45 OHD levels.  
46  
47
- 48  
49 • Study limitations includes (1), the cross-sectional nature makes it impossible to  
50  
51 determine a causal effect; (2) season, an important determinant of 25-OHD  
52  
53 levels, was categorized into 2 (winter and summer, rather than winter, summer,  
54  
55 fall and spring); (3) physical activity was self-reported.  
56  
57  
58  
59  
60

## Background

There are >15.5 million cancer survivors in the US and the number is expected to rise to 20 million by 2026.<sup>1</sup> Identifying factors, particularly modifiable factors, that improve prognosis and survival in this rapidly expanding demographic group is, therefore, a high priority.

There is emerging evidence that vitamin D status is associated with improved cancer prognosis and survival, particularly colorectal and breast cancers.<sup>2-5</sup> Circulating 25-hydroxyvitamin D (25-OHD) is the best indicator of overall vitamin D status because it has a long half-life, is unregulated by homeostatic systems in the body, and reflects total vitamin D from multiple determinants.<sup>6-9</sup> However, it has been suggested that circulating 25-OHD level may be a surrogate or biological marker for lifestyle factors that impact cancer prognosis, notably physical activity.<sup>2 10 11</sup> Physical activity, before and after cancer diagnosis, is associated with reduced mortality in cancer survivors,<sup>12-14</sup> although the underlying mechanisms are still being elucidated. In cancer-free population, leisure-time physical activity is associated with an increase in circulating 25-OHD levels; which is thought to reflect exposure to sunlight, a major determinant of circulating 25-OHD levels.<sup>15</sup> In support, studies have reported higher 25-OHD levels for the same amount of outdoor, compared to indoor physical activity,<sup>16</sup> although others have not.<sup>17</sup> Nevertheless, it has also been shown that physical activity and sun exposure may have independent effects on circulating 25-OHD levels, suggesting that indoor physical activity might be sufficient to increase circulating 25-OHD levels through its effect on 25-OHD metabolism, such as 1,25-dihydroxyvitamin.<sup>18-21</sup>

1  
2  
3  
4  
5  
6 To the best of our knowledge, no study has investigated the associations of physical  
7  
8 activity with circulating 25-OHD levels in cancer survivors. Because physical activity  
9  
10 declines after cancer diagnosis, findings in cancer-free population may not apply to  
11  
12 cancer survivors. Using data from the National Health and Nutrition Examination Survey  
13  
14 (NHANES), our objectives are to (i) investigate the associations of leisure-time physical  
15  
16 activity with circulating 25-OHD levels in cancer survivors, (ii) determine whether  
17  
18 associations differ by indoor and outdoor physical activity. Study findings could have  
19  
20 implications for public health recommendations in cancer survivors because physical  
21  
22 inactivity and vitamin D insufficiency are prevalent among cancer survivors.<sup>22 23</sup>  
23  
24  
25  
26  
27  
28  
29  
30  
31  
32  
33  
34  
35  
36  
37  
38  
39  
40  
41  
42  
43  
44  
45  
46  
47  
48  
49  
50  
51  
52  
53  
54  
55  
56  
57  
58  
59  
60

## Methods

### Study Population

The National Health and Nutrition Examination Survey (NHANES) was designed to provide cross-sectional estimates on the prevalence of health, nutrition, and potential risk factors among the civilian non-institutionalized U.S. population up to 85 years of age.<sup>24</sup> In brief, NHANES surveys a nationally representative complex, stratified, multistage, probability clustered sample of about 5,000 participants each year in 15 counties across the country. The NHANES obtained approval from the National Center for Health Statistics Research Ethics Review Board and participants provided written consent.

We extracted demographic information, measures of adiposity, smoking history, self-reported leisure time physical activity, circulating 25-OHD levels, cancer diagnosis, and combined them into a single dataset for each data collection wave. Participants were considered as cancer survivors if they answered “yes” to the question “Have you ever been told by a doctor or other health professional that you had cancer or a malignancy of any kind?” We excluded participants who had non-melanoma skin cancer. This interview question was only given to males and females 20 years or older, subsequently restricted the analysed sample to adult cancer survivors. We created a single dataset for each wave of data from NHANES in 2001 to 2002, 2003 to 2004, 2005 to 2006, 2007 to 2008, and 2009 to 2010, and excluded those who were never diagnosed with cancer, or were pregnant. (Figures 1 and 2)

### Circulating 25-OHD levels

The process of blood collection is detailed in the NHANES Laboratory/Medical Technologist Procedures Manual.<sup>25</sup> Participants who received chemotherapy within last 4 weeks were excluded from blood collection in the NHANES study. Blood samples were collected, processed, stored and shipped to University of Washington, Seattle for testing. The lab method measuring 25-OHD for 2007-2010 changed from 2005-2006 and earlier in NHANES, and has been described previously.<sup>26</sup> Briefly, circulating 25-OHD concentrations were measured at the National Center for Environmental health, CDC, Atlanta, GA using the DiaSorin RIA kit (Stillwater, MN) between 2001 and 2006. We converted the 25-OHD data in 2001-2006 using provided regression to equivalent 25-OHD measurement from a standardized liquid chromatography-tandem mass spectrometry (LC-MS/MS) method, which was used in the analysis of 25-OHD in NHANES 2007-2010 data. This standardization procedure therefore ensures that 25-OHD data is comparable between 2001-2006 and 2007-2010.

### Socio-demographic characteristics

Socio-demographic characteristics including age, sex, race and ethnicity, and smoking status were extracted. Based on self-reported race and ethnicity, participants were classified into one of the three racial groups: Non-Hispanic White, Non-Hispanic Black, and Hispanic and others. We classified participants into three groups: never smokers (did not smoke 100 cigarettes and do not smoke now), former smokers (smoked 100 cigarettes in life and do not smoke now), and current smokers (smoked 100 cigarettes in life and smoke now).

### Body mass index (BMI)

Weight and height were measured at the time of physical examination in a mobile examination centre or in the participant's home. The measurements followed standard procedures and were carried out by trained technicians using standardized equipment. BMI was calculated as weight in kg/(height in meters)<sup>2</sup>. We categorized study participants into standard BMI categories: underweight (<18.5kg/m<sup>2</sup>), normal weight (18.5-24.9 kg/m<sup>2</sup>), overweight (25.0 – 29.9 kg/m<sup>2</sup>), and obese (≥30.0 kg/m<sup>2</sup>). For analytic purposes, we combined those who were underweight and those who had normal weight into 1 category (≤25 kg/m<sup>2</sup>).

### Season of blood draw

Blood samples were collected at the time of physical examination in a mobile examination center (MEC) or in the participants' home. Season of blood draw was determined from the documented month of physical examination. Months were reported in two groups: November 1<sup>st</sup> through April 30<sup>th</sup>, or May 1<sup>st</sup> through October 31<sup>st</sup>, and classified into winter or summer, respectively.<sup>16</sup>

### Dietary Vitamin D supplement use

Information on dietary vitamin D supplement was retrieved from the 30-day Dietary Supplement dataset in the 2001-2006 and 2007-2010 data. In the 2001-2006 dataset, we obtained data on individual product for participants who reported taking vitamin supplement, and linked to the Dietary Supplements Ingredient Database.<sup>27</sup> Products'



1  
2  
3 ingredient that contained Vitamin D were aggregated for each participant, and then  
4  
5 categorized into a binary variable (yes/no) for dietary vitamin D supplement use  
6  
7  
8 assessment. In 2007-2010 data, participants' total dietary supplement use data was  
9  
10 available, thus, was used to determine their dietary vitamin D supplement use (yes/no).  
11  
12  
13

#### 14 15 Self-reported leisure-time physical activity (LTPA) 16

17 The assessment on self-reported physical activity for 2007-2010 changed from 2005-  
18  
19 2006 and earlier. There is no conversion provided between two assessments, therefore  
20  
21 analyses for LTPA were conducted separately for the 2001 – 2006, and 2007 – 2010  
22  
23 data.  
24  
25  
26  
27  
28

29 In the 2001-2006 data, participants self-reported specific LTPA in the past 30 days from  
30  
31 a list of 48 activities, that if they engaged in certain activities, and the frequencies and  
32  
33 durations of these activities. Each activity was coded into a metabolic equivalent task  
34  
35 (MET) score based on the 2011 Compendium of Physical Activities, a valid and globally  
36  
37 used instrument to quantify the energy expenditure of physical activity in adults.<sup>28</sup> For  
38  
39 each reported activity, MET-minutes per week (MET-min/week) were calculated by  
40  
41 multiplying the MET value of each reported activity by the minutes spent in the activity  
42  
43 per seven days. Overall LTPA was summarized as the total MET-minutes per week of  
44  
45 all reported activities.<sup>29</sup> Cancer survivors were classified as inactive (zero MET-  
46  
47 min/week), insufficiently active (<750 MET-min/week), and sufficiently active ( $\geq 750$   
48  
49 MET-min/week) based on the standard definition.<sup>29</sup> In addition, we categorized each of  
50  
51 the 48 listed activities into outdoor (e.g., walking, jogging, fishing) or indoor (e.g.,  
52  
53  
54  
55  
56  
57  
58  
59  
60

1  
2  
3 aerobics, bowling, weights) activity. Activities that could be either indoor or outdoor  
4  
5 (e.g., bicycling, swimming) were classified as indoor to ensure a conservative estimation  
6  
7 of the associations between outdoor LTPA and 25-OHD. Both indoor and outdoor LTPA  
8  
9 were summarized in MET-min/week, then classified as inactive (zero MET-min/week),  
10  
11 insufficiently active (<450 MET-min/week), and sufficiently active ( $\geq$ 450 MET-min/week).  
12  
13 We used 450 MET-min/week as the cut-off given is the minimal goal of weekly LTPA.<sup>29</sup>  
14  
15  
16  
17  
18  
19

20 In the 2007-2010 data, participants self-reported their daily activities, leisure time  
21  
22 activities, and sedentary activities, using questions based on the Global Physical  
23  
24 Activity Questionnaire (GPAQ).<sup>30</sup> Levels of LTPA were calculated as the minutes per  
25  
26 week that participants reported participating in moderate-to-vigorous-intensity physical  
27  
28 activity (MVPA). Participants reported the number of days and minutes spent in  
29  
30 moderate recreational and vigorous recreational activities in a typical week, by  
31  
32 answering questions “In a typical week, on how many days do you do vigorous-intensity  
33  
34 sports, fitness or recreational activities?”, “Minutes vigorous recreational activities”, “In a  
35  
36 typical week, on how many days do you do moderate-intensity sports, fitness or  
37  
38 recreational activities?”, and “Minutes moderate recreational activities”. We summarized  
39  
40 the total number of minutes for both activities, where the number of minutes spent in  
41  
42 vigorous-intensity physical activity were doubled and added to the number of minutes of  
43  
44 moderate-intensity physical activity to approximately equivalent the MET value.<sup>31</sup>  
45  
46  
47  
48  
49

50 Cancer survivors were classified as inactive (zero min/week MVPA), insufficiently active  
51  
52 (<150 min/week MVPA), and sufficiently active ( $\geq$ 150 min/week MVPA) based on the  
53  
54 physical activity guidelines for cancer survivors.<sup>32</sup>  
55  
56  
57  
58  
59  
60

## Statistical Analysis

Survey analysis procedures were used to account for the sample weights (MEC exam weight), stratification, and clustering of the complex sampling design to ensure nationally representative estimates. Information on socio-demographic characteristics, weight, height, season of blood draw, and self-reported LTPA was complete among cancer survivors who had available data on circulating 25-OHD levels. We calculated the descriptive statistics for participants' characteristics and LTPA categories by 25-OHD levels in quintiles separately in 2001-2006 data, and 2007-2010 data. We summarized weighted means and standard errors for continuous variables, and weighted proportions for categorical variables.

We estimated linear associations between LTPA and 25-OHD levels in both 2001-2006 and 2007-2010 data. The multivariable linear regression models for LTPA were adjusted for age, sex, race, BMI, smoking status, and season of blood draw. In the 2001-2006 data, we further estimated the linear associations between LTPA and 25-OHD separately by indoor and outdoor activities. Chi-square test indicated significant difference ( $P$ -value $<0.001$ ) between indoor and outdoor activities. In the multivariable linear regression models, we simultaneously adjusted for both activities. We tested for differences between the indoor and outdoor effects by including both in the regression model and testing for interaction. We examined the normality of residuals by kernel density estimate and standardized normal probability plots for all the linear regression models. Continuous 25-OHD data was categorized as low ( $<50$  nmol/L) and high ( $\geq 50$  nmol/L) 25-OHD based on definitions of vitamin D insufficiency.<sup>30</sup>

1  
2  
3  
4  
5  
6 To calculate the prevalence ratios (PRs) of high 25-OHD level ( $\geq 50$  nmol/L) across  
7  
8 LTPA categories, we first calculated prevalence odds ratios (PORs) for each category in  
9  
10 multivariable logistic regression models. Since the PORs do not approximate the PRs  
11  
12 for common outcome (25-OHD  $\geq 50$  nmol/L), we used the baseline prevalence to correct  
13  
14 the PORs and 95% confidence intervals based on existing method to obtain reliable  
15  
16 PRs estimates.<sup>33</sup> We further conducted following sensitivity analyses: 1) using BMI as a  
17  
18 continuous variable in the regression models; 2) stratification by BMI category; 3)  
19  
20 classifying activities that could be either indoor or outdoor (e.g., bicycling, swimming) as  
21  
22 outdoor activities; 4) classifying activities that could be either indoor or outdoor (e.g.,  
23  
24 bicycling, swimming) as half-half (MET-min/week) to indoor and outdoor activities.  
25  
26 All statistical significance was set at  $p < 0.05$ . All statistical analyses were performed  
27  
28 using Stata version 14.0 (STATA Corp., College Station, Texas, USA).  
29  
30  
31  
32  
33  
34  
35  
36  
37  
38  
39  
40  
41  
42  
43  
44  
45  
46  
47  
48  
49  
50  
51  
52  
53  
54  
55  
56  
57  
58  
59  
60

## Results

Our study population consisted of 1,530 cancer survivors who had data on circulating 25-OHD levels. The most prevalent cancer sites were breast cancer (19.3%), prostate (18.8%), cervix (10.4%), and colon (8.6%). Participants' mean age at the time of baseline examination was 60.5 years, and their mean BMI was 28.6 kg/m<sup>2</sup>. Circulating 25-OHD levels were significantly higher among those who reported dietary vitamin D supplement use than those who did not in both 2001-2006 (68.82 vs 56.74 nmol/L,  $p < .001$ ) and 2007-2010 data (83.73 vs 60.88 nmol/L,  $p < .001$ ). We observed statistically significant differences in circulating 25-OHD levels for most characteristics, except for age, and sex (Tables 1 (2001-2006) and 2 (2007-2010)). Cancer survivors who were obese, Non-Hispanic Black, or smokers had lower 25-OHD levels than those who had normal weight, Non-Hispanic White/Hispanic and were non-smokers, respectively.

[Insert Table 1 and Table 2]

### Associations between LTPA and Circulating 25-OHD levels

Tables 3 and 4 summarize both the non-adjusted and adjusted associations between LTPA and circulating 25-OHD in linear regression and logistic regression models, respectively. Because LTPA measure differed between 2001-2006 and 2007-2010 and there is no conversion between the two, it is not possible to compare the findings between two study phrases directly. Cancer survivors who were sufficiently active had higher circulating 25-OHD levels than those who were inactive in univariate analyses, and these findings were maintained in multivariable analyses in the 2001-2006, but not the 2007-2010 data. This translated to 8.07 nmol/L (95% CI: 4.63 to 11.52) higher 25-

1  
2  
3 OHD levels in 2001-2006 phase in the multivariable-adjusted models. Furthermore, the  
4 comprehensive data on a list of 48 activities collected in 2001-2006 allowed us to  
5  
6 extend the analyses to compare between indoor and outdoor LTPA in relation to 25-  
7  
8 OHD levels. In the non-adjusted models (Table 3), higher levels of indoor and outdoor  
9  
10 LTPA both were associated with higher 25-OHD levels. However, in multivariable-  
11  
12 adjusted models (that also mutually adjusted for indoor and outdoor LTPA), the  
13  
14 association was only statistically significant among cancer survivors who engaged in  
15  
16 outdoor LTPA (5.83 nmol/L, 95% CI: 1.64 to 10.01). The interaction between indoor and  
17  
18 outdoor activities was not significant (P-value=0.29). Analyses using logistic regression  
19  
20 models were supportive. Our findings were similar when we classified activities that  
21  
22 could be either indoor or outdoor (e.g., bicycling, swimming) as outdoor activities (6.39  
23  
24 nmol/L, 95% CI: 2.85-9.94), and classifying these activities as half-half (MET-in/week) to  
25  
26 indoor and outdoor activities (7.26 nmol/L, 95% CI: 2.88-11.64) (Data not shown).  
27  
28  
29  
30  
31  
32  
33  
34  
35

36 Likewise, we observed similar results in sensitivity analyses using BMI as a continuous  
37  
38 variable; higher 25-OHD levels were associated with LTPA in the overall analyses (7.74  
39  
40 nmol/L, 95% CI: 4.53-10.95), and among those who engaged in outdoor LTPA (5.82  
41  
42 nmol/L, 95% CI: 1.69-9.95) (Data not shown). In stratified analyses, associations of  
43  
44 LTPA with higher circulating 25-OHD levels was retained in the obese group in the  
45  
46 2001-2006 data (7.10 nmol/L, 95% CI: 2.51 to 11.70, outdoor LTPA) as well as 2007-  
47  
48 2010 data (13.91 nmol/L, 95% CI: 3.86-23.96, overall LTPA) (Data not shown). Outdoor  
49  
50 LTPA was lower in Non-Hispanic Black (69.2% inactive vs. 51.5% inactive among Non-  
51  
52 Hispanic Whites, and 43.2% inactive among Hispanics) (Data not shown).  
53  
54  
55  
56  
57  
58  
59  
60

1  
2  
3  
4  
5  
6  
7  
8  
9  
10  
11  
12  
13  
14  
15  
16  
17  
18  
19  
20  
21  
22  
23  
24  
25  
26  
27  
28  
29  
30  
31  
32  
33  
34  
35  
36  
37  
38  
39  
40  
41  
42  
43  
44  
45  
46  
47  
48  
49  
50  
51  
52  
53  
54  
55  
56  
57  
58  
59  
60

[Insert Table 3 and Table 4]

For peer review only

## Discussion

We observed that being physically active was associated with higher circulating 25-OHD levels in a nationally representative sample of cancer survivors. Further analyses showed that the elevated 25-OHD levels were only statistically significant among cancer survivors who engaged in outdoor physical activity.

To the best of our knowledge, this is the first study to evaluate the associations of physical activity with circulating 25-OHD levels in cancer survivors. Our findings are, however, similar to what has been reported among non-cancer participants enrolled in NHANES (1988-1994).<sup>16</sup> Scragg and Camargo reported a 9.6 nmol/L increase in 25-OHD levels among participants who engaged in outdoor LTPA compared to those who did not engage in outdoor LTPA. The increase in 25-OHD levels associated with outdoor LTPA is higher than what we observed in our study population (5.83 nmol/L higher 25-OHD). This could be due to the different ways LTPA was categorized. The most active group in their study translates to participating daily in outdoor activity, whilst only 5.6% (weighted proportion) of cancer survivors in our sample achieved this physical activity level. To compare at an equivalently active level, our findings of a 5.83 nmol/L increase in cancer survivors is similar to 6.1 nmol/L higher 25-OHD level in individuals who were at a similar activity level (engaged in 13-30 times outdoor LTPA per month) reported by Scragg and Camargo.<sup>16</sup> Data from trials have shown that each 40 IU of vitamin D consumed increases serum 25-OHD concentrations by 0.53 nmol/L in adults.<sup>34</sup> The recommended dietary vitamin D allowance for adults in the US is 600 IU, which is expected to increase circulating 25-OHD levels by 15 nmol/L. Thus, our findings (a 5.83 nmol/L increase) suggests that engaging in outdoor LTPA could provide



1  
2  
3 clinically meaningful increases in 25-OHD levels among cancer survivors. A more  
4 recent analysis using NHANES 2003-2006 data reported increasing level of 25-OHD  
5 associated with higher level of objectively measured moderate-to-vigorous physical  
6 activity, but the association was not stronger for outdoor LTPA compared to indoor  
7 when using self-reported data.<sup>17</sup>  
8  
9  
10  
11  
12  
13  
14  
15  
16

17 It is unclear whether physical activity has direct or indirect effects on 25-OHD levels.  
18 Sun exposure is the major determinant of circulating 25-OHD levels, hence, it is  
19 possible that physical activity may indirectly impact 25-OHD levels through increased  
20 sun exposure associated with outdoor activity<sup>7</sup> among active individuals; yet few studies  
21 have measured activities specifically to outdoor, or able to adjusted for sun exposure.<sup>16</sup>  
22  
23  
24  
25  
26  
27  
28  
29  
30  
31  
32  
33  
34  
35  
36  
37  
38  
39  
40  
41  
42  
43  
44  
45  
46  
47  
48  
49  
50  
51  
52  
53  
54  
55  
56  
57  
58  
59  
60

<sup>17 35 36</sup> On the other hand, physical activity may directly impact 25-OHD metabolism.  
Zittermann and colleagues<sup>18</sup> reported higher calcium absorption rates and plasma  
calcritrol levels in exercise-trained young men compared to age-matched sedentary  
controls. Similarly, in a small study, young males who underwent muscle-building  
exercise (indoor) for at least 1 year had higher circulating 25-OHD, Gla-protein, and  
1,25-dihydroxyvitamin levels compared to age-matched controls who received constant  
daily diet same as the exercise group.<sup>20</sup> However, whether this mechanism operates in  
cancer survivors is unclear, because of the physiological, biological and behavioral  
alterations associated with cancer, and cancer treatment.<sup>32</sup>

We observed statistically significant higher circulating 25-OHD levels associated with  
outdoor, but not with indoor, LTPA in the mutually adjusted model. Nevertheless, no

1  
2  
3 statistically significant interaction between indoor and outdoor LTPA was observed. It is  
4 likely that LTPA influence 25-OHD via multiple pathways, possibly both an indirect effect  
5 due to sun exposure and a direct impact on 25-OHD metabolism. However this warrants  
6 further investigation using precise measures of physical activity<sup>37</sup> and taking into  
7 consideration sun exposure, and other vitamin D metabolites.  
8  
9

10  
11 We observed that obese cancer survivors who were active had higher circulating 25-  
12 OHD levels. Obesity is believed to induce low circulating 25-OHD levels through  
13 volumetric dilution of vitamin D in the excessive adipose tissue.<sup>38</sup> Given that obese  
14 cancer survivors are at higher risk of vitamin D deficiency compared to the non-obese,<sup>39</sup>  
15  
16  
17  
18  
19  
20  
21  
22  
23  
24  
25  
26  
27  
28  
29  
30  
31  
32  
33  
34  
35  
36  
37  
38  
39  
40  
41  
42  
43  
44  
45  
46  
47  
48  
49  
50  
51  
52  
53  
54  
55  
56  
57  
58  
59  
60  
<sup>40</sup> present findings suggested engaging in physical activity might be particularly  
important to maintain or increase circulating 25-OHD levels among obese cancer  
survivors. Future studies are needed to confirm these findings using more precise  
measures of adiposity (e.g., body fat percentage) in a larger study population.

The association between LTPA and dietary vitamin D supplement use appeared to differ  
between 2001-2006 data ( $p=0.19$ ) and 2007-2010 ( $p=0.03$ ) data, although the  
prevalence of dietary vitamin D supplement use were similar in two study phases (51.4%  
vs. 51.5%). In the 2007-2010 data, active cancer survivors are more likely to report  
dietary vitamin D supplement use compared to inactive ones. Thus, the non-significant  
findings of LTPA and circulating 25-OHD levels could arise from the change in self-  
reported LTPA measures from 2001-2006 to 2007-2010 data.

1  
2  
3 The main strength of this analysis is pooling cancer survivors from a nationally  
4 representative adult sample in the US. We aggregated five waves' data and achieved a  
5 fairly sizeable sample. In addition, we controlled for a range of factors that are known to  
6 affect the circulating 25-OHD levels. Further, we were able to compare associations of  
7 LTPA with 25-OHD by outdoor and indoor LTPA, thereby providing further insights on  
8 the associations of LTPA with 25-OHD levels.  
9  
10  
11  
12  
13  
14  
15  
16  
17  
18  
19

20 There are a number of limitations to this study. First, the cross-sectional nature of this  
21 study makes it impossible to determine a causal effect. The debate on whether vitamin  
22 D deficiency is a risk factor for mortality or an indicator of good health is ongoing.<sup>41 42</sup> It  
23 is possible that active cancer survivors were more active because of better health status,  
24 than those who were inactive. Thus, the higher 25-OHD levels in active cancer survivors  
25 might be an indicator of better overall health. Second, season, an important determinant  
26 of 25-OHD levels, was only available in two categories. Solar radiation, required for skin  
27 to synthesize vitamin D, is weaker in winter compared to summer. However, there were  
28 no statistically significant differences between winter (Southern states) and summer  
29 (Northern states) 25-OHD levels in our study population, probably owing to the timing of  
30 blood collection in each region. The NHANES study collected blood samples in the  
31 Southern states during winter, and in the Northern states during summer. Third, we  
32 were not able to conduct analyses stratified by cancer type or time since diagnosis  
33 because of the limited number of individual cancers. Finally, physical activity was self-  
34 reported. Participants who received chemotherapy within last 4 weeks were excluded  
35 from blood collection within the NHANES study. Chemotherapy associated reduction of  
36  
37  
38  
39  
40  
41  
42  
43  
44  
45  
46  
47  
48  
49  
50  
51  
52  
53  
54  
55  
56  
57  
58  
59  
60

1  
2  
3 circulating 25-OHD level has been documented previously.<sup>43-45</sup> Therefore our findings  
4  
5 might not be generalizable to patients receiving chemotherapy.  
6  
7  
8  
9

10 Our findings of an association between LTPA and 25-OHD, that was stronger for  
11 outdoor LTPA compared to indoor LTPA has implications for public health  
12 recommendations in cancer survivors. Although the casual relationship of 25-OHD with  
13 cancer survival is yet unclear, strong evidence supports the benefits of physical activity  
14 in improved cancer survival and the quality of life during survival.<sup>37 46</sup> Our findings  
15 suggest that 25-OHD might be a surrogate marker of physical activity that accounts for  
16 the direct and indirect effects of LTPA, particularly outdoor.<sup>7 16</sup> The proportion of cancer  
17 survivors in NHANES who did not engage in any LTPA was high, especially in the 2007-  
18 2010 (53.3%) compared to the 2001-2006 wave (38.3%). This observed decline in  
19 LTPA might be attributed to the differences in measures and may not reflect an actual  
20 change in LTPA levels, i.e. the 2001-2006 measure is comprised of 48 activity items  
21 whilst the 2007-2010 measure queries general physical activity participation. This  
22 differences in measures may also contribute to the non-significant findings observed in  
23 the 2007-2010 data. In fact, an increase in the physical activity level in the US  
24 population from 2001 to 2011 has been reported from the BRFSS data,<sup>47</sup> though this  
25 trend may not hold true in cancer survivors. Guidelines from the American Cancer  
26 Society<sup>32</sup> and American College of Sports Medicine<sup>48</sup> suggest that cancer survivors  
27 should follow the physical activity guidelines for Americans with specific exercise  
28 programming adaptations based on disease- and treatment-related adverse effects.  
29 However, physical activity levels in these populations are critically low during and after  
30  
31  
32  
33  
34  
35  
36  
37  
38  
39  
40  
41  
42  
43  
44  
45  
46  
47  
48  
49  
50  
51  
52  
53  
54  
55  
56  
57  
58  
59  
60

1  
2  
3 treatment.<sup>49</sup> Physical activity interventions in cancer survivors may consider including  
4  
5 early morning (before 11 am) outdoor activities for about 15 minutes. Notably, given the  
6  
7 well-documented differences in cancer prognosis between non-Hispanic Blacks and  
8  
9 other racial groups, and the emerging associations of vitamin D with cancer prognosis,  
10  
11 physical activity interventions incorporating outdoor activities might be particularly  
12  
13 important for cancer survival among non-Hispanic Blacks.  
14  
15  
16  
17  
18  
19

20 In conclusion, physical activity, particularly outdoor physical activity is associated with  
21  
22 higher 25-OHD levels in cancer survivors. This adds to the potential health benefits of  
23  
24 being physically active. Non-Hispanic Black cancer survivors, who are more likely to  
25  
26 have vitamin D deficiency, were less likely to engage in outdoor LTPA. In view of the  
27  
28 possible beneficial effects of vitamin D on cancer prognosis, engaging in outdoor  
29  
30 physical activity could provide clinically meaningful increases in 25-OHD levels among  
31  
32 cancer survivors.  
33  
34  
35  
36  
37  
38  
39  
40  
41  
42  
43  
44  
45  
46  
47  
48  
49  
50  
51  
52  
53  
54  
55  
56  
57  
58  
59  
60

1  
2  
3 **Funding:** This work was supported by the Transdisciplinary Research on Energetics and  
4 Cancer (TREC) Center at Washington University in St. Louis (LY) and the Alvin J.  
5 Siteman Cancer Center, Barnes-Jewish Hospital Foundation, and Washington  
6 University School of Medicine (ATT). The TREC Center is funded by the National  
7 Cancer Institute at NIH (U54 CA155496).  
8  
9

10  
11  
12  
13  
14  
15  
16  
17 **Competing interests:** None declared.  
18  
19

20  
21  
22 **Ethics approval:** National Center for Health Statistics Research Ethics Review Board  
23 Approval.  
24  
25  
26

27  
28  
29 **Contributors:** LY and ATT conceived and designed study, analysed and interpreted  
30 data, drafted and reviewed manuscript.  
31  
32  
33

34  
35  
36 **Data sharing statement:** The NHNAES data are publically available at  
37 <https://wwwn.cdc.gov/nchs/nhanes/Default.aspx>.  
38  
39  
40  
41  
42  
43  
44  
45  
46  
47  
48  
49  
50  
51  
52  
53  
54  
55  
56  
57  
58  
59  
60

## REFERENCES

1. Miller KD, Siegel RL, Lin CC, et al. Cancer treatment and survivorship statistics, 2016. *CA: a cancer journal for clinicians* 2016;**66**(4):271-89.
2. Toriola AT, Nguyen N, Scheitler-Ring K, et al. Circulating 25-hydroxyvitamin D levels and prognosis among cancer patients: a systematic review. *Cancer epidemiology, biomarkers & prevention : a publication of the American Association for Cancer Research, cosponsored by the American Society of Preventive Oncology* 2014;**23**(6):917-33.
3. Yao S, Kwan ML, Ergas IJ, et al. Association of Serum Level of Vitamin D at Diagnosis With Breast Cancer Survival: A Case-Cohort Analysis in the Pathways Study. *JAMA oncology* 2016.
4. Mondul AM, Weinstein SJ, Moy KA, et al. Circulating 25-Hydroxyvitamin D and Prostate Cancer Survival. *Cancer epidemiology, biomarkers & prevention : a publication of the American Association for Cancer Research, cosponsored by the American Society of Preventive Oncology* 2016;**25**(4):665-9.
5. Webb PM, de Fazio A, Protani MM, et al. Circulating 25-hydroxyvitamin D and survival in women with ovarian cancer. *The American journal of clinical nutrition* 2015;**102**(1):109-14.
6. Heaney RP. Serum 25-hydroxyvitamin D is a reliable indicator of vitamin D status. *The American journal of clinical nutrition* 2011;**94**(2):619-20; author reply 20.
7. Holick MF. Vitamin D deficiency. *The New England journal of medicine* 2007;**357**(3):266-81.
8. Holick MF, Binkley NC, Bischoff-Ferrari HA, et al. Evaluation, treatment, and prevention of vitamin D deficiency: an Endocrine Society clinical practice guideline. *The Journal of clinical endocrinology and metabolism* 2011;**96**(7):1911-30.
9. Sowers MR, Wallace RB, Hollis BW, et al. Parameters related to 25-OH-D levels in a population-based study of women. *The American journal of clinical nutrition* 1986;**43**(4):621-8.
10. Ulrich CM, Holmes RS. Shedding light on colorectal cancer prognosis: vitamin d and beyond. *Journal of clinical oncology : official journal of the American Society of Clinical Oncology* 2008;**26**(18):2937-9.
11. Autier P, Boniol M, Pizot C, et al. Vitamin D status and ill health: a systematic review. *The lancet Diabetes & endocrinology* 2014;**2**(1):76-89.
12. Ballard-Barbash R, Friedenreich CM, Courneya KS, et al. Physical activity, biomarkers, and disease outcomes in cancer survivors: a systematic review. *Journal of the National Cancer Institute* 2012;**104**(11):815-40.
13. Schmid D, Leitzmann MF. Association between physical activity and mortality among breast cancer and colorectal cancer survivors: a systematic review and meta-analysis. *Annals of oncology : official journal of the European Society for Medical Oncology* 2014;**25**(7):1293-311.
14. Arem H, Moore SC, Park Y, et al. Physical activity and cancer-specific mortality in the NIH-AARP Diet and Health Study cohort. *International journal of cancer* 2014;**135**(2):423-31.
15. Brock K, Huang WY, Fraser DR, et al. Low vitamin D status is associated with physical inactivity, obesity and low vitamin D intake in a large US sample of healthy middle-aged men and women. *The Journal of steroid biochemistry and molecular biology* 2010;**121**(1-2):462-6.

16. Scragg R, Camargo CA, Jr. Frequency of leisure-time physical activity and serum 25-hydroxyvitamin D levels in the US population: results from the Third National Health and Nutrition Examination Survey. *American journal of epidemiology* 2008;**168**(6):577-86; discussion 87-91.
17. Wannier M, Richard A, Martin B, et al. Associations between objective and self-reported physical activity and vitamin D serum levels in the US population. *Cancer causes & control* : CCC 2015;**26**(6):881-91.
18. Zittermann A, Sabatschus O, Jantzen S, et al. Exercise-trained young men have higher calcium absorption rates and plasma calcitriol levels compared with age-matched sedentary controls. *Calcified tissue international* 2000;**67**(3):215-9.
19. Yeh JK, Aloia JF, Yasumura S. Effect of physical activity on calcium and phosphorus metabolism in the rat. *The American journal of physiology* 1989;**256**(1 Pt 1):E1-6.
20. Bell NH, Godsen RN, Henry DP, et al. The effects of muscle-building exercise on vitamin D and mineral metabolism. *Journal of bone and mineral research* : the official journal of the American Society for Bone and Mineral Research 1988;**3**(4):369-73.
21. Klausen T, Breum L, Sorensen HA, et al. Plasma levels of parathyroid hormone, vitamin D, calcitonin, and calcium in association with endurance exercise. *Calcified tissue international* 1993;**52**(3):205-8.
22. Teleni L, Baker J, Koczwara B, et al. Clinical outcomes of vitamin D deficiency and supplementation in cancer patients. *Nutrition reviews* 2013;**71**(9):611-21.
23. Churilla TM, Lesko SL, Brereton HD, et al. Serum vitamin D levels among patients in a clinical oncology practice compared to primary care patients in the same community: a case-control study. *BMJ open* 2011;**1**(2):e000397.
24. Centers for Disease Control and Prevention. National Health and Nutrition Examination Survey. <http://www.cdc.gov/nchs/nhanes.htm>. Accessed June 21, 2016.
25. Centers for Disease Control and Prevention. NHANES Laboratory/Medical Technologists Procedures Manual -[https://www.cdc.gov/nchs/data/nhanes/nhanes\\_09\\_10/lab.pdf](https://www.cdc.gov/nchs/data/nhanes/nhanes_09_10/lab.pdf), Accessed June 21, 2016. 2009.
26. Centers for Disease Control and Prevention. Analytical Note for 25-Hydroxyvitamin D Data Analysis using NHANES III (1988-1994), NHANES 2001-2006, and NHANES 2007-2010 - <http://www.cdc.gov/nchs/nhanes/VitaminDAnalyticalNote.aspx>, Accessed June 21, 2016. 2015.
27. Dwyer JT, Picciano MF, Betz JM, et al. Progress in development of an integrated dietary supplement ingredient database at the NIH Office of Dietary Supplements. *Journal of food composition and analysis* : an official publication of the United Nations University, International Network of Food Data Systems 2006;**19**:S108-s14.
28. Ainsworth BE, Haskell WL, Herrmann SD, et al. 2011 Compendium of Physical Activities: a second update of codes and MET values. *Medicine and science in sports and exercise* 2011;**43**(8):1575-81.
29. Navaneethan SD, Kirwan JP, Arrigain S, et al. Overweight, obesity and intentional weight loss in chronic kidney disease: NHANES 1999-2006. *International journal of obesity* (2005) 2012;**36**(12):1585-90.
30. Hallal PC, Andersen LB, Bull FC, et al. Global physical activity levels: surveillance progress, pitfalls, and prospects. *Lancet (London, England)* 2012;**380**(9838):247-57.



- 1
  - 2
  - 3
  - 4
  - 5
  - 6
  - 7
  - 8
  - 9
  - 10
  - 11
  - 12
  - 13
  - 14
  - 15
  - 16
  - 17
  - 18
  - 19
  - 20
  - 21
  - 22
  - 23
  - 24
  - 25
  - 26
  - 27
  - 28
  - 29
  - 30
  - 31
  - 32
  - 33
  - 34
  - 35
  - 36
  - 37
  - 38
  - 39
  - 40
  - 41
  - 42
  - 43
  - 44
  - 45
  - 46
  - 47
  - 48
  - 49
  - 50
  - 51
  - 52
  - 53
  - 54
  - 55
  - 56
  - 57
  - 58
  - 59
  - 60
31. Zhao G, Li C, Ford ES, et al. Leisure-time aerobic physical activity, muscle-strengthening activity and mortality risks among US adults: the NHANES linked mortality study. *British journal of sports medicine* 2014;**48**(3):244-9.
32. Rock CL, Doyle C, Demark-Wahnefried W, et al. Nutrition and physical activity guidelines for cancer survivors. *CA: a cancer journal for clinicians* 2012;**62**(4):243-74.
33. Zhang J, Yu KF. What's the relative risk? A method of correcting the odds ratio in cohort studies of common outcomes. *Jama* 1998;**280**(19):1690-1.
34. Seamans KM, Cashman KD. Existing and potentially novel functional markers of vitamin D status: a systematic review. *The American journal of clinical nutrition* 2009;**89**(6):1997s-2008s.
35. Scragg R, Holdaway I, Singh V, et al. Serum 25-hydroxyvitamin D3 is related to physical activity and ethnicity but not obesity in a multicultural workforce. *Australian and New Zealand journal of medicine* 1995;**25**(3):218-23.
36. Florez H, Martinez R, Chacra W, et al. Outdoor exercise reduces the risk of hypovitaminosis D in the obese. *The Journal of steroid biochemistry and molecular biology* 2007;**103**(3-5):679-81.
37. Skender S, Schrotz-King P, Bohm J, et al. Repeat physical activity measurement by accelerometry among colorectal cancer patients--feasibility and minimal number of days of monitoring. *BMC research notes* 2015;**8**:222.
38. Drincic AT, Armas LA, Van Diest EE, et al. Volumetric dilution, rather than sequestration best explains the low vitamin D status of obesity. *Obesity (Silver Spring, Md)* 2012;**20**(7):1444-8.
39. Friedman CF, DeMichele A, Su HI, et al. Vitamin d deficiency in postmenopausal breast cancer survivors. *Journal of women's health (2002)* 2012;**21**(4):456-62.
40. Vashi PG, Lammersfeld CA, Braun DP, et al. Serum 25-hydroxyvitamin D is inversely associated with body mass index in cancer. *Nutrition journal* 2011;**10**:51.
41. Schottker B, Jorde R, Peasey A, et al. Vitamin D and mortality: meta-analysis of individual participant data from a large consortium of cohort studies from Europe and the United States. *BMJ (Clinical research ed)* 2014;**348**:g3656.
42. Chowdhury R, Kunutsor S, Vitezova A, et al. Vitamin D and risk of cause specific death: systematic review and meta-analysis of observational cohort and randomised intervention studies. *BMJ (Clinical research ed)* 2014;**348**:g1903.
43. Fakih MG, Trump DL, Johnson CS, et al. Chemotherapy is linked to severe vitamin D deficiency in patients with colorectal cancer. *International journal of colorectal disease* 2009;**24**(2):219-24.
44. Fakih MG, Andrews C, McMahon J, et al. A prospective clinical trial of cholecalciferol 2000 IU/day in colorectal cancer patients: evidence of a chemotherapy-response interaction. *Anticancer research* 2012;**32**(4):1333-8.
45. Jacot W, Poudroux S, Thezenas S, et al. Increased prevalence of vitamin D insufficiency in patients with breast cancer after neoadjuvant chemotherapy. *Breast cancer research and treatment* 2012;**134**(2):709-17.
46. Strasser B, Steindorf K, Wiskemann J, et al. Impact of resistance training in cancer survivors: a meta-analysis. *Medicine and science in sports and exercise* 2013;**45**(11):2080-90.
47. Dwyer-Lindgren L, Freedman G, Engell RE, et al. Prevalence of physical activity and obesity in US counties, 2001-2011: a road map for action. *Population health metrics* 2013;**11**:7.

- 1  
2  
3  
4  
5  
6  
7  
8  
9  
10  
11  
12  
13  
14  
15  
16  
17  
18  
19  
20  
21  
22  
23  
24  
25  
26  
27  
28  
29  
30  
31  
32  
33  
34  
35  
36  
37  
38  
39  
40  
41  
42  
43  
44  
45  
46  
47  
48  
49  
50  
51  
52  
53  
54  
55  
56  
57  
58  
59  
60
48. Schmitz KH, Courneya KS, Matthews C, et al. American College of Sports Medicine roundtable on exercise guidelines for cancer survivors. *Medicine and science in sports and exercise* 2010;**42**(7):1409-26.
49. Huy C, Schmidt ME, Vrieling A, et al. Physical activity in a German breast cancer patient cohort: one-year trends and characteristics associated with change in activity level. *European journal of cancer (Oxford, England : 1990)* 2012;**48**(3):297-304.

For peer review only

Table 1. Socio-demographic Characteristics and Leisure Time Physical Activity of Cancer Survivors Aged 20 years or Older from the NHANES (2001 - 2006), by Circulating 25-OHD levels (n=793)

|                                       | N           | Circulating 25-OHD (nmol/L) |                          |                           |                           |                         | P-value    |                        |
|---------------------------------------|-------------|-----------------------------|--------------------------|---------------------------|---------------------------|-------------------------|------------|------------------------|
|                                       |             | Overall                     | Quintile 1<br>(9.1-44.7) | Quintile 2<br>(45.9-56.8) | Quintile 3<br>(58.1-66.8) | Quintile 4<br>(68-80.3) |            | Quintile 5<br>(81-156) |
| 2001-2006                             | 793         | 793                         | 208                      | 160                       | 143                       | 153                     | 129        |                        |
| Age (year)                            | Mean (s.e.) | 60.3 (0.6)                  | 60.1 (1.5)               | 59.4 (1.8)                | 61.0 (1.6)                | 61.9 (1.4)              | 57.6 (1.6) | 0.36                   |
| BMI                                   |             |                             |                          |                           |                           |                         |            | <.001                  |
| <18.5                                 | %           | 1.9                         | 1.9                      | 0.2                       | 1.8                       | 2.6                     | 3.4        |                        |
| 18.5 – 24.9                           | %           | 32.7                        | 29.3                     | 19.4                      | 33.8                      | 35.5                    | 47.1       |                        |
| 25.0 – 29.9                           | %           | 32.1                        | 23.2                     | 36.1                      | 38.4                      | 31.2                    | 32.1       |                        |
| ≥ 30                                  | %           | 33.3                        | 45.6                     | 44.3                      | 26.0                      | 30.7                    | 17.4       |                        |
| Season                                |             |                             |                          |                           |                           |                         |            | 0.12                   |
| Winter (November to April)            | %           | 34.3                        | 43.2                     | 38.8                      | 31.0                      | 26.1                    | 31.5       |                        |
| Summer (May to October)               | %           | 65.7                        | 56.8                     | 61.2                      | 69.0                      | 73.9                    | 68.5       |                        |
| Sex                                   |             |                             |                          |                           |                           |                         |            | 0.52                   |
| Male                                  | %           | 32.7                        | 29.2                     | 32.5                      | 33.3                      | 39.4                    | 38.6       |                        |
| Female                                | %           | 67.3                        | 70.8                     | 67.5                      | 66.7                      | 60.6                    | 70.4       |                        |
| Race                                  |             |                             |                          |                           |                           |                         |            | <.001                  |
| Non-Hispanic white                    | %           | 86.1                        | 72.1                     | 81.9                      | 90.9                      | 93.8                    | 93.6       |                        |
| Non-Hispanic black                    | %           | 6.6                         | 18.7                     | 6.3                       | 2.3                       | 1.7                     | 2.8        |                        |
| Hispanic and other                    | %           | 7.3                         | 9.2                      | 11.8                      | 6.8                       | 4.5                     | 3.6        |                        |
| Smoking                               |             |                             |                          |                           |                           |                         |            | 0.06                   |
| Never smoked                          | %           | 39.1                        | 32.5                     | 42.7                      | 48.7                      | 36.1                    | 36.3       |                        |
| Former smoker                         | %           | 39.8                        | 37.5                     | 34.5                      | 40.5                      | 46.4                    | 40.4       |                        |
| Current smoker                        | %           | 21.1                        | 30.0                     | 22.8                      | 10.8                      | 17.5                    | 23.3       |                        |
| Vitamin D supplement use              |             |                             |                          |                           |                           |                         |            | <.001                  |
| No                                    | %           | 48.6                        | 75.8                     | 52.7                      | 34.8                      | 42.5                    | 34.3       |                        |
| Yes                                   | %           | 51.4                        | 24.2                     | 47.3                      | 65.3                      | 57.5                    | 65.7       |                        |
| Leisure time physical activity (LTPA) |             |                             |                          |                           |                           |                         |            | 0.001                  |

|    |                       |   |      |      |      |      |      |      |       |
|----|-----------------------|---|------|------|------|------|------|------|-------|
| 1  |                       |   |      |      |      |      |      |      |       |
| 2  |                       |   |      |      |      |      |      |      |       |
| 3  |                       |   |      |      |      |      |      |      |       |
| 4  | Inactive              | % | 38.2 | 55.5 | 40.7 | 36.6 | 30.8 | 26.1 |       |
| 5  | Insufficiently Active | % | 33.0 | 27.4 | 35.4 | 29.1 | 39.8 | 33.0 |       |
| 6  | Sufficiently Active   | % | 28.8 | 17.1 | 23.9 | 34.3 | 29.4 | 40.9 |       |
| 7  | Indoor LTPA           |   |      |      |      |      |      |      | 0.08  |
| 8  | Inactive              | % | 61.7 | 70.3 | 67.4 | 53.8 | 61.2 | 54.2 |       |
| 9  | Insufficiently Active | % | 18.2 | 15.3 | 20.1 | 21.5 | 17.4 | 16.7 |       |
| 10 | Sufficiently Active   | % | 20.1 | 14.4 | 12.5 | 24.7 | 21.4 | 29.1 |       |
| 11 |                       |   |      |      |      |      |      |      |       |
| 12 | Outdoor LTPA          |   |      |      |      |      |      |      | <.001 |
| 13 | Inactive              | % | 52.0 | 72.3 | 51.2 | 54.7 | 39.4 | 41.5 |       |
| 14 | Insufficiently Active | % | 22.0 | 12.9 | 24.1 | 15.8 | 29.9 | 27.5 |       |
| 15 | Sufficiently Active   | % | 26.0 | 14.8 | 24.7 | 29.5 | 30.7 | 31.0 |       |
| 16 |                       |   |      |      |      |      |      |      |       |
| 17 |                       |   |      |      |      |      |      |      |       |
| 18 |                       |   |      |      |      |      |      |      |       |
| 19 |                       |   |      |      |      |      |      |      |       |
| 20 |                       |   |      |      |      |      |      |      |       |
| 21 |                       |   |      |      |      |      |      |      |       |
| 22 |                       |   |      |      |      |      |      |      |       |
| 23 |                       |   |      |      |      |      |      |      |       |
| 24 |                       |   |      |      |      |      |      |      |       |
| 25 |                       |   |      |      |      |      |      |      |       |
| 26 |                       |   |      |      |      |      |      |      |       |
| 27 |                       |   |      |      |      |      |      |      |       |
| 28 |                       |   |      |      |      |      |      |      |       |
| 29 |                       |   |      |      |      |      |      |      |       |
| 30 |                       |   |      |      |      |      |      |      |       |
| 31 |                       |   |      |      |      |      |      |      |       |
| 32 |                       |   |      |      |      |      |      |      |       |
| 33 |                       |   |      |      |      |      |      |      |       |
| 34 |                       |   |      |      |      |      |      |      |       |
| 35 |                       |   |      |      |      |      |      |      |       |
| 36 |                       |   |      |      |      |      |      |      |       |
| 37 |                       |   |      |      |      |      |      |      |       |
| 38 |                       |   |      |      |      |      |      |      |       |
| 39 |                       |   |      |      |      |      |      |      |       |
| 40 |                       |   |      |      |      |      |      |      |       |
| 41 |                       |   |      |      |      |      |      |      |       |
| 42 |                       |   |      |      |      |      |      |      |       |
| 43 |                       |   |      |      |      |      |      |      |       |
| 44 |                       |   |      |      |      |      |      |      |       |
| 45 |                       |   |      |      |      |      |      |      |       |
| 46 |                       |   |      |      |      |      |      |      |       |
| 47 |                       |   |      |      |      |      |      |      |       |
| 48 |                       |   |      |      |      |      |      |      |       |
| 49 |                       |   |      |      |      |      |      |      |       |

Table 2. Socio-demographic Characteristics and Leisure Time Physical Activity of Cancer Survivors Aged 20 years or Older from the NHANES (2007- 2010), by Circulating 25-OHD level (n=737)

|                                       |             | Circulating 25-OHD (nmol/L) |                           |                           |                           |                           |                          | P-value |
|---------------------------------------|-------------|-----------------------------|---------------------------|---------------------------|---------------------------|---------------------------|--------------------------|---------|
|                                       |             | Overall                     | Quintile 1<br>(13.2-49.2) | Quintile 2<br>(49.3-63.9) | Quintile 3<br>(64.3-76.5) | Quintile 4<br>(76.6-93.4) | Quintile 5<br>(93.9-206) |         |
| 2007-2010                             | N           | 737                         | 194                       | 153                       | 139                       | 143                       | 108                      |         |
| Age (year)                            | Mean (s.e.) | 60.8 (0.7)                  | 58.9 (1.3)                | 59.8 (1.1)                | 61.7 (1.4)                | 64.3 (1.5)                | 59.3 (2.0)               | 0.35    |
| BMI                                   |             |                             |                           |                           |                           |                           |                          | 0.008   |
| <18.5                                 | %           | 2.0                         | 2.2                       | 0.6                       | 1.5                       | 1.8                       | 3.9                      |         |
| 18.5 – 24.9                           | %           | 27.2                        | 23.1                      | 20.3                      | 21.2                      | 36.7                      | 34.6                     |         |
| 25.0 – 29.9                           | %           | 34.0                        | 24.7                      | 45.5                      | 34.1                      | 30.4                      | 35.6                     |         |
| ≥ 30                                  | %           | 36.8                        | 50.0                      | 33.6                      | 43.2                      | 31.1                      | 25.9                     |         |
| Season                                |             |                             |                           |                           |                           |                           |                          | 0.1     |
| Winter (November to April)            | %           | 32.6                        | 39.7                      | 32.7                      | 34.2                      | 22.4                      | 33.9                     |         |
| Summer (May to October)               | %           | 67.4                        | 60.3                      | 67.3                      | 65.8                      | 77.6                      | 66.1                     |         |
| Sex                                   |             |                             |                           |                           |                           |                           |                          | 0.40    |
| Male                                  | %           | 37.8                        | 29.3                      | 42.8                      | 41.2                      | 39.9                      | 36.2                     |         |
| Female                                | %           | 62.2                        | 70.7                      | 57.2                      | 58.8                      | 60.1                      | 63.8                     |         |
| Race                                  |             |                             |                           |                           |                           |                           |                          | <.001   |
| Non-Hispanic white                    | %           | 82.6                        | 57.3                      | 81.9                      | 88.8                      | 91.5                      | 94.1                     |         |
| Non-Hispanic black                    | %           | 8.2                         | 20.9                      | 7.5                       | 5.3                       | 4.9                       | 2.2                      |         |
| Hispanic and other                    | %           | 9.2                         | 21.8                      | 10.6                      | 5.9                       | 3.6                       | 3.7                      |         |
| Smoking                               |             |                             |                           |                           |                           |                           |                          | 0.03    |
| Never smoked                          | %           | 47.5                        | 48.5                      | 55.1                      | 48.9                      | 43.1                      | 43.8                     |         |
| Former smoker                         | %           | 35.1                        | 26.2                      | 25.8                      | 43.3                      | 43.0                      | 37.2                     |         |
| Current smoker                        | %           | 17.4                        | 25.3                      | 19.1                      | 9.8                       | 13.9                      | 19.0                     |         |
| Vitamin D supplement use              |             |                             |                           |                           |                           |                           |                          | <.001   |
| No                                    | %           | 48.5                        | 81.8                      | 61.1                      | 46.1                      | 32.8                      | 20.0                     |         |
| Yes                                   | %           | 51.5                        | 18.2                      | 38.9                      | 53.9                      | 67.2                      | 80.0                     |         |
| Leisure time physical activity (LTPA) |             |                             |                           |                           |                           |                           |                          | 0.04    |

|    |                       |   |      |      |      |      |      |      |
|----|-----------------------|---|------|------|------|------|------|------|
| 1  |                       |   |      |      |      |      |      |      |
| 2  |                       |   |      |      |      |      |      |      |
| 3  |                       |   |      |      |      |      |      |      |
| 4  | Inactive              | % | 53.3 | 70.8 | 51.7 | 51.3 | 50.9 | 41.6 |
| 5  | Insufficiently Active | % | 16.6 | 12.6 | 20.8 | 15.7 | 14.3 | 19.8 |
| 6  | Sufficiently Active   | % | 30.1 | 16.6 | 27.5 | 33.0 | 34.8 | 38.6 |
| 7  | <hr/>                 |   |      |      |      |      |      |      |
| 8  |                       |   |      |      |      |      |      |      |
| 9  |                       |   |      |      |      |      |      |      |
| 10 |                       |   |      |      |      |      |      |      |
| 11 |                       |   |      |      |      |      |      |      |
| 12 |                       |   |      |      |      |      |      |      |
| 13 |                       |   |      |      |      |      |      |      |
| 14 |                       |   |      |      |      |      |      |      |
| 15 |                       |   |      |      |      |      |      |      |
| 16 |                       |   |      |      |      |      |      |      |
| 17 |                       |   |      |      |      |      |      |      |
| 18 |                       |   |      |      |      |      |      |      |
| 19 |                       |   |      |      |      |      |      |      |
| 20 |                       |   |      |      |      |      |      |      |
| 21 |                       |   |      |      |      |      |      |      |
| 22 |                       |   |      |      |      |      |      |      |
| 23 |                       |   |      |      |      |      |      |      |
| 24 |                       |   |      |      |      |      |      |      |
| 25 |                       |   |      |      |      |      |      |      |
| 26 |                       |   |      |      |      |      |      |      |
| 27 |                       |   |      |      |      |      |      |      |
| 28 |                       |   |      |      |      |      |      |      |
| 29 |                       |   |      |      |      |      |      |      |
| 30 |                       |   |      |      |      |      |      |      |
| 31 |                       |   |      |      |      |      |      |      |
| 32 |                       |   |      |      |      |      |      |      |
| 33 |                       |   |      |      |      |      |      |      |
| 34 |                       |   |      |      |      |      |      |      |
| 35 |                       |   |      |      |      |      |      |      |
| 36 |                       |   |      |      |      |      |      |      |
| 37 |                       |   |      |      |      |      |      |      |
| 38 |                       |   |      |      |      |      |      |      |
| 39 |                       |   |      |      |      |      |      |      |
| 40 |                       |   |      |      |      |      |      |      |
| 41 |                       |   |      |      |      |      |      |      |
| 42 |                       |   |      |      |      |      |      |      |
| 43 |                       |   |      |      |      |      |      |      |
| 44 |                       |   |      |      |      |      |      |      |
| 45 |                       |   |      |      |      |      |      |      |
| 46 |                       |   |      |      |      |      |      |      |
| 47 |                       |   |      |      |      |      |      |      |
| 48 |                       |   |      |      |      |      |      |      |
| 49 |                       |   |      |      |      |      |      |      |

For peer review only

Table 3. Associations between Leisure-Time Physical Activity and Circulating 25-OHD level from Unadjusted and Multivariable Linear Regression models among Cancer Survivors Aged 20 years or Older from the NHANES (2001 - 2010).

| 2001-2006* (n=793) |                                       | Circulating 25-OHD (nmol/L)             |                                         |
|--------------------|---------------------------------------|-----------------------------------------|-----------------------------------------|
|                    |                                       | Unadjusted<br>Beta-coefficient (95% CI) | Adjusted †<br>Beta-coefficient (95% CI) |
| Model 1:           | Leisure time physical activity (LTPA) |                                         |                                         |
|                    | Inactive                              | reference                               | reference                               |
|                    | Insufficiently Active                 | 7.36 (2.65 to 12.07)                    | 3.63 (-0.69 to 7.95)                    |
|                    | Sufficiently Active                   | 12.16 (7.29 to 17.04)                   | 8.07 (4.63 to 11.52)                    |
|                    | P for trend                           | <.001                                   | <.001                                   |
| Model 2:           | Outdoor physical activity             |                                         |                                         |
|                    | Inactive                              | reference                               | reference                               |
|                    | Insufficiently Active                 | 9.10 (5.15 to 13.04)                    | 6.17 (1.74 to 10.59)                    |
|                    | Sufficiently Active                   | 8.84 (4.16 to 13.52)                    | 5.83 (1.64 to 10.01)                    |
|                    | P for trend                           | <.001                                   | 0.005                                   |
|                    | Indoor physical activity              |                                         |                                         |
|                    | Inactive                              | reference                               | reference                               |
|                    | Insufficiently Active                 | 3.15 (-1.63 to 7.94)                    | -1.22 (-4.97 to 2.52)                   |
|                    | Sufficiently Active                   | 8.22 (2.50 to 13.93)                    | 2.93 (-1.80 to 7.66)                    |
|                    | P for trend                           | 0.004                                   | 0.23                                    |
| 2007-2010* (n=737) |                                       | Circulating 25-OHD (nmol/L)             |                                         |
|                    |                                       | Unadjusted<br>Beta-coefficient (95% CI) | Adjusted †<br>Beta-coefficient (95% CI) |
| Model 3:           | Leisure time physical activity (LTPA) |                                         |                                         |
|                    | Inactive                              | reference                               | reference                               |
|                    | Insufficiently Active                 | 8.80 (-2.67 to 20.26)                   | 5.70 (-4.19 to 15.6)                    |
|                    | Sufficiently Active                   | 12.04 (5.24 to 18.84)                   | 5.73 (-1.68 to 13.15)                   |
|                    | P for trend                           | 0.001                                   | 0.11                                    |

\*Leisure-time physical activity (LTPA) data analyzed separately due to the changes in self-reported LTPA measures from wave 2005 - 2006 to 2007-2008.

†Adjusted for age, sex, race, body mass index, smoking status and dietary vitamin D supplement use.

Table 4. Associations between Leisure-Time Physical Activity and Circulating 25-OHD level from Unadjusted and Adjusted Logistic Regression models among Cancer Survivors Aged 20 years or Older from the NHANES (2001 - 2010).

| 2001-2006*                                     |  | Circulating 25-OHD $\geq$ 50 nmol/L (n=534) |                             |
|------------------------------------------------|--|---------------------------------------------|-----------------------------|
| Reference:                                     |  | Unadjusted                                  | Adjusted <sup>†</sup>       |
| Circulating 25-OHD <50 nmol/L (n=259)          |  | Prevalence ratio (95% CI) †                 | Prevalence ratio (95% CI) † |
| Model 1: Leisure time physical activity (LTPA) |  |                                             |                             |
| Inactive                                       |  | reference                                   | reference                   |
| Insufficiently Active                          |  | 1.19 (1.02 to 1.33)                         | 1.10 (0.88 to 1.27)         |
| Sufficiently Active                            |  | 1.36 (1.30 to 1.45)                         | 1.32 (1.19 to 1.41)         |
| P for trend                                    |  | <.001                                       | <.001                       |
| Model 2: Outdoor physical activity             |  |                                             |                             |
| Inactive                                       |  | reference                                   | reference                   |
| Insufficiently Active                          |  | 1.21 (1.10 to 1.30)                         | 1.16 (1.01 to 1.27)         |
| Sufficiently Active                            |  | 1.24 (1.11 to 1.33)                         | 1.22 (1.06 to 1.32)         |
| P for trend                                    |  | 0.001                                       | 0.009                       |
| Indoor physical activity                       |  |                                             |                             |
| Inactive                                       |  | reference                                   | reference                   |
| Insufficiently Active                          |  | 1.19 (0.99 to 1.33)                         | 1.10 (0.87 to 1.27)         |
| Sufficiently Active                            |  | 1.21 (1.05 to 1.33)                         | 1.07 (0.88 to 1.23)         |
| P for trend                                    |  | 0.006                                       | 0.32                        |
| 2007-2010*                                     |  | Circulating 25-OHD $\geq$ 50 nmol/L (n=531) |                             |
| Reference                                      |  | Unadjusted                                  | Adjusted †                  |
| Circulating 25-OHD <50 nmol/L (n=206)          |  | Prevalence ratio (95% CI)                   | Prevalence ratio (95% CI)   |
| Model 3: Leisure time physical activity (LTPA) |  |                                             |                             |
| Inactive                                       |  | reference                                   | reference                   |
| Insufficiently Active                          |  | 1.15 (0.97 to 1.26)                         | 1.14 (0.92 to 1.27)         |
| Sufficiently Active                            |  | 1.22 (1.07 to 1.30)                         | 1.13 (0.90 to 1.27)         |
| P for trend                                    |  | 0.008                                       | 0.18                        |

\*Leisure-time physical activity (LTPA) data analyzed separately due to the changes in self-reported LTPA measures from wave 2005 - 2006 to 2007-2008.

† Prevalence ratio and 95% confidence intervals were corrected using prevalence odds ratio and prevalence of high 25-OHD level



1  
2  
3  
4  
5  
6  
7  
8  
9  
10  
11  
12  
13  
14  
15  
16  
17  
18  
19  
20  
21  
22  
23  
24  
25  
26  
27  
28  
29  
30  
31  
32  
33  
34  
35  
36  
37  
38  
39  
40  
41  
42  
43  
44  
45  
46  
47  
48  
49

(>=50 ol/L) in reference groups.

‡Adjusted for age, sex, race, body mass index, smoking status and dietary vitamin D supplement use.

For peer review only

1  
2  
3  
4  
5  
6  
7  
8  
9  
10  
11  
12  
13  
14  
15  
16  
17  
18  
19  
20  
21  
22  
23  
24  
25  
26  
27  
28  
29  
30  
31  
32  
33  
34  
35  
36  
37  
38  
39  
40  
41  
42  
43  
44  
45  
46  
47  
48  
49  
50  
51  
52  
53  
54  
55  
56  
57  
58  
59  
60

For peer review only

1  
2  
3  
4  
5  
6  
7  
8  
9  
10  
11  
12  
13  
14  
15  
16  
17  
18  
19  
20  
21  
22  
23  
24  
25  
26  
27  
28  
29  
30  
31  
32  
33  
34  
35  
36  
37  
38  
39  
40  
41  
42  
43  
44  
45  
46  
47  
48  
49  
50  
51  
52  
53  
54  
55  
56  
57  
58  
59  
60

Figure 1. Participants flow chart - cancer survivors aged 20 years or older from the National Health and Nutrition Examination Survey (2001 - 2006)

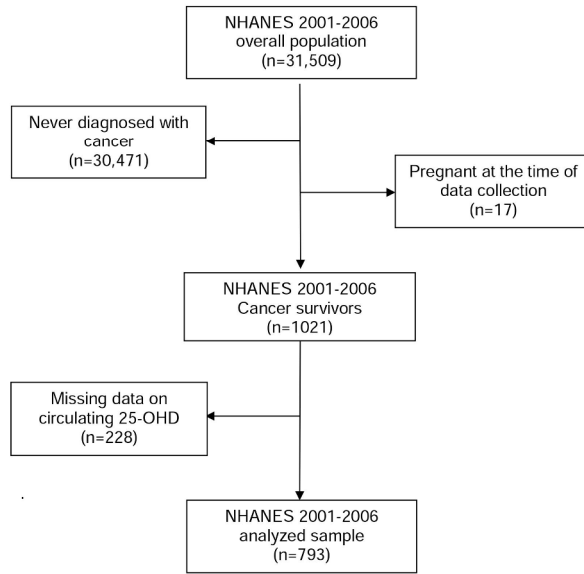

Figure 1. Participants flow chart - cancer survivors aged 20 years or older from the National Health and Nutrition Examination Survey (2001 - 2006)

215x279mm (300 x 300 DPI)

1  
2  
3  
4  
5  
6  
7  
8  
9  
10  
11  
12  
13  
14  
15  
16  
17  
18  
19  
20  
21  
22  
23  
24  
25  
26  
27  
28  
29  
30  
31  
32  
33  
34  
35  
36  
37  
38  
39  
40  
41  
42  
43  
44  
45  
46  
47  
48  
49  
50  
51  
52  
53  
54  
55  
56  
57  
58  
59  
60

Figure 2. Participants flow chart - cancer survivors aged 20 years or older from the National Health and Nutrition Examination Survey (2007-2010).

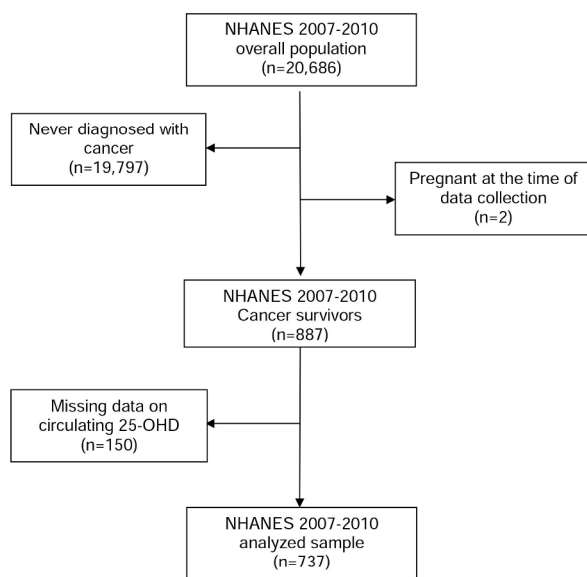

1

Figure 2. Participants flow chart - cancer survivors aged 20 years or older from the National Health and Nutrition Examination Survey (2007-2010)

215x279mm (300 x 300 DPI)

## STROBE Statement—checklist of items that should be included in reports of observational studies

|                              | Item No | Recommendation                                                                                                                                                                                                                                                                                                                                                                                                                                                                                                                                                                                                                                                                                            |
|------------------------------|---------|-----------------------------------------------------------------------------------------------------------------------------------------------------------------------------------------------------------------------------------------------------------------------------------------------------------------------------------------------------------------------------------------------------------------------------------------------------------------------------------------------------------------------------------------------------------------------------------------------------------------------------------------------------------------------------------------------------------|
| <b>Title and abstract</b>    | 1       | (a) Indicate the study's design with a commonly used term in the title or the abstract (Page 1)<br>(b) Provide in the abstract an informative and balanced summary of what was done and what was found (Page 2)                                                                                                                                                                                                                                                                                                                                                                                                                                                                                           |
| <b>Introduction</b>          |         |                                                                                                                                                                                                                                                                                                                                                                                                                                                                                                                                                                                                                                                                                                           |
| Background/rationale         | 2       | Explain the scientific background and rationale for the investigation being reported (page 4)                                                                                                                                                                                                                                                                                                                                                                                                                                                                                                                                                                                                             |
| Objectives                   | 3       | State specific objectives, including any prespecified hypotheses (Page 5)                                                                                                                                                                                                                                                                                                                                                                                                                                                                                                                                                                                                                                 |
| <b>Methods</b>               |         |                                                                                                                                                                                                                                                                                                                                                                                                                                                                                                                                                                                                                                                                                                           |
| Study design                 | 4       | Present key elements of study design early in the paper (Page 6)                                                                                                                                                                                                                                                                                                                                                                                                                                                                                                                                                                                                                                          |
| Setting                      | 5       | Describe the setting, locations, and relevant dates, including periods of recruitment, exposure, follow-up, and data collection (Page 6)                                                                                                                                                                                                                                                                                                                                                                                                                                                                                                                                                                  |
| Participants                 | 6       | (a) <i>Cohort study</i> —Give the eligibility criteria, and the sources and methods of selection of participants. Describe methods of follow-up<br><i>Case-control study</i> —Give the eligibility criteria, and the sources and methods of case ascertainment and control selection. Give the rationale for the choice of cases and controls<br><i>Cross-sectional study</i> —Give the eligibility criteria, and the sources and methods of selection of participants (Page 6)<br>(b) <i>Cohort study</i> —For matched studies, give matching criteria and number of exposed and unexposed<br><i>Case-control study</i> —For matched studies, give matching criteria and the number of controls per case |
| Variables                    | 7       | Clearly define all outcomes, exposures, predictors, potential confounders, and effect modifiers. Give diagnostic criteria, if applicable (Page 7-10)                                                                                                                                                                                                                                                                                                                                                                                                                                                                                                                                                      |
| Data sources/<br>measurement | 8*      | For each variable of interest, give sources of data and details of methods of assessment (measurement). Describe comparability of assessment methods if there is more than one group (Page 7-10)                                                                                                                                                                                                                                                                                                                                                                                                                                                                                                          |
| Bias                         | 9       | Describe any efforts to address potential sources of bias                                                                                                                                                                                                                                                                                                                                                                                                                                                                                                                                                                                                                                                 |
| Study size                   | 10      | Explain how the study size was arrived at (Page 6, Figures 1 and 2)                                                                                                                                                                                                                                                                                                                                                                                                                                                                                                                                                                                                                                       |
| Quantitative variables       | 11      | Explain how quantitative variables were handled in the analyses. If applicable, describe which groupings were chosen and why (Page 7-11)                                                                                                                                                                                                                                                                                                                                                                                                                                                                                                                                                                  |
| Statistical methods          | 12      | (a) Describe all statistical methods, including those used to control for confounding (Page 11-12)<br>(b) Describe any methods used to examine subgroups and interactions (Page 11-12)<br>(c) Explain how missing data were addressed<br>(d) <i>Cohort study</i> —If applicable, explain how loss to follow-up was addressed<br><i>Case-control study</i> —If applicable, explain how matching of cases and controls was addressed<br><i>Cross-sectional study</i> —If applicable, describe analytical methods taking account of sampling strategy (Page 11)<br>(e) Describe any sensitivity analyses (Page 12)                                                                                           |

Continued on next page

**Results**

|                  |     |                                                                                                                                                                                                                                                                                                                                                                                                                                        |
|------------------|-----|----------------------------------------------------------------------------------------------------------------------------------------------------------------------------------------------------------------------------------------------------------------------------------------------------------------------------------------------------------------------------------------------------------------------------------------|
| Participants     | 13* | (a) Report numbers of individuals at each stage of study—eg numbers potentially eligible, examined for eligibility, confirmed eligible, included in the study, completing follow-up, and analysed (Page 13)<br>(b) Give reasons for non-participation at each stage<br>(c) Consider use of a flow diagram (Figures 1 and 2)                                                                                                            |
| Descriptive data | 14* | (a) Give characteristics of study participants (eg demographic, clinical, social) and information on exposures and potential confounders (Page 13)<br>(b) Indicate number of participants with missing data for each variable of interest<br>(c) <i>Cohort study</i> —Summarise follow-up time (eg, average and total amount)                                                                                                          |
| Outcome data     | 15* | <i>Cohort study</i> —Report numbers of outcome events or summary measures over time<br><i>Case-control study</i> —Report numbers in each exposure category, or summary measures of exposure<br><i>Cross-sectional study</i> —Report numbers of outcome events or summary measures (Page 13)                                                                                                                                            |
| Main results     | 16  | (a) Give unadjusted estimates and, if applicable, confounder-adjusted estimates and their precision (eg, 95% confidence interval). Make clear which confounders were adjusted for and why they were included (Page 13-14)<br>(b) Report category boundaries when continuous variables were categorized (Page 7-10)<br>(c) If relevant, consider translating estimates of relative risk into absolute risk for a meaningful time period |
| Other analyses   | 17  | Report other analyses done—eg analyses of subgroups and interactions, and sensitivity analyses (Page 14)                                                                                                                                                                                                                                                                                                                               |

**Discussion**

|                  |    |                                                                                                                                                                                         |
|------------------|----|-----------------------------------------------------------------------------------------------------------------------------------------------------------------------------------------|
| Key results      | 18 | Summarise key results with reference to study objectives (Page 16)                                                                                                                      |
| Limitations      | 19 | Discuss limitations of the study, taking into account sources of potential bias or imprecision. Discuss both direction and magnitude of any potential bias (Page 19)                    |
| Interpretation   | 20 | Give a cautious overall interpretation of results considering objectives, limitations, multiplicity of analyses, results from similar studies, and other relevant evidence (Page 16-18) |
| Generalisability | 21 | Discuss the generalisability (external validity) of the study results (Page 19-20)                                                                                                      |

**Other information**

|         |    |                                                                                                                                                                         |
|---------|----|-------------------------------------------------------------------------------------------------------------------------------------------------------------------------|
| Funding | 22 | Give the source of funding and the role of the funders for the present study and, if applicable, for the original study on which the present article is based (Page 22) |
|---------|----|-------------------------------------------------------------------------------------------------------------------------------------------------------------------------|

\*Give information separately for cases and controls in case-control studies and, if applicable, for exposed and unexposed groups in cohort and cross-sectional studies.

**Note:** An Explanation and Elaboration article discusses each checklist item and gives methodological background and published examples of transparent reporting. The STROBE checklist is best used in conjunction with this article (freely available on the Web sites of PLoS Medicine at <http://www.plosmedicine.org/>, Annals of Internal Medicine at <http://www.annals.org/>, and Epidemiology at <http://www.epidem.com/>). Information on the STROBE Initiative is available at [www.strobe-statement.org](http://www.strobe-statement.org).

# BMJ Open

## Leisure-time physical activity and circulating 25-hydroxyvitamin D levels in cancer survivors, a cross-sectional analysis using data from the US National Health and Nutrition Examination Survey

|                                 |                                                                                                                                                                                                                 |
|---------------------------------|-----------------------------------------------------------------------------------------------------------------------------------------------------------------------------------------------------------------|
| Journal:                        | <i>BMJ Open</i>                                                                                                                                                                                                 |
| Manuscript ID                   | bmjopen-2017-016064.R2                                                                                                                                                                                          |
| Article Type:                   | Research                                                                                                                                                                                                        |
| Date Submitted by the Author:   | 24-Apr-2017                                                                                                                                                                                                     |
| Complete List of Authors:       | Yang, Lin; Medizinische Universitat Wien, Epidemiology; Washington University in Saint Louis School of Medicine, Surgery<br>Toriola, Adetunji; Washington University in Saint Louis School of Medicine, Surgery |
| <b>Primary Subject Heading</b>: | Epidemiology                                                                                                                                                                                                    |
| Secondary Subject Heading:      | Oncology                                                                                                                                                                                                        |
| Keywords:                       | Cancer survivor, cancer prognosis, vitamin D, physical activity, NHANES                                                                                                                                         |
|                                 |                                                                                                                                                                                                                 |

SCHOLARONE™  
Manuscripts

1  
2  
3 **Title: Leisure-time physical activity and circulating 25-hydroxyvitamin D levels in**  
4 **cancer survivors, a cross-sectional analysis using data from the US National**  
5 **Health and Nutrition Examination Survey**  
6  
7  
8  
9

10  
11  
12 Lin Yang PhD<sup>1,2</sup>, Adetunji T. Toriola MD, PhD<sup>1</sup>  
13  
14

15  
16  
17  
18 1. The Division of Public Health Sciences, Department of Surgery, Washington  
19 University School of Medicine and Siteman Cancer Center, St Louis, Missouri, USA  
20  
21

22  
23  
24 2. Department of Epidemiology, Medical University of Vienna, Vienna, Austria  
25  
26  
27

28  
29 Correspondence to:  
30

31 Adetunji T. Toriola  
32

33  
34 The Division of Public Health Sciences, Department of Surgery,  
35

36 660 S. Euclid Avenue, Campus Box 8100  
37

38 St. Louis, MO 63110, USA  
39

40 Telephone: (314) 268-2668  
41

42 Email: [toriolaa@wudosis.wustl.edu](mailto:toriolaa@wudosis.wustl.edu)  
43  
44  
45  
46  
47  
48

49 Keywords: cancer survivor, cancer prognosis, vitamin D, physical activity, NHANES  
50  
51

52 Abstract: 294 words  
53  
54

55 Text: 3,912 words  
56  
57  
58  
59  
60



## Abstract

**Objectives:** Circulating 25-hydroxyvitamin D (25-OHD) is associated with improved cancer prognosis in some studies, yet it may be a surrogate marker for physical activity. We investigated the associations of leisure-time physical activity (LTPA) with circulating 25-OHD levels in cancer survivors, and determined whether associations differ by indoor and outdoor activity.

**Design:** Cross-sectional study.

**Setting:** The US National Health and Nutrition Examination Survey (NHANES).

**Participants:** Cancer survivors with available data on demographic information, measures of adiposity, smoking history, self-reported LTPA, circulating 25-OHD levels in five waves of NHANES (2001-2010).

**Main outcomes measures:** Circulating 25-OHD levels.

**Results:** Multivariable linear regression and logistic regression models were used to evaluate the associations of self-reported LTPA with 25-OHD, adjusting for potential confounders. Due to the differences in LTPA measure, the analyses were conducted separately for 2001-2006, and 2007-2010 data. We further estimated associations by indoor and outdoor activity in the 2001-2006 data. There were 1,530 cancer survivors (mean age=60.5 years, mean BMI=28.6 kg/m<sup>2</sup>). The prevalent cancer sites were breast (19.3%), prostate (18.8%), cervix (10.4%), and colon (8.6%). Compared to inactive cancer survivors, being physically active was associated with higher circulating 25-OHD levels (8.07 nmol/L, 95%CI: 4.63 to 11.52) for 2001-2006 data. In the mutually adjusted model, higher outdoor activity (5.83 nmol/L, 95%CI: 1.64 to 10.01), but not indoor activity (2.93 nmol/L, 95%CI: -1.80 to 7.66), was associated with statistically significant

1  
2  
3 higher 25-OHD levels. The interaction between indoor and outdoor activities was,  
4  
5 however, not significant (P-value=0.29). The only statistically significant association  
6  
7  
8 seen in the 2007-2010 data was among obese cancer survivors.  
9

10 **Conclusion:** Physical activity, particularly outdoor activity is associated with higher 25-  
11  
12 OHD levels in cancer survivors. In view of the possible beneficial effects of vitamin D on  
13  
14 cancer prognosis, engaging in outdoor physical activity could provide clinically  
15  
16 meaningful increases in 25-OHD levels among cancer survivors.  
17  
18  
19  
20  
21  
22  
23

#### 24 **Strengths and limitations of this study**

- 25  
26  
27 • To the best of our knowledge, this is the first study to investigate the association  
28  
29 of leisure-time physical activity (LTPA) with circulating 25-hydroxyvitamin D (25-  
30  
31 OHD) levels in cancer survivors. We further compared associations by outdoor  
32  
33 and indoor LTPA.  
34  
35
- 36  
37 • The current study pooled data from cancer survivors in a nationally  
38  
39 representative adult sample in the US.  
40  
41
- 42  
43 • This study controlled for a range of factors that are known to affect circulating 25-  
44  
45 OHD levels.  
46  
47
- 48  
49 • Study limitations includes (1), the cross-sectional nature makes it impossible to  
50  
51 determine a causal association; (2) season, an important determinant of 25-OHD  
52  
53 levels, was categorized into 2 (winter and summer, rather than winter, summer,  
54  
55 fall and spring); (3) physical activity was self-reported.  
56  
57  
58  
59  
60

## Background

There are >15.5 million cancer survivors in the US and the number is expected to rise to 20 million by 2026.<sup>1</sup> Identifying factors, particularly modifiable factors, that improve prognosis and survival in this rapidly expanding demographic group is, therefore, a high priority.

There is emerging evidence that vitamin D status is associated with improved cancer prognosis and survival, particularly colorectal and breast cancers.<sup>2-5</sup> Circulating 25-hydroxyvitamin D (25-OHD) is the best indicator of overall vitamin D status because it has a long half-life, is unregulated by homeostatic systems in the body, and reflects total vitamin D from multiple determinants.<sup>6-9</sup> However, it has been suggested that circulating 25-OHD level may be a surrogate or biological marker for lifestyle factors that impact cancer prognosis, notably physical activity.<sup>2 10 11</sup> Physical activity, before and after cancer diagnosis, is associated with reduced mortality in cancer survivors,<sup>12-14</sup> although the underlying mechanisms are still being elucidated. In cancer-free population, leisure-time physical activity is associated with an increase in circulating 25-OHD levels; which is thought to reflect exposure to sunlight, a major determinant of circulating 25-OHD levels.<sup>15</sup> In support, studies have reported higher 25-OHD levels for the same amount of outdoor, compared to indoor physical activity,<sup>16</sup> although others have not.<sup>17</sup> Nevertheless, it has also been shown that physical activity and sun exposure may have independent effects on circulating 25-OHD levels, suggesting that indoor physical activity might be sufficient to increase circulating 25-OHD levels through its effect on 25-OHD metabolism, such as 1,25-dihydroxyvitamin.<sup>18-21</sup>

1  
2  
3  
4  
5  
6 To the best of our knowledge, no study has investigated the associations of physical  
7  
8 activity with circulating 25-OHD levels in cancer survivors. Because physical activity  
9  
10 declines after cancer diagnosis, findings in cancer-free population may not apply to  
11  
12 cancer survivors. Using data from the National Health and Nutrition Examination Survey  
13  
14 (NHANES), our objectives are to (i) investigate the associations of leisure-time physical  
15  
16 activity with circulating 25-OHD levels in cancer survivors, (ii) determine whether  
17  
18 associations differ by indoor and outdoor physical activity. Study findings could have  
19  
20 implications for public health recommendations in cancer survivors because physical  
21  
22 inactivity and vitamin D insufficiency are prevalent among cancer survivors.<sup>22 23</sup>  
23  
24  
25  
26  
27  
28  
29  
30  
31  
32  
33  
34  
35  
36  
37  
38  
39  
40  
41  
42  
43  
44  
45  
46  
47  
48  
49  
50  
51  
52  
53  
54  
55  
56  
57  
58  
59  
60

## Methods

### Study Population

The National Health and Nutrition Examination Survey (NHANES) was designed to provide cross-sectional estimates on the prevalence of health, nutrition, and potential risk factors among the civilian non-institutionalized U.S. population up to 85 years of age.<sup>24</sup> In brief, NHANES surveys a nationally representative complex, stratified, multistage, probability clustered sample of about 5,000 participants each year in 15 counties across the country. The NHANES obtained approval from the National Center for Health Statistics Research Ethics Review Board and participants provided written consent.

We extracted demographic information, measures of adiposity, smoking history, self-reported leisure time physical activity, circulating 25-OHD levels, cancer diagnosis, and combined them into a single dataset for each data collection wave. Participants were considered as cancer survivors if they answered “yes” to the question “Have you ever been told by a doctor or other health professional that you had cancer or a malignancy of any kind?” We excluded participants who had non-melanoma skin cancer. This interview question was only given to males and females 20 years or older, subsequently restricted the analysed sample to adult cancer survivors. We created a single dataset for each wave of data from NHANES in 2001 to 2002, 2003 to 2004, 2005 to 2006, 2007 to 2008, and 2009 to 2010, and excluded those who were never diagnosed with cancer, or were pregnant. (Figures 1 and 2)

### Circulating 25-OHD levels

The process of blood collection is detailed in the NHANES Laboratory/Medical Technologist Procedures Manual.<sup>25</sup> Participants who received chemotherapy within last 4 weeks were excluded from blood collection in the NHANES study. Blood samples were collected, processed, stored and shipped to University of Washington, Seattle for testing. The lab method measuring 25-OHD for 2007-2010 changed from 2005-2006 and earlier in NHANES, and has been described previously.<sup>26</sup> Briefly, circulating 25-OHD concentrations were measured at the National Center for Environmental health, CDC, Atlanta, GA using the DiaSorin RIA kit (Stillwater, MN) between 2001 and 2006. We converted the 25-OHD data in 2001-2006 using provided regression to equivalent 25-OHD measurement from a standardized liquid chromatography-tandem mass spectrometry (LC-MS/MS) method, which was used in the analysis of 25-OHD in NHANES 2007-2010 data. This standardization procedure therefore ensures that 25-OHD data is comparable between 2001-2006 and 2007-2010.

### Socio-demographic characteristics

Socio-demographic characteristics including age, sex, race and ethnicity, and smoking status were extracted. Based on self-reported race and ethnicity, participants were classified into one of the three racial/ethnic groups: Non-Hispanic White, Non-Hispanic Black, and Hispanic and others. We classified participants into three groups: never smokers (did not smoke 100 cigarettes and do not smoke now), former smokers (smoked 100 cigarettes in life and do not smoke now), and current smokers (smoked 100 cigarettes in life and smoke now).

### Body mass index (BMI)

Weight and height were measured at the time of physical examination in a mobile examination centre or in the participant's home. The measurements followed standard procedures and were carried out by trained technicians using standardized equipment. BMI was calculated as weight in kg/(height in meters)<sup>2</sup>. We categorized study participants into standard BMI categories: underweight (<18.5kg/m<sup>2</sup>), normal weight (18.5-24.9 kg/m<sup>2</sup>), overweight (25.0 – 29.9 kg/m<sup>2</sup>), and obese (≥30.0 kg/m<sup>2</sup>). For analytic purposes, we combined those who were underweight and those who had normal weight into 1 category (≤25 kg/m<sup>2</sup>).

### Season of blood draw

Blood samples were collected at the time of physical examination in a mobile examination center (MEC) or in the participants' home. Season of blood draw was determined from the documented month of physical examination. Months were reported in two groups: November 1<sup>st</sup> through April 30<sup>th</sup>, or May 1<sup>st</sup> through October 31<sup>st</sup>, and classified into winter or summer, respectively.<sup>16</sup>

### Dietary Vitamin D supplement use

Information on dietary vitamin D supplement was retrieved from the 30-day Dietary Supplement dataset in the 2001-2006 and 2007-2010 data. In the 2001-2006 dataset, we obtained data on individual product for participants who reported taking vitamin supplement, and linked to the Dietary Supplements Ingredient Database.<sup>27</sup> Products'

1  
2  
3 ingredient that contained Vitamin D were aggregated for each participant, and then  
4  
5 categorized into a binary variable (yes/no) for dietary vitamin D supplement use  
6  
7  
8 assessment. In 2007-2010 data, aggregated information on dietary supplement use  
9  
10 (including vitamin D supplement use) was available, thus, was used to determine  
11  
12 participants' dietary vitamin D supplement use (yes/no).  
13  
14

### 15 16 17 Self-reported leisure-time physical activity (LTPA) 18

19  
20 The assessment on self-reported physical activity for 2007-2010 changed from 2005-  
21  
22 2006 and earlier. There is no conversion provided between two assessments, therefore  
23  
24 analyses for LTPA were conducted separately for the 2001 – 2006, and 2007 – 2010  
25  
26 data.  
27  
28

29  
30  
31 In the 2001-2006 data, participants self-reported specific LTPA in the past 30 days from  
32  
33 a list of 48 activities, that if they engaged in certain activities, and the frequencies and  
34  
35 durations of these activities. Each activity was coded into a metabolic equivalent task  
36  
37 (MET) score based on the 2011 Compendium of Physical Activities, a valid and globally  
38  
39 used instrument to quantify the energy expenditure of physical activity in adults.<sup>28</sup> For  
40  
41 each reported activity, MET-minutes per week (MET-min/week) were calculated by  
42  
43 multiplying the MET value of each reported activity by the minutes spent in the activity  
44  
45 per seven days. Overall LTPA was summarized as the total MET-minutes per week of  
46  
47 all reported activities.<sup>29</sup> Cancer survivors were classified as inactive (zero MET-  
48  
49 min/week), insufficiently active (<750 MET-min/week), and sufficiently active (≥750  
50  
51 MET-min/week) based on the standard definition.<sup>29</sup> In addition, we categorized each of  
52  
53  
54  
55  
56  
57  
58  
59  
60



1  
2  
3 the 48 listed activities into outdoor (e.g., walking, jogging, fishing) or indoor (e.g.,  
4  
5 aerobics, bowling, weights) activity. Activities that could be either indoor or outdoor  
6  
7 (e.g., bicycling, swimming) were classified as indoor to ensure a conservative estimation  
8  
9 of the associations between outdoor LTPA and 25-OHD. Both indoor and outdoor LTPA  
10  
11 were summarized in MET-min/week, then classified as inactive (zero MET-min/week),  
12  
13 insufficiently active (<450 MET-min/week), and sufficiently active ( $\geq$ 450 MET-min/week).  
14  
15 A cutoff lower than 750 MET-min/week was used for indoor and outdoor activity, given  
16  
17 they are sub-sets of overall LTPA. We used 450 MET-min/week as the cut-off given is  
18  
19 the minimal goal of weekly LTPA.<sup>29</sup>  
20  
21  
22  
23  
24  
25  
26

27 In the 2007-2010 data, participants self-reported their daily activities, leisure time  
28  
29 activities, and sedentary activities, using questions based on the Global Physical  
30  
31 Activity Questionnaire (GPAQ).<sup>30</sup> Levels of LTPA were calculated as the minutes per  
32  
33 week that participants reported participating in moderate-to-vigorous-intensity physical  
34  
35 activity (MVPA). Participants reported the number of days and minutes spent in  
36  
37 moderate recreational and vigorous recreational activities in a typical week, by  
38  
39 answering questions “In a typical week, on how many days do you do vigorous-intensity  
40  
41 sports, fitness or recreational activities?”, “Minutes vigorous recreational activities”, “In a  
42  
43 typical week, on how many days do you do moderate-intensity sports, fitness or  
44  
45 recreational activities?”, and “Minutes moderate recreational activities”. We summarized  
46  
47 the total number of minutes for both activities, where the number of minutes spent in  
48  
49 vigorous-intensity physical activity were doubled and added to the number of minutes of  
50  
51 moderate-intensity physical activity to approximately equivalent the MET value.<sup>31</sup>  
52  
53  
54  
55  
56  
57  
58  
59  
60

1  
2  
3  
4  
5  
6  
7  
8  
9  
10  
11  
12  
13  
14  
15  
16  
17  
18  
19  
20  
21  
22  
23  
24  
25  
26  
27  
28  
29  
30  
31  
32  
33  
34  
35  
36  
37  
38  
39  
40  
41  
42  
43  
44  
45  
46  
47  
48  
49  
50  
51  
52  
53  
54  
55  
56  
57  
58  
59  
60

Cancer survivors were classified as inactive (zero min/week MVPA), insufficiently active (<150 min/week MVPA), and sufficiently active ( $\geq$ 150 min/week MVPA) based on the physical activity guidelines for cancer survivors.<sup>32</sup>

For peer review only

## Statistical Analysis

Survey analysis procedures were used to account for the sample weights (MEC exam weight), stratification, and clustering of the complex sampling design to ensure nationally representative estimates. Information on socio-demographic characteristics, weight, height, season of blood draw, and self-reported LTPA was complete among cancer survivors who had available data on circulating 25-OHD levels. We calculated the descriptive statistics for participants' characteristics and LTPA categories by 25-OHD levels in quintiles separately in 2001-2006 data, and 2007-2010 data. We summarized weighted means and standard errors for continuous variables, and weighted proportions for categorical variables.

We estimated linear associations between LTPA and 25-OHD levels in both 2001-2006 and 2007-2010 data. The multivariable linear regression models for LTPA were adjusted for age, sex, race, BMI, smoking status, and season of blood draw. In the 2001-2006 data, we further estimated the linear associations between LTPA and 25-OHD separately by indoor and outdoor activities. Chi-square test indicated significant difference ( $P$ -value $<0.001$ ) between indoor and outdoor activities. In the multivariable linear regression models, we simultaneously adjusted for both activities. We tested for differences between the indoor and outdoor effects by including both in the regression model and testing for interaction. We examined the normality of residuals by kernel density estimate and standardized normal probability plots for all the linear regression models. Continuous 25-OHD data was categorized as low ( $<50$  nmol/L) and high ( $\geq 50$  nmol/L) 25-OHD based on definitions of vitamin D insufficiency.<sup>30</sup>

1  
2  
3  
4  
5  
6 To calculate the prevalence ratios (PRs) of high 25-OHD level ( $\geq 50$  nmol/L) across  
7  
8 LTPA categories, we first calculated prevalence odds ratios (PORs) for each category in  
9  
10 multivariable logistic regression models. Since the PORs do not approximate the PRs  
11  
12 for common outcome (25-OHD  $\geq 50$  nmol/L), we used the baseline prevalence to correct  
13  
14 the PORs and 95% confidence intervals based on existing method to obtain reliable  
15  
16 PRs estimates.<sup>33</sup> We further conducted following sensitivity analyses: 1) using BMI as a  
17  
18 continuous variable in the regression models; 2) stratification by BMI category; 3)  
19  
20 classifying activities that could be either indoor or outdoor (e.g., bicycling, swimming) as  
21  
22 outdoor activities; 4) classifying activities that could be either indoor or outdoor (e.g.,  
23  
24 bicycling, swimming) as half-half (MET-min/week) to indoor and outdoor activities.  
25  
26  
27 All statistical significance was set at  $p < 0.05$ . All statistical analyses were performed  
28  
29  
30 using Stata version 14.0 (STATA Corp., College Station, Texas, USA).  
31  
32  
33  
34  
35  
36  
37  
38  
39  
40  
41  
42  
43  
44  
45  
46  
47  
48  
49  
50  
51  
52  
53  
54  
55  
56  
57  
58  
59  
60

## Results

Our study population consisted of 1,530 cancer survivors who had data on circulating 25-OHD levels. The most prevalent cancer sites were breast cancer (19.3%), prostate (18.8%), cervix (10.4%), and colon (8.6%). Participants' mean age at the time of baseline examination was 60.5 years, and their mean BMI was 28.6 kg/m<sup>2</sup>. Circulating 25-OHD levels were significantly higher among those who reported dietary vitamin D supplement use than those who did not in both 2001-2006 (68.82 vs 56.74 nmol/L,  $p < .001$ ) and 2007-2010 data (83.73 vs 60.88 nmol/L,  $p < .001$ ). We observed statistically significant differences in circulating 25-OHD levels for most characteristics, except for age, and sex (Tables 1 (2001-2006) and 2 (2007-2010)). Cancer survivors who were obese, Non-Hispanic Black, or smokers had lower 25-OHD levels than those who had normal weight, Non-Hispanic White/Hispanic and were non-smokers, respectively.

[Insert Table 1 and Table 2]

### Associations between LTPA and Circulating 25-OHD levels

Tables 3 and 4 summarize both the non-adjusted and adjusted associations between LTPA and circulating 25-OHD in linear regression and logistic regression models, respectively. Because LTPA measure differed between 2001-2006 and 2007-2010 and there is no conversion between the two, it is not possible to compare the findings between two study phrases directly. Cancer survivors who were sufficiently active had higher circulating 25-OHD levels than those who were inactive in univariate analyses, and these findings were maintained in multivariable analyses in the 2001-2006, but not the 2007-2010 data. This translated to 8.07 nmol/L (95% CI: 4.63 to 11.52) higher 25-

1  
2  
3 OHD levels in 2001-2006 phase in the multivariable-adjusted models. Furthermore, the  
4 comprehensive data on a list of 48 activities collected in 2001-2006 allowed us to  
5 extend the analyses to compare between indoor and outdoor LTPA in relation to 25-  
6 OHD levels. In the non-adjusted models (Table 3), higher levels of indoor and outdoor  
7 LTPA both were associated with higher 25-OHD levels. However, in multivariable-  
8 adjusted models (that also mutually adjusted for indoor and outdoor LTPA), the  
9 association was only statistically significant among cancer survivors who engaged in  
10 outdoor LTPA (5.83 nmol/L, 95% CI: 1.64 to 10.01). The interaction between indoor and  
11 outdoor activities was not significant (P-value=0.29). Analyses using logistic regression  
12 models were supportive. Our findings were similar when we classified activities that  
13 could be either indoor or outdoor (e.g., bicycling, swimming) as outdoor activities (6.39  
14 nmol/L, 95% CI: 2.85-9.94), and classifying these activities as half-half (MET-in/week) to  
15 indoor and outdoor activities (7.26 nmol/L, 95% CI: 2.88-11.64) (Data not shown).  
16  
17  
18  
19  
20  
21  
22  
23  
24  
25  
26  
27  
28  
29  
30  
31  
32  
33  
34  
35

36 Likewise, we observed similar results in sensitivity analyses using BMI as a continuous  
37 variable; higher 25-OHD levels were associated with LTPA in the overall analyses (7.74  
38 nmol/L, 95% CI: 4.53-10.95), and among those who engaged in outdoor LTPA (5.82  
39 nmol/L, 95% CI: 1.69-9.95) (Data not shown). In stratified analyses, associations of  
40 LTPA with higher circulating 25-OHD levels was retained in the obese group in the  
41 2001-2006 data (7.10 nmol/L, 95% CI: 2.51 to 11.70, outdoor LTPA) as well as 2007-  
42 2010 data (13.91 nmol/L, 95% CI: 3.86-23.96, overall LTPA) (Supplementary tables).  
43  
44  
45  
46  
47  
48  
49  
50  
51  
52  
53 The stratified analyses should, however, be interpreted cautiously because the relatively  
54 small number of participants in the different strata may not allow for very robust effect  
55  
56  
57  
58  
59  
60

1  
2  
3 estimates. Outdoor LTPA was lower in Non-Hispanic Black (69.2% inactive vs. 51.5%  
4  
5 inactive among Non-Hispanic Whites, and 43.2% inactive among Hispanics) (Data not  
6  
7 shown).  
8  
9

10  
11  
12 [Insert Table 3 and Table 4]  
13  
14  
15  
16  
17  
18  
19  
20  
21  
22  
23  
24  
25  
26  
27  
28  
29  
30  
31  
32  
33  
34  
35  
36  
37  
38  
39  
40  
41  
42  
43  
44  
45  
46  
47  
48  
49  
50  
51  
52  
53  
54  
55  
56  
57  
58  
59  
60

For peer review only

## Discussion

We observed that being physically active was associated with higher circulating 25-OHD levels in a nationally representative sample of cancer survivors. Further analyses showed that the elevated 25-OHD levels were only statistically significant among cancer survivors who engaged in outdoor physical activity.

To the best of our knowledge, this is the first study to evaluate the associations of physical activity with circulating 25-OHD levels in cancer survivors. Our findings are, however, similar to what has been reported among non-cancer participants enrolled in NHANES (1988-1994).<sup>16</sup> Scragg and Camargo reported a 9.6 nmol/L increase in 25-OHD levels among participants who engaged in outdoor LTPA compared to those who did not engage in outdoor LTPA. The increase in 25-OHD levels associated with outdoor LTPA is higher than what we observed in our study population (5.83 nmol/L higher 25-OHD). This could be due to the different ways LTPA was categorized. The most active group in their study translates to participating daily in outdoor activity, whilst only 5.6% (weighted proportion) of cancer survivors in our sample achieved this physical activity level. To compare at an equivalently active level, our findings of a 5.83 nmol/L increase in cancer survivors is similar to 6.1 nmol/L higher 25-OHD level in individuals who were at a similar activity level (engaged in 13-30 times outdoor LTPA per month) reported by Scragg and Camargo.<sup>16</sup> Data from trials have shown that each 40 IU of vitamin D consumed increases serum 25-OHD concentrations by 0.53 nmol/L in adults.<sup>34</sup> The recommended dietary vitamin D allowance for adults in the US is 600 IU, which is expected to increase circulating 25-OHD levels by 15 nmol/L. Thus, our findings (a 5.83 nmol/L increase) suggests that engaging in outdoor LTPA could provide



1  
2  
3 clinically meaningful increases in 25-OHD levels among cancer survivors. A more  
4 recent analysis using NHANES 2003-2006 data reported increasing level of 25-OHD  
5 associated with higher level of objectively measured moderate-to-vigorous physical  
6 activity, but the association was not stronger for outdoor LTPA compared to indoor  
7 when using self-reported data.<sup>17</sup>  
8  
9

10  
11  
12  
13  
14  
15  
16  
17 It is unclear whether physical activity has direct or indirect effects on 25-OHD levels.  
18 Sun exposure is the major determinant of circulating 25-OHD levels, hence, it is  
19 possible that physical activity may indirectly impact 25-OHD levels through increased  
20 sun exposure associated with outdoor activity<sup>7</sup> among active individuals; yet few studies  
21 have measured activities specifically to outdoor, or able to adjusted for sun exposure.<sup>16</sup>  
22  
23  
24  
25  
26  
27  
28  
29  
30  
31  
32  
33  
34  
35  
36  
37  
38  
39  
40  
41  
42  
43  
44  
45  
46  
47  
48  
49  
50  
51  
52  
53  
54  
55  
56  
57  
58  
59  
60

<sup>17 35 36</sup> On the other hand, physical activity may directly impact 25-OHD metabolism.  
Zittermann and colleagues<sup>18</sup> reported higher calcium absorption rates and plasma  
calcritrol levels in exercise-trained young men compared to age-matched sedentary  
controls. Similarly, in a small study, young males who underwent muscle-building  
exercise (indoor) for at least 1 year had higher circulating 25-OHD, Gla-protein, and  
1,25-dihydroxyvitamin levels compared to age-matched controls who received constant  
daily diet same as the exercise group.<sup>20</sup> However, whether this mechanism operates in  
cancer survivors is unclear, because of the physiological, biological and behavioral  
alterations associated with cancer, and cancer treatment.<sup>32</sup>

We observed statistically significant higher circulating 25-OHD levels associated with  
outdoor, but not with indoor, LTPA in the mutually adjusted model. Nevertheless, no

1  
2  
3 statistically significant interaction between indoor and outdoor LTPA was observed. It is  
4 likely that LTPA influence 25-OHD via multiple pathways, possibly both an indirect effect  
5 due to sun exposure and a direct impact on 25-OHD metabolism. However this warrants  
6 further investigation using precise measures of physical activity<sup>37</sup> and taking into  
7 consideration sun exposure, and other vitamin D metabolites.  
8  
9

10  
11 We observed that obese cancer survivors who were active had higher circulating 25-  
12 OHD levels. Obesity is believed to induce low circulating 25-OHD levels through  
13 volumetric dilution of vitamin D in the excessive adipose tissue.<sup>38</sup> Given that obese  
14 cancer survivors are at higher risk of vitamin D deficiency compared to the non-obese,<sup>39</sup>  
15  
16  
17  
18  
19  
20  
21  
22  
23  
24  
25  
26  
27  
28  
29  
30  
31  
32  
33  
34  
35  
36  
37  
38  
39  
40  
41  
42  
43  
44  
45  
46  
47  
48  
49  
50  
51  
52  
53  
54  
55  
56  
57  
58  
59  
60

<sup>40</sup> present findings suggested engaging in physical activity might be particularly important to maintain or increase circulating 25-OHD levels among obese cancer survivors. Future studies are needed to confirm these findings using more precise measures of adiposity (e.g., body fat percentage) in a larger study population.

The association between LTPA and dietary vitamin D supplement use appeared to differ between 2001-2006 data ( $p=0.19$ ) and 2007-2010 ( $p=0.03$ ) data, although the prevalence of dietary vitamin D supplement use were similar in two study phases (51.4% vs. 51.5%). In the 2007-2010 data, active cancer survivors are more likely to report dietary vitamin D supplement use compared to inactive ones. Thus, the non-significant findings of LTPA and circulating 25-OHD levels could arise from the change in self-reported LTPA measures from 2001-2006 to 2007-2010 data.

1  
2  
3 The main strength of this analysis is pooling cancer survivors from a nationally  
4 representative adult sample in the US. We aggregated five waves' data and achieved a  
5 fairly sizeable sample. In addition, we controlled for a range of factors that are known to  
6 affect the circulating 25-OHD levels. Further, we were able to compare associations of  
7 LTPA with 25-OHD by outdoor and indoor LTPA, thereby providing further insights on  
8 the associations of LTPA with 25-OHD levels.  
9  
10  
11  
12  
13  
14  
15  
16  
17  
18  
19

20 There are a number of limitations to this study. First, the cross-sectional nature of this  
21 study makes it impossible to determine a causal association. The debate on whether  
22 vitamin D deficiency is a risk factor for mortality or an indicator of good health is  
23 ongoing.<sup>41 42</sup> It is possible that active cancer survivors were more active because of  
24 better health status, than those who were inactive. Thus, the higher 25-OHD levels in  
25 active cancer survivors might be an indicator of better overall health. Second, season,  
26 an important determinant of 25-OHD levels, was only available in two categories. Solar  
27 radiation, required for skin to synthesize vitamin D, is weaker in winter compared to  
28 summer. However, there were no statistically significant differences between winter  
29 (Southern states) and summer (Northern states) 25-OHD levels in our study population,  
30 probably owing to the timing of blood collection in each region. The NHANES study  
31 collected blood samples in the Southern states during winter, and in the Northern states  
32 during summer. Third, we were not able to conduct analyses stratified by cancer type or  
33 time since diagnosis because of the limited number of individual cancers. Finally,  
34 physical activity was self-reported. Participants who received chemotherapy within last 4  
35 weeks were excluded from blood collection within the NHANES study. Chemotherapy  
36  
37  
38  
39  
40  
41  
42  
43  
44  
45  
46  
47  
48  
49  
50  
51  
52  
53  
54  
55  
56  
57  
58  
59  
60

1  
2  
3 associated reduction of circulating 25-OHD level has been documented previously.<sup>43-45</sup>  
4  
5 Therefore our findings might not be generalizable to patients receiving chemotherapy.  
6  
7  
8  
9

10 Our findings of an association between LTPA and 25-OHD, that was stronger for  
11 outdoor LTPA compared to indoor LTPA has implications for public health  
12 recommendations in cancer survivors. Although the casual relationship of 25-OHD with  
13 cancer survival is yet unclear, strong evidence supports the benefits of physical activity  
14 in improved cancer survival and the quality of life during survival.<sup>37 46</sup> Our findings  
15 suggest that 25-OHD might be a surrogate marker of physical activity that accounts for  
16 the direct and indirect effects of LTPA, particularly outdoor.<sup>7 16</sup> The proportion of cancer  
17 survivors in NHANES who did not engage in any LTPA was high, especially in the 2007-  
18 2010 (53.3%) compared to the 2001-2006 wave (38.3%). This observed decline in  
19 LTPA might be attributed to the differences in measures and may not reflect an actual  
20 change in LTPA levels, i.e. the 2001-2006 measure is comprised of 48 activity items  
21 whilst the 2007-2010 measure queries general physical activity participation. This  
22 differences in measures may also contribute to the non-significant findings observed in  
23 the 2007-2010 data. In fact, an increase in the physical activity level in the US  
24 population from 2001 to 2011 has been reported from the BRFSS data,<sup>47</sup> though this  
25 trend may not hold true in cancer survivors. Guidelines from the American Cancer  
26 Society<sup>32</sup> and American College of Sports Medicine<sup>48</sup> suggest that cancer survivors  
27 should follow the physical activity guidelines for Americans with specific exercise  
28 programming adaptations based on disease- and treatment-related adverse effects.  
29 However, physical activity levels in these populations are critically low during and after  
30  
31  
32  
33  
34  
35  
36  
37  
38  
39  
40  
41  
42  
43  
44  
45  
46  
47  
48  
49  
50  
51  
52  
53  
54  
55  
56  
57  
58  
59  
60

1  
2  
3 treatment.<sup>49</sup> Physical activity interventions in cancer survivors may consider including  
4  
5 early morning (before 11 am) outdoor activities for about 15 minutes. Notably, given the  
6  
7 well-documented differences in cancer prognosis between non-Hispanic Blacks and  
8  
9 other racial/ethnic groups, and the emerging associations of vitamin D with cancer  
10  
11 prognosis, physical activity interventions incorporating outdoor activities might be  
12  
13 particularly important for cancer survival among non-Hispanic Blacks.  
14  
15  
16  
17  
18  
19

20 In conclusion, physical activity, particularly outdoor physical activity is associated with  
21  
22 higher 25-OHD levels in cancer survivors. This adds to the potential health benefits of  
23  
24 being physically active. Non-Hispanic Black cancer survivors, who are more likely to  
25  
26 have vitamin D deficiency, were less likely to engage in outdoor LTPA. In view of the  
27  
28 possible beneficial effects of vitamin D on cancer prognosis, engaging in outdoor  
29  
30 physical activity could provide clinically meaningful increases in 25-OHD levels among  
31  
32 cancer survivors.  
33  
34  
35  
36  
37  
38  
39  
40  
41  
42  
43  
44  
45  
46  
47  
48  
49  
50  
51  
52  
53  
54  
55  
56  
57  
58  
59  
60

1  
2  
3 **Funding:** This work was supported by the Transdisciplinary Research on Energetics and  
4 Cancer (TREC) Center at Washington University in St. Louis (LY) and the Alvin J.  
5 Siteman Cancer Center, Barnes-Jewish Hospital Foundation, and Washington  
6 University School of Medicine (ATT). The TREC Center is funded by the National  
7 Cancer Institute at NIH (U54 CA155496).  
8  
9

10  
11  
12  
13  
14  
15  
16  
17 **Competing interests:** None declared.  
18  
19

20  
21  
22 **Ethics approval:** National Center for Health Statistics Research Ethics Review Board  
23 Approval.  
24  
25  
26

27  
28  
29 **Contributors:** LY and ATT conceived and designed study, analysed and interpreted  
30 data, drafted and reviewed manuscript.  
31  
32  
33

34  
35  
36 **Data sharing statement:** The NHNAES data are publically available at  
37 <https://wwwn.cdc.gov/nchs/nhanes/Default.aspx>.  
38  
39  
40  
41  
42  
43  
44  
45  
46  
47  
48  
49  
50  
51  
52  
53  
54  
55  
56  
57  
58  
59  
60

## REFERENCES

1. Miller KD, Siegel RL, Lin CC, et al. Cancer treatment and survivorship statistics, 2016. *CA: a cancer journal for clinicians* 2016;**66**(4):271-89.
2. Toriola AT, Nguyen N, Scheitler-Ring K, et al. Circulating 25-hydroxyvitamin D levels and prognosis among cancer patients: a systematic review. *Cancer epidemiology, biomarkers & prevention : a publication of the American Association for Cancer Research, cosponsored by the American Society of Preventive Oncology* 2014;**23**(6):917-33.
3. Yao S, Kwan ML, Ergas IJ, et al. Association of Serum Level of Vitamin D at Diagnosis With Breast Cancer Survival: A Case-Cohort Analysis in the Pathways Study. *JAMA oncology* 2016.
4. Mondul AM, Weinstein SJ, Moy KA, et al. Circulating 25-Hydroxyvitamin D and Prostate Cancer Survival. *Cancer epidemiology, biomarkers & prevention : a publication of the American Association for Cancer Research, cosponsored by the American Society of Preventive Oncology* 2016;**25**(4):665-9.
5. Webb PM, de Fazio A, Protani MM, et al. Circulating 25-hydroxyvitamin D and survival in women with ovarian cancer. *The American journal of clinical nutrition* 2015;**102**(1):109-14.
6. Heaney RP. Serum 25-hydroxyvitamin D is a reliable indicator of vitamin D status. *The American journal of clinical nutrition* 2011;**94**(2):619-20; author reply 20.
7. Holick MF. Vitamin D deficiency. *The New England journal of medicine* 2007;**357**(3):266-81.
8. Holick MF, Binkley NC, Bischoff-Ferrari HA, et al. Evaluation, treatment, and prevention of vitamin D deficiency: an Endocrine Society clinical practice guideline. *The Journal of clinical endocrinology and metabolism* 2011;**96**(7):1911-30.
9. Sowers MR, Wallace RB, Hollis BW, et al. Parameters related to 25-OH-D levels in a population-based study of women. *The American journal of clinical nutrition* 1986;**43**(4):621-8.
10. Ulrich CM, Holmes RS. Shedding light on colorectal cancer prognosis: vitamin d and beyond. *Journal of clinical oncology : official journal of the American Society of Clinical Oncology* 2008;**26**(18):2937-9.
11. Autier P, Boniol M, Pizot C, et al. Vitamin D status and ill health: a systematic review. *The lancet Diabetes & endocrinology* 2014;**2**(1):76-89.
12. Ballard-Barbash R, Friedenreich CM, Courneya KS, et al. Physical activity, biomarkers, and disease outcomes in cancer survivors: a systematic review. *Journal of the National Cancer Institute* 2012;**104**(11):815-40.
13. Schmid D, Leitzmann MF. Association between physical activity and mortality among breast cancer and colorectal cancer survivors: a systematic review and meta-analysis. *Annals of oncology : official journal of the European Society for Medical Oncology* 2014;**25**(7):1293-311.
14. Arem H, Moore SC, Park Y, et al. Physical activity and cancer-specific mortality in the NIH-AARP Diet and Health Study cohort. *International journal of cancer* 2014;**135**(2):423-31.
15. Brock K, Huang WY, Fraser DR, et al. Low vitamin D status is associated with physical inactivity, obesity and low vitamin D intake in a large US sample of healthy middle-aged men and women. *The Journal of steroid biochemistry and molecular biology* 2010;**121**(1-2):462-6.

16. Scragg R, Camargo CA, Jr. Frequency of leisure-time physical activity and serum 25-hydroxyvitamin D levels in the US population: results from the Third National Health and Nutrition Examination Survey. *American journal of epidemiology* 2008;**168**(6):577-86; discussion 87-91.
17. Wannier M, Richard A, Martin B, et al. Associations between objective and self-reported physical activity and vitamin D serum levels in the US population. *Cancer causes & control* : CCC 2015;**26**(6):881-91.
18. Zittermann A, Sabatschus O, Jantzen S, et al. Exercise-trained young men have higher calcium absorption rates and plasma calcitriol levels compared with age-matched sedentary controls. *Calcified tissue international* 2000;**67**(3):215-9.
19. Yeh JK, Aloia JF, Yasumura S. Effect of physical activity on calcium and phosphorus metabolism in the rat. *The American journal of physiology* 1989;**256**(1 Pt 1):E1-6.
20. Bell NH, Godsen RN, Henry DP, et al. The effects of muscle-building exercise on vitamin D and mineral metabolism. *Journal of bone and mineral research* : the official journal of the American Society for Bone and Mineral Research 1988;**3**(4):369-73.
21. Klausen T, Breum L, Sorensen HA, et al. Plasma levels of parathyroid hormone, vitamin D, calcitonin, and calcium in association with endurance exercise. *Calcified tissue international* 1993;**52**(3):205-8.
22. Teleni L, Baker J, Koczwara B, et al. Clinical outcomes of vitamin D deficiency and supplementation in cancer patients. *Nutrition reviews* 2013;**71**(9):611-21.
23. Churilla TM, Lesko SL, Brereton HD, et al. Serum vitamin D levels among patients in a clinical oncology practice compared to primary care patients in the same community: a case-control study. *BMJ open* 2011;**1**(2):e000397.
24. Centers for Disease Control and Prevention. National Health and Nutrition Examination Survey. <http://www.cdc.gov/nchs/nhanes.htm>. Accessed June 21, 2016.
25. Centers for Disease Control and Prevention. NHANES Laboratory/Medical Technologists Procedures Manual -[https://www.cdc.gov/nchs/data/nhanes/nhanes\\_09\\_10/lab.pdf](https://www.cdc.gov/nchs/data/nhanes/nhanes_09_10/lab.pdf), Accessed June 21, 2016. 2009.
26. Centers for Disease Control and Prevention. Analytical Note for 25-Hydroxyvitamin D Data Analysis using NHANES III (1988-1994), NHANES 2001-2006, and NHANES 2007-2010 - <http://www.cdc.gov/nchs/nhanes/VitaminDAnalyticalNote.aspx>, Accessed June 21, 2016. 2015.
27. Dwyer JT, Picciano MF, Betz JM, et al. Progress in development of an integrated dietary supplement ingredient database at the NIH Office of Dietary Supplements. *Journal of food composition and analysis* : an official publication of the United Nations University, International Network of Food Data Systems 2006;**19**:S108-s14.
28. Ainsworth BE, Haskell WL, Herrmann SD, et al. 2011 Compendium of Physical Activities: a second update of codes and MET values. *Medicine and science in sports and exercise* 2011;**43**(8):1575-81.
29. Navaneethan SD, Kirwan JP, Arrigain S, et al. Overweight, obesity and intentional weight loss in chronic kidney disease: NHANES 1999-2006. *International journal of obesity* (2005) 2012;**36**(12):1585-90.
30. Hallal PC, Andersen LB, Bull FC, et al. Global physical activity levels: surveillance progress, pitfalls, and prospects. *Lancet (London, England)* 2012;**380**(9838):247-57.



- 1
  - 2
  - 3
  - 4
  - 5
  - 6
  - 7
  - 8
  - 9
  - 10
  - 11
  - 12
  - 13
  - 14
  - 15
  - 16
  - 17
  - 18
  - 19
  - 20
  - 21
  - 22
  - 23
  - 24
  - 25
  - 26
  - 27
  - 28
  - 29
  - 30
  - 31
  - 32
  - 33
  - 34
  - 35
  - 36
  - 37
  - 38
  - 39
  - 40
  - 41
  - 42
  - 43
  - 44
  - 45
  - 46
  - 47
  - 48
  - 49
  - 50
  - 51
  - 52
  - 53
  - 54
  - 55
  - 56
  - 57
  - 58
  - 59
  - 60
31. Zhao G, Li C, Ford ES, et al. Leisure-time aerobic physical activity, muscle-strengthening activity and mortality risks among US adults: the NHANES linked mortality study. *British journal of sports medicine* 2014;**48**(3):244-9.
32. Rock CL, Doyle C, Demark-Wahnefried W, et al. Nutrition and physical activity guidelines for cancer survivors. *CA: a cancer journal for clinicians* 2012;**62**(4):243-74.
33. Zhang J, Yu KF. What's the relative risk? A method of correcting the odds ratio in cohort studies of common outcomes. *Jama* 1998;**280**(19):1690-1.
34. Seamans KM, Cashman KD. Existing and potentially novel functional markers of vitamin D status: a systematic review. *The American journal of clinical nutrition* 2009;**89**(6):1997s-2008s.
35. Scragg R, Holdaway I, Singh V, et al. Serum 25-hydroxyvitamin D3 is related to physical activity and ethnicity but not obesity in a multicultural workforce. *Australian and New Zealand journal of medicine* 1995;**25**(3):218-23.
36. Florez H, Martinez R, Chacra W, et al. Outdoor exercise reduces the risk of hypovitaminosis D in the obese. *The Journal of steroid biochemistry and molecular biology* 2007;**103**(3-5):679-81.
37. Skender S, Schrotz-King P, Bohm J, et al. Repeat physical activity measurement by accelerometry among colorectal cancer patients--feasibility and minimal number of days of monitoring. *BMC research notes* 2015;**8**:222.
38. Drincic AT, Armas LA, Van Diest EE, et al. Volumetric dilution, rather than sequestration best explains the low vitamin D status of obesity. *Obesity (Silver Spring, Md)* 2012;**20**(7):1444-8.
39. Friedman CF, DeMichele A, Su HI, et al. Vitamin d deficiency in postmenopausal breast cancer survivors. *Journal of women's health (2002)* 2012;**21**(4):456-62.
40. Vashi PG, Lammersfeld CA, Braun DP, et al. Serum 25-hydroxyvitamin D is inversely associated with body mass index in cancer. *Nutrition journal* 2011;**10**:51.
41. Schottker B, Jorde R, Peasey A, et al. Vitamin D and mortality: meta-analysis of individual participant data from a large consortium of cohort studies from Europe and the United States. *BMJ (Clinical research ed)* 2014;**348**:g3656.
42. Chowdhury R, Kunutsor S, Vitezova A, et al. Vitamin D and risk of cause specific death: systematic review and meta-analysis of observational cohort and randomised intervention studies. *BMJ (Clinical research ed)* 2014;**348**:g1903.
43. Fakih MG, Trump DL, Johnson CS, et al. Chemotherapy is linked to severe vitamin D deficiency in patients with colorectal cancer. *International journal of colorectal disease* 2009;**24**(2):219-24.
44. Fakih MG, Andrews C, McMahon J, et al. A prospective clinical trial of cholecalciferol 2000 IU/day in colorectal cancer patients: evidence of a chemotherapy-response interaction. *Anticancer research* 2012;**32**(4):1333-8.
45. Jacot W, Poudroux S, Thezenas S, et al. Increased prevalence of vitamin D insufficiency in patients with breast cancer after neoadjuvant chemotherapy. *Breast cancer research and treatment* 2012;**134**(2):709-17.
46. Strasser B, Steindorf K, Wiskemann J, et al. Impact of resistance training in cancer survivors: a meta-analysis. *Medicine and science in sports and exercise* 2013;**45**(11):2080-90.
47. Dwyer-Lindgren L, Freedman G, Engell RE, et al. Prevalence of physical activity and obesity in US counties, 2001-2011: a road map for action. *Population health metrics* 2013;**11**:7.

- 1  
2  
3 48. Schmitz KH, Courneya KS, Matthews C, et al. American College of Sports Medicine  
4 roundtable on exercise guidelines for cancer survivors. *Medicine and science in sports*  
5 and exercise 2010;**42**(7):1409-26.  
6  
7 49. Huy C, Schmidt ME, Vrieling A, et al. Physical activity in a German breast cancer patient  
8 cohort: one-year trends and characteristics associated with change in activity level.  
9 *European journal of cancer (Oxford, England : 1990)* 2012;**48**(3):297-304.  
10  
11  
12  
13  
14  
15  
16  
17  
18  
19  
20  
21  
22  
23  
24  
25  
26  
27  
28  
29  
30  
31  
32  
33  
34  
35  
36  
37  
38  
39  
40  
41  
42  
43  
44  
45  
46  
47  
48  
49  
50  
51  
52  
53  
54  
55  
56  
57  
58  
59  
60

For peer review only

Table 1. Socio-demographic Characteristics and Leisure Time Physical Activity of Cancer Survivors Aged 20 years or Older from the NHANES (2001 - 2006), by Circulating 25-OHD levels (n=793)

|                                       | N           | Circulating 25-OHD (nmol/L) |                          |                           |                           |                         | P-value    |                        |
|---------------------------------------|-------------|-----------------------------|--------------------------|---------------------------|---------------------------|-------------------------|------------|------------------------|
|                                       |             | Overall                     | Quintile 1<br>(9.1-44.7) | Quintile 2<br>(45.9-56.8) | Quintile 3<br>(58.1-66.8) | Quintile 4<br>(68-80.3) |            | Quintile 5<br>(81-156) |
| 2001-2006                             | 793         | 793                         | 208                      | 160                       | 143                       | 153                     | 129        |                        |
| Age (year)                            | Mean (s.e.) | 60.3 (0.6)                  | 60.1 (1.5)               | 59.4 (1.8)                | 61.0 (1.6)                | 61.9 (1.4)              | 57.6 (1.6) | 0.36                   |
| BMI                                   |             |                             |                          |                           |                           |                         |            | <.001                  |
| <18.5                                 | %           | 1.9                         | 1.9                      | 0.2                       | 1.8                       | 2.6                     | 3.4        |                        |
| 18.5 – 24.9                           | %           | 32.7                        | 29.3                     | 19.4                      | 33.8                      | 35.5                    | 47.1       |                        |
| 25.0 – 29.9                           | %           | 32.1                        | 23.2                     | 36.1                      | 38.4                      | 31.2                    | 32.1       |                        |
| ≥ 30                                  | %           | 33.3                        | 45.6                     | 44.3                      | 26.0                      | 30.7                    | 17.4       |                        |
| Season                                |             |                             |                          |                           |                           |                         |            | 0.12                   |
| Winter (November to April)            | %           | 34.3                        | 43.2                     | 38.8                      | 31.0                      | 26.1                    | 31.5       |                        |
| Summer (May to October)               | %           | 65.7                        | 56.8                     | 61.2                      | 69.0                      | 73.9                    | 68.5       |                        |
| Sex                                   |             |                             |                          |                           |                           |                         |            | 0.52                   |
| Male                                  | %           | 32.7                        | 29.2                     | 32.5                      | 33.3                      | 39.4                    | 38.6       |                        |
| Female                                | %           | 67.3                        | 70.8                     | 67.5                      | 66.7                      | 60.6                    | 70.4       |                        |
| Race                                  |             |                             |                          |                           |                           |                         |            | <.001                  |
| Non-Hispanic white                    | %           | 86.1                        | 72.1                     | 81.9                      | 90.9                      | 93.8                    | 93.6       |                        |
| Non-Hispanic black                    | %           | 6.6                         | 18.7                     | 6.3                       | 2.3                       | 1.7                     | 2.8        |                        |
| Hispanic and other                    | %           | 7.3                         | 9.2                      | 11.8                      | 6.8                       | 4.5                     | 3.6        |                        |
| Smoking                               |             |                             |                          |                           |                           |                         |            | 0.06                   |
| Never smoked                          | %           | 39.1                        | 32.5                     | 42.7                      | 48.7                      | 36.1                    | 36.3       |                        |
| Former smoker                         | %           | 39.8                        | 37.5                     | 34.5                      | 40.5                      | 46.4                    | 40.4       |                        |
| Current smoker                        | %           | 21.1                        | 30.0                     | 22.8                      | 10.8                      | 17.5                    | 23.3       |                        |
| Vitamin D supplement use              |             |                             |                          |                           |                           |                         |            | <.001                  |
| No                                    | %           | 48.6                        | 75.8                     | 52.7                      | 34.8                      | 42.5                    | 34.3       |                        |
| Yes                                   | %           | 51.4                        | 24.2                     | 47.3                      | 65.3                      | 57.5                    | 65.7       |                        |
| Leisure time physical activity (LTPA) |             |                             |                          |                           |                           |                         |            | 0.001                  |

|    |                       |   |      |      |      |      |      |      |       |
|----|-----------------------|---|------|------|------|------|------|------|-------|
| 1  |                       |   |      |      |      |      |      |      |       |
| 2  |                       |   |      |      |      |      |      |      |       |
| 3  |                       |   |      |      |      |      |      |      |       |
| 4  | Inactive              | % | 38.2 | 55.5 | 40.7 | 36.6 | 30.8 | 26.1 |       |
| 5  | Insufficiently Active | % | 33.0 | 27.4 | 35.4 | 29.1 | 39.8 | 33.0 |       |
| 6  | Sufficiently Active   | % | 28.8 | 17.1 | 23.9 | 34.3 | 29.4 | 40.9 |       |
| 7  | Indoor LTPA           |   |      |      |      |      |      |      | 0.08  |
| 8  | Inactive              | % | 61.7 | 70.3 | 67.4 | 53.8 | 61.2 | 54.2 |       |
| 9  | Insufficiently Active | % | 18.2 | 15.3 | 20.1 | 21.5 | 17.4 | 16.7 |       |
| 10 | Sufficiently Active   | % | 20.1 | 14.4 | 12.5 | 24.7 | 21.4 | 29.1 |       |
| 11 | Outdoor LTPA          |   |      |      |      |      |      |      | <.001 |
| 12 | Inactive              | % | 52.0 | 72.3 | 51.2 | 54.7 | 39.4 | 41.5 |       |
| 13 | Insufficiently Active | % | 22.0 | 12.9 | 24.1 | 15.8 | 29.9 | 27.5 |       |
| 14 | Sufficiently Active   | % | 26.0 | 14.8 | 24.7 | 29.5 | 30.7 | 31.0 |       |
| 15 |                       |   |      |      |      |      |      |      |       |
| 16 |                       |   |      |      |      |      |      |      |       |
| 17 |                       |   |      |      |      |      |      |      |       |
| 18 |                       |   |      |      |      |      |      |      |       |
| 19 |                       |   |      |      |      |      |      |      |       |
| 20 |                       |   |      |      |      |      |      |      |       |
| 21 |                       |   |      |      |      |      |      |      |       |
| 22 |                       |   |      |      |      |      |      |      |       |
| 23 |                       |   |      |      |      |      |      |      |       |
| 24 |                       |   |      |      |      |      |      |      |       |
| 25 |                       |   |      |      |      |      |      |      |       |
| 26 |                       |   |      |      |      |      |      |      |       |
| 27 |                       |   |      |      |      |      |      |      |       |
| 28 |                       |   |      |      |      |      |      |      |       |
| 29 |                       |   |      |      |      |      |      |      |       |
| 30 |                       |   |      |      |      |      |      |      |       |
| 31 |                       |   |      |      |      |      |      |      |       |
| 32 |                       |   |      |      |      |      |      |      |       |
| 33 |                       |   |      |      |      |      |      |      |       |
| 34 |                       |   |      |      |      |      |      |      |       |
| 35 |                       |   |      |      |      |      |      |      |       |
| 36 |                       |   |      |      |      |      |      |      |       |
| 37 |                       |   |      |      |      |      |      |      |       |
| 38 |                       |   |      |      |      |      |      |      |       |
| 39 |                       |   |      |      |      |      |      |      |       |
| 40 |                       |   |      |      |      |      |      |      |       |
| 41 |                       |   |      |      |      |      |      |      |       |
| 42 |                       |   |      |      |      |      |      |      |       |
| 43 |                       |   |      |      |      |      |      |      |       |
| 44 |                       |   |      |      |      |      |      |      |       |
| 45 |                       |   |      |      |      |      |      |      |       |
| 46 |                       |   |      |      |      |      |      |      |       |
| 47 |                       |   |      |      |      |      |      |      |       |
| 48 |                       |   |      |      |      |      |      |      |       |
| 49 |                       |   |      |      |      |      |      |      |       |

For peer review only

Table 2. Socio-demographic Characteristics and Leisure Time Physical Activity of Cancer Survivors Aged 20 years or Older from the NHANES (2007- 2010), by Circulating 25-OHD level (n=737)

|                                       | N           | Circulating 25-OHD (nmol/L) |                           |                           |                           |                           | P-value    |                          |
|---------------------------------------|-------------|-----------------------------|---------------------------|---------------------------|---------------------------|---------------------------|------------|--------------------------|
|                                       |             | Overall                     | Quintile 1<br>(13.2-49.2) | Quintile 2<br>(49.3-63.9) | Quintile 3<br>(64.3-76.5) | Quintile 4<br>(76.6-93.4) |            | Quintile 5<br>(93.9-206) |
| 2007-2010                             | 737         | 737                         | 194                       | 153                       | 139                       | 143                       | 108        |                          |
| Age (year)                            | Mean (s.e.) | 60.8 (0.7)                  | 58.9 (1.3)                | 59.8 (1.1)                | 61.7 (1.4)                | 64.3 (1.5)                | 59.3 (2.0) | 0.35                     |
| BMI                                   |             |                             |                           |                           |                           |                           |            | 0.008                    |
| <18.5                                 | %           | 2.0                         | 2.2                       | 0.6                       | 1.5                       | 1.8                       | 3.9        |                          |
| 18.5 – 24.9                           | %           | 27.2                        | 23.1                      | 20.3                      | 21.2                      | 36.7                      | 34.6       |                          |
| 25.0 – 29.9                           | %           | 34.0                        | 24.7                      | 45.5                      | 34.1                      | 30.4                      | 35.6       |                          |
| ≥ 30                                  | %           | 36.8                        | 50.0                      | 33.6                      | 43.2                      | 31.1                      | 25.9       |                          |
| Season                                |             |                             |                           |                           |                           |                           |            | 0.1                      |
| Winter (November to April)            | %           | 32.6                        | 39.7                      | 32.7                      | 34.2                      | 22.4                      | 33.9       |                          |
| Summer (May to October)               | %           | 67.4                        | 60.3                      | 67.3                      | 65.8                      | 77.6                      | 66.1       |                          |
| Sex                                   |             |                             |                           |                           |                           |                           |            | 0.40                     |
| Male                                  | %           | 37.8                        | 29.3                      | 42.8                      | 41.2                      | 39.9                      | 36.2       |                          |
| Female                                | %           | 62.2                        | 70.7                      | 57.2                      | 58.8                      | 60.1                      | 63.8       |                          |
| Race                                  |             |                             |                           |                           |                           |                           |            | <.001                    |
| Non-Hispanic white                    | %           | 82.6                        | 57.3                      | 81.9                      | 88.8                      | 91.5                      | 94.1       |                          |
| Non-Hispanic black                    | %           | 8.2                         | 20.9                      | 7.5                       | 5.3                       | 4.9                       | 2.2        |                          |
| Hispanic and other                    | %           | 9.2                         | 21.8                      | 10.6                      | 5.9                       | 3.6                       | 3.7        |                          |
| Smoking                               |             |                             |                           |                           |                           |                           |            | 0.03                     |
| Never smoked                          | %           | 47.5                        | 48.5                      | 55.1                      | 48.9                      | 43.1                      | 43.8       |                          |
| Former smoker                         | %           | 35.1                        | 26.2                      | 25.8                      | 43.3                      | 43.0                      | 37.2       |                          |
| Current smoker                        | %           | 17.4                        | 25.3                      | 19.1                      | 9.8                       | 13.9                      | 19.0       |                          |
| Vitamin D supplement use              |             |                             |                           |                           |                           |                           |            | <.001                    |
| No                                    | %           | 48.5                        | 81.8                      | 61.1                      | 46.1                      | 32.8                      | 20.0       |                          |
| Yes                                   | %           | 51.5                        | 18.2                      | 38.9                      | 53.9                      | 67.2                      | 80.0       |                          |
| Leisure time physical activity (LTPA) |             |                             |                           |                           |                           |                           |            | 0.04                     |

1  
2  
3  
4  
5  
6  
7  
8  
9  
10  
11  
12  
13  
14  
15  
16  
17  
18  
19  
20  
21  
22  
23  
24  
25  
26  
27  
28  
29  
30  
31  
32  
33  
34  
35  
36  
37  
38  
39  
40  
41  
42  
43  
44  
45  
46  
47  
48  
49

|                       |   |      |      |      |      |      |      |
|-----------------------|---|------|------|------|------|------|------|
| Inactive              | % | 53.3 | 70.8 | 51.7 | 51.3 | 50.9 | 41.6 |
| Insufficiently Active | % | 16.6 | 12.6 | 20.8 | 15.7 | 14.3 | 19.8 |
| Sufficiently Active   | % | 30.1 | 16.6 | 27.5 | 33.0 | 34.8 | 38.6 |

---

For peer review only

Table 3. Associations between Leisure-Time Physical Activity and Circulating 25-OHD level from Unadjusted and Multivariable Linear Regression models among Cancer Survivors Aged 20 years or Older from the NHANES (2001 - 2010).

| 2001-2006* (n=793)                    |                       | Circulating 25-OHD (nmol/L)             |                                         |
|---------------------------------------|-----------------------|-----------------------------------------|-----------------------------------------|
|                                       |                       | Unadjusted<br>Beta-coefficient (95% CI) | Adjusted †<br>Beta-coefficient (95% CI) |
| Leisure time physical activity (LTPA) |                       |                                         |                                         |
|                                       | Inactive              | reference                               | reference                               |
|                                       | Insufficiently Active | 7.36 (2.65 to 12.07)                    | 3.63 (-0.69 to 7.95)                    |
|                                       | Sufficiently Active   | 12.16 (7.29 to 17.04)                   | 8.07 (4.63 to 11.52)                    |
|                                       | P for trend           | <.001                                   | <.001                                   |
| Outdoor physical activity             |                       |                                         |                                         |
|                                       | Inactive              | reference                               | reference                               |
|                                       | Insufficiently Active | 9.10 (5.15 to 13.04)                    | 6.17 (1.74 to 10.59)                    |
|                                       | Sufficiently Active   | 8.84 (4.16 to 13.52)                    | 5.83 (1.64 to 10.01)                    |
|                                       | P for trend           | <.001                                   | 0.005                                   |
| Indoor physical activity              |                       |                                         |                                         |
|                                       | Inactive              | reference                               | reference                               |
|                                       | Insufficiently Active | 3.15 (-1.63 to 7.94)                    | -1.22 (-4.97 to 2.52)                   |
|                                       | Sufficiently Active   | 8.22 (2.50 to 13.93)                    | 2.93 (-1.80 to 7.66)                    |
|                                       | P for trend           | 0.004                                   | 0.23                                    |
| 2007-2010* (n=737)                    |                       | Circulating 25-OHD (nmol/L)             |                                         |
|                                       |                       | Unadjusted<br>Beta-coefficient (95% CI) | Adjusted †<br>Beta-coefficient (95% CI) |
| Leisure time physical activity (LTPA) |                       |                                         |                                         |
|                                       | Inactive              | reference                               | reference                               |
|                                       | Insufficiently Active | 8.80 (-2.67 to 20.26)                   | 5.70 (-4.19 to 15.6)                    |
|                                       | Sufficiently Active   | 12.04 (5.24 to 18.84)                   | 5.73 (-1.68 to 13.15)                   |
|                                       | P for trend           | 0.001                                   | 0.11                                    |

\*Leisure-time physical activity (LTPA) data analyzed separately due to the changes in self-reported LTPA measures from wave 2005 - 2006 to 2007-2008.

†Adjusted for age, sex, race, body mass index, smoking status and dietary vitamin D supplement use.

Table 4. Associations between Leisure-Time Physical Activity and Circulating 25-OHD level from Unadjusted and Adjusted Logistic Regression models among Cancer Survivors Aged 20 years or Older from the NHANES (2001 - 2010).

| 2001-2006*                            |  | Circulating 25-OHD >=50 nmol/L (n=534) |                             |
|---------------------------------------|--|----------------------------------------|-----------------------------|
| Reference:                            |  | Unadjusted                             | Adjusted†                   |
| Circulating 25-OHD <50 nmol/L (n=259) |  | Prevalence ratio (95% CI) †            | Prevalence ratio (95% CI) † |
| Leisure time physical activity (LTPA) |  |                                        |                             |
| Inactive                              |  | reference                              | reference                   |
| Insufficiently Active                 |  | 1.19 (1.02 to 1.33)                    | 1.10 (0.88 to 1.27)         |
| Sufficiently Active                   |  | 1.36 (1.30 to 1.45)                    | 1.32 (1.19 to 1.41)         |
| P for trend                           |  | <.001                                  | <.001                       |
| Outdoor physical activity             |  |                                        |                             |
| Inactive                              |  | reference                              | reference                   |
| Insufficiently Active                 |  | 1.21 (1.10 to 1.30)                    | 1.16 (1.01 to 1.27)         |
| Sufficiently Active                   |  | 1.24 (1.11 to 1.33)                    | 1.22 (1.06 to 1.32)         |
| P for trend                           |  | 0.001                                  | 0.009                       |
| Indoor physical activity              |  |                                        |                             |
| Inactive                              |  | reference                              | reference                   |
| Insufficiently Active                 |  | 1.19 (0.99 to 1.33)                    | 1.10 (0.87 to 1.27)         |
| Sufficiently Active                   |  | 1.21 (1.05 to 1.33)                    | 1.07 (0.88 to 1.23)         |
| P for trend                           |  | 0.006                                  | 0.32                        |
| 2007-2010*                            |  | Circulating 25-OHD >=50 nmol/L (n=531) |                             |
| Reference                             |  | Unadjusted                             | Adjusted †                  |
| Circulating 25-OHD <50 nmol/L (n=206) |  | Prevalence ratio (95% CI)              | Prevalence ratio (95% CI)   |
| Leisure time physical activity (LTPA) |  |                                        |                             |
| Inactive                              |  | reference                              | reference                   |
| Insufficiently Active                 |  | 1.15 (0.97 to 1.26)                    | 1.14 (0.92 to 1.27)         |
| Sufficiently Active                   |  | 1.22 (1.07 to 1.30)                    | 1.13 (0.90 to 1.27)         |
| P for trend                           |  | 0.008                                  | 0.18                        |

\*Leisure-time physical activity (LTPA) data analyzed separately due to the changes in self-reported LTPA measures from wave 2005 - 2006 to 2007-2008.

† Prevalence ratio and 95% confidence intervals were corrected using prevalence odds ratio and prevalence of high 25-OHD level



1  
2  
3 (>=50 ol/L) in reference groups.

4 ‡Adjusted for age, sex, race, body mass index, smoking status and dietary vitamin D supplement use.  
5  
6  
7  
8  
9

10  
11 Figure 1. Participants flow chart – cancer survivors aged 20 years or older from the National Health and Nutrition  
12 Examination Survey (2001 – 2006)  
13  
14  
15  
16  
17

18 Figure 2. Participants flow chart – cancer survivors aged 20 years or older from the National Health and Nutrition  
19 Examination Survey (2007 – 2010)  
20  
21  
22  
23  
24  
25  
26  
27  
28  
29  
30  
31  
32  
33  
34  
35  
36  
37  
38  
39  
40  
41  
42  
43  
44  
45  
46  
47  
48  
49

1  
2  
3  
4  
5  
6  
7  
8  
9  
10  
11  
12  
13  
14  
15  
16  
17  
18  
19  
20  
21  
22  
23  
24  
25  
26  
27  
28  
29  
30  
31  
32  
33  
34  
35  
36  
37  
38  
39  
40  
41  
42  
43  
44  
45  
46  
47  
48  
49  
50  
51  
52  
53  
54  
55  
56  
57  
58  
59  
60

For peer review only

1  
2  
3  
4  
5  
6  
7  
8  
9  
10  
11  
12  
13  
14  
15  
16  
17  
18  
19  
20  
21  
22  
23  
24  
25  
26  
27  
28  
29  
30  
31  
32  
33  
34  
35  
36  
37  
38  
39  
40  
41  
42  
43  
44  
45  
46  
47  
48  
49  
50  
51  
52  
53  
54  
55  
56  
57  
58  
59  
60

Figure 1. Participants flow chart - cancer survivors aged 20 years or older from the National Health and Nutrition Examination Survey (2001 - 2006)

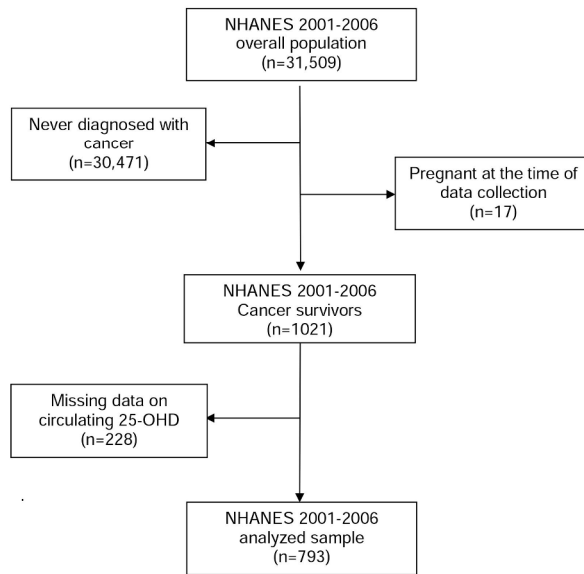

Figure 1. Participants flow chart - cancer survivors aged 20 years or older from the National Health and Nutrition Examination Survey (2001 - 2006)

215x279mm (300 x 300 DPI)

1  
2  
3  
4  
5  
6  
7  
8  
9  
10  
11  
12  
13  
14  
15  
16  
17  
18  
19  
20  
21  
22  
23  
24  
25  
26  
27  
28  
29  
30  
31  
32  
33  
34  
35  
36  
37  
38  
39  
40  
41  
42  
43  
44  
45  
46  
47  
48  
49  
50  
51  
52  
53  
54  
55  
56  
57  
58  
59  
60

Figure 2. Participants flow chart - cancer survivors aged 20 years or older from the National Health and Nutrition Examination Survey (2007-2010).

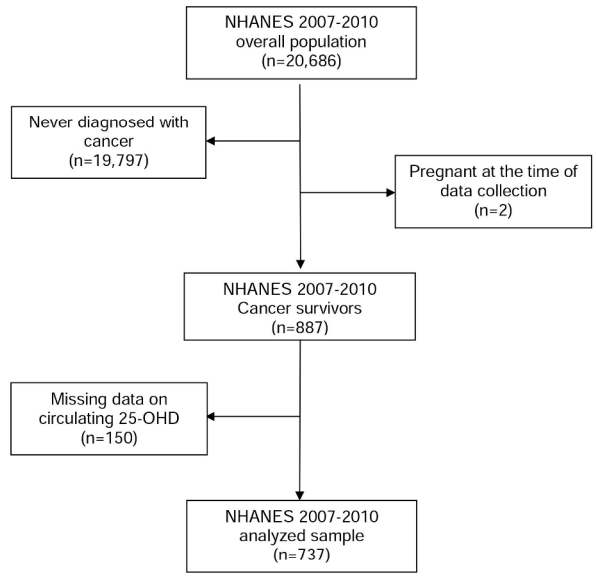

1

Figure 2. Participants flow chart - cancer survivors aged 20 years or older from the National Health and Nutrition Examination Survey (2007-2010)

215x279mm (300 x 300 DPI)

## STROBE Statement—checklist of items that should be included in reports of observational studies

|                              | Item No | Recommendation                                                                                                                                                                                                                                                                                                                                                                                                                                                                                                                                                                                                                                                                                            |
|------------------------------|---------|-----------------------------------------------------------------------------------------------------------------------------------------------------------------------------------------------------------------------------------------------------------------------------------------------------------------------------------------------------------------------------------------------------------------------------------------------------------------------------------------------------------------------------------------------------------------------------------------------------------------------------------------------------------------------------------------------------------|
| <b>Title and abstract</b>    | 1       | (a) Indicate the study's design with a commonly used term in the title or the abstract (Page 1)<br>(b) Provide in the abstract an informative and balanced summary of what was done and what was found (Page 2)                                                                                                                                                                                                                                                                                                                                                                                                                                                                                           |
| <b>Introduction</b>          |         |                                                                                                                                                                                                                                                                                                                                                                                                                                                                                                                                                                                                                                                                                                           |
| Background/rationale         | 2       | Explain the scientific background and rationale for the investigation being reported (page 4)                                                                                                                                                                                                                                                                                                                                                                                                                                                                                                                                                                                                             |
| Objectives                   | 3       | State specific objectives, including any prespecified hypotheses (Page 5)                                                                                                                                                                                                                                                                                                                                                                                                                                                                                                                                                                                                                                 |
| <b>Methods</b>               |         |                                                                                                                                                                                                                                                                                                                                                                                                                                                                                                                                                                                                                                                                                                           |
| Study design                 | 4       | Present key elements of study design early in the paper (Page 6)                                                                                                                                                                                                                                                                                                                                                                                                                                                                                                                                                                                                                                          |
| Setting                      | 5       | Describe the setting, locations, and relevant dates, including periods of recruitment, exposure, follow-up, and data collection (Page 6)                                                                                                                                                                                                                                                                                                                                                                                                                                                                                                                                                                  |
| Participants                 | 6       | (a) <i>Cohort study</i> —Give the eligibility criteria, and the sources and methods of selection of participants. Describe methods of follow-up<br><i>Case-control study</i> —Give the eligibility criteria, and the sources and methods of case ascertainment and control selection. Give the rationale for the choice of cases and controls<br><i>Cross-sectional study</i> —Give the eligibility criteria, and the sources and methods of selection of participants (Page 6)<br>(b) <i>Cohort study</i> —For matched studies, give matching criteria and number of exposed and unexposed<br><i>Case-control study</i> —For matched studies, give matching criteria and the number of controls per case |
| Variables                    | 7       | Clearly define all outcomes, exposures, predictors, potential confounders, and effect modifiers. Give diagnostic criteria, if applicable (Page 7-10)                                                                                                                                                                                                                                                                                                                                                                                                                                                                                                                                                      |
| Data sources/<br>measurement | 8*      | For each variable of interest, give sources of data and details of methods of assessment (measurement). Describe comparability of assessment methods if there is more than one group (Page 7-10)                                                                                                                                                                                                                                                                                                                                                                                                                                                                                                          |
| Bias                         | 9       | Describe any efforts to address potential sources of bias                                                                                                                                                                                                                                                                                                                                                                                                                                                                                                                                                                                                                                                 |
| Study size                   | 10      | Explain how the study size was arrived at (Page 6, Figures 1 and 2)                                                                                                                                                                                                                                                                                                                                                                                                                                                                                                                                                                                                                                       |
| Quantitative variables       | 11      | Explain how quantitative variables were handled in the analyses. If applicable, describe which groupings were chosen and why (Page 7-11)                                                                                                                                                                                                                                                                                                                                                                                                                                                                                                                                                                  |
| Statistical methods          | 12      | (a) Describe all statistical methods, including those used to control for confounding (Page 11-12)<br>(b) Describe any methods used to examine subgroups and interactions (Page 11-12)<br>(c) Explain how missing data were addressed<br>(d) <i>Cohort study</i> —If applicable, explain how loss to follow-up was addressed<br><i>Case-control study</i> —If applicable, explain how matching of cases and controls was addressed<br><i>Cross-sectional study</i> —If applicable, describe analytical methods taking account of sampling strategy (Page 11)<br>(e) Describe any sensitivity analyses (Page 12)                                                                                           |

Continued on next page

**Results**

|                  |     |                                                                                                                                                                                                                                                                                                                                                                                                                                        |
|------------------|-----|----------------------------------------------------------------------------------------------------------------------------------------------------------------------------------------------------------------------------------------------------------------------------------------------------------------------------------------------------------------------------------------------------------------------------------------|
| Participants     | 13* | (a) Report numbers of individuals at each stage of study—eg numbers potentially eligible, examined for eligibility, confirmed eligible, included in the study, completing follow-up, and analysed (Page 13)<br>(b) Give reasons for non-participation at each stage<br>(c) Consider use of a flow diagram (Figures 1 and 2)                                                                                                            |
| Descriptive data | 14* | (a) Give characteristics of study participants (eg demographic, clinical, social) and information on exposures and potential confounders (Page 13)<br>(b) Indicate number of participants with missing data for each variable of interest<br>(c) <i>Cohort study</i> —Summarise follow-up time (eg, average and total amount)                                                                                                          |
| Outcome data     | 15* | <i>Cohort study</i> —Report numbers of outcome events or summary measures over time<br><i>Case-control study</i> —Report numbers in each exposure category, or summary measures of exposure<br><i>Cross-sectional study</i> —Report numbers of outcome events or summary measures (Page 13)                                                                                                                                            |
| Main results     | 16  | (a) Give unadjusted estimates and, if applicable, confounder-adjusted estimates and their precision (eg, 95% confidence interval). Make clear which confounders were adjusted for and why they were included (Page 13-14)<br>(b) Report category boundaries when continuous variables were categorized (Page 7-10)<br>(c) If relevant, consider translating estimates of relative risk into absolute risk for a meaningful time period |
| Other analyses   | 17  | Report other analyses done—eg analyses of subgroups and interactions, and sensitivity analyses (Page 14)                                                                                                                                                                                                                                                                                                                               |

**Discussion**

|                  |    |                                                                                                                                                                                         |
|------------------|----|-----------------------------------------------------------------------------------------------------------------------------------------------------------------------------------------|
| Key results      | 18 | Summarise key results with reference to study objectives (Page 16)                                                                                                                      |
| Limitations      | 19 | Discuss limitations of the study, taking into account sources of potential bias or imprecision. Discuss both direction and magnitude of any potential bias (Page 19)                    |
| Interpretation   | 20 | Give a cautious overall interpretation of results considering objectives, limitations, multiplicity of analyses, results from similar studies, and other relevant evidence (Page 16-18) |
| Generalisability | 21 | Discuss the generalisability (external validity) of the study results (Page 19-20)                                                                                                      |

**Other information**

|         |    |                                                                                                                                                                         |
|---------|----|-------------------------------------------------------------------------------------------------------------------------------------------------------------------------|
| Funding | 22 | Give the source of funding and the role of the funders for the present study and, if applicable, for the original study on which the present article is based (Page 22) |
|---------|----|-------------------------------------------------------------------------------------------------------------------------------------------------------------------------|

\*Give information separately for cases and controls in case-control studies and, if applicable, for exposed and unexposed groups in cohort and cross-sectional studies.

**Note:** An Explanation and Elaboration article discusses each checklist item and gives methodological background and published examples of transparent reporting. The STROBE checklist is best used in conjunction with this article (freely available on the Web sites of PLoS Medicine at <http://www.plosmedicine.org/>, Annals of Internal Medicine at <http://www.annals.org/>, and Epidemiology at <http://www.epidem.com/>). Information on the STROBE Initiative is available at [www.strobe-statement.org](http://www.strobe-statement.org).
